# Supplementary material for: Cellular Functions and Gene and Protein Expression Profiles in Endothelial Cells Derived from Moyamoya Disease-Specific iPS Cells
Source: PLoS One. 2016 Sep 23;11(9):e0163561. doi: 10.1371/journal.pone.0163561 (PMC5035048; doi:10.1371/journal.pone.0163561)
Supplement: S1 Dataset — (XLSX) [file pone.0163561.s001.xlsx]

## Sheet: Sheet1
Probe Set ID	[Control1](raw)	[Control2](raw)	[Control3](raw)	[MMD1](raw)	[MMD2](raw)	[MMD3](raw)	[Control1](normalized)	[Control2](normalized)	[Control3](normalized)	[MMD1](normalized)	[MMD2](normalized)	[MMD3](normalized)	[Control1](flag)	[Control2](flag)	[Control3](flag)	[MMD1](flag)	[MMD2](flag)	[MMD3](flag)	Gene Symbol	Entrez Gene	Gene Ontology Biological Process	Gene Ontology Cellular Component	Gene Ontology Molecular Function	Alignments	Annotation Date	Annotation Description	Annotation Notes	Annotation Transcript Cluster	Archival UniGene Cluster	Chromosomal Location	Chromosome End Index(Avadis)	Chromosome Number(Avadis)	Chromosome Percentage Identity(Avadis)	Chromosome Start Index(Avadis)	Chromosome Strand(Avadis)	EC	Ensembl	Gene Title	GeneChip Array	Genome Version	GO(Avadis)	InterPro	MGI Name	OMIM	Pathway	RefSeq Protein ID	RefSeq Transcript ID	Representative Public ID	Sequence Source
AFFX-BioB-5_at	288.988	220.15	268.91	193.777	198.786	234.634	0.0145793	-0.134852	0	-0.274517	-0.164214	-0.152452	P	P	P	P	P	P							2013-10-23	This probe set was annotated using the Design Representative Id based pipeline to a GenBank identifier using 5 transcripts. // false // Design Representative Id // R		J04423											Human Genome U133 Plus 2.0 Array	February 2009 (Genome Reference Consortium GRCh37)								AFFX-BioB-5	Affymetrix Proprietary Database
AFFX-BioB-M_at	341.38	285.087	299.067	249.603	222.848	289.729	0.016881	0	-0.0847211	-0.147345	-0.237435	-0.0862279	P	P	P	P	P	P							2013-10-23	This probe set was annotated using the Design Representative Id based pipeline to a GenBank identifier using 5 transcripts. // false // Design Representative Id // R		J04423											Human Genome U133 Plus 2.0 Array	February 2009 (Genome Reference Consortium GRCh37)								AFFX-BioB-M	Affymetrix Proprietary Database
AFFX-BioB-3_at	244.212	193.056	234.431	168.373	177.249	182.709	0	-0.0960202	0.030333	-0.248955	-0.101359	-0.285026	P	P	P	P	P	P							2013-10-23	This probe set was annotated using the Design Representative Id based pipeline to a GenBank identifier using 5 transcripts. // false // Design Representative Id // R		J04423											Human Genome U133 Plus 2.0 Array	February 2009 (Genome Reference Consortium GRCh37)								AFFX-BioB-3	Affymetrix Proprietary Database
AFFX-BioC-5_at	719.866	566.367	684.136	498.556	512.683	560.643	0	-0.102898	0.0158629	-0.242453	-0.128659	-0.22708	P	P	P	P	P	P							2013-10-23	This probe set was annotated using the Design Representative Id based pipeline to a GenBank identifier using 5 transcripts. // false // Design Representative Id // R		J04423											Human Genome U133 Plus 2.0 Array	February 2009 (Genome Reference Consortium GRCh37)								AFFX-BioC-5	Affymetrix Proprietary Database
AFFX-BioC-3_at	1027.35	849.765	996.092	757.888	796.215	855.703	0	-0.030694	0.0447354	-0.151349	-0.00669098	-0.130176	P	P	P	P	P	P							2013-10-23	This probe set was annotated using the Design Representative Id based pipeline to a GenBank identifier using 5 transcripts. // false // Design Representative Id // R		J04423											Human Genome U133 Plus 2.0 Array	February 2009 (Genome Reference Consortium GRCh37)								AFFX-BioC-3	Affymetrix Proprietary Database
AFFX-BioDn-5_at	1674.09	1250.46	1641.77	1276.08	1209.74	1359.67	0	-0.177829	0.0611825	-0.104144	-0.107675	-0.166549	P	P	P	P	P	P							2013-10-23	This probe set was annotated using the Design Representative Id based pipeline to a GenBank identifier using 5 transcripts. // false // Design Representative Id // R		J04423											Human Genome U133 Plus 2.0 Array	February 2009 (Genome Reference Consortium GRCh37)								AFFX-BioDn-5	Affymetrix Proprietary Database
AFFX-BioDn-3_at	2896.59	2260.12	2749.53	2296.42	2366.15	2698.37	0	-0.11486	0.0141358	-0.0474467	0.0691891	0.0312991	P	P	P	P	P	P							2013-10-23	This probe set was annotated using the Design Representative Id based pipeline to a GenBank identifier using 5 transcripts. // false // Design Representative Id // R		J04423											Human Genome U133 Plus 2.0 Array	February 2009 (Genome Reference Consortium GRCh37)								AFFX-BioDn-3	Affymetrix Proprietary Database
AFFX-CreX-5_at	8198.87	7124.64	8399.76	7298.62	7108.44	7397.75	-0.0404882	0	0.0837436	0.0792308	0.114624	-0.0552611	P	P	P	P	P	P							2013-10-23	This probe set was annotated using the Design Representative Id based pipeline to a GenBank identifier using 5 transcripts. // false // Design Representative Id // R		X03453											Human Genome U133 Plus 2.0 Array	February 2009 (Genome Reference Consortium GRCh37)								AFFX-CreX-5	Affymetrix Proprietary Database
AFFX-CreX-3_at	8293.41	6845.59	8469.2	7252.63	7028.31	7802.44	0	-0.0336952	0.119571	0.0940585	0.122216	0.045526	P	P	P	P	P	P							2013-10-23	This probe set was annotated using the Design Representative Id based pipeline to a GenBank identifier using 5 transcripts. // false // Design Representative Id // R		X03453											Human Genome U133 Plus 2.0 Array	February 2009 (Genome Reference Consortium GRCh37)								AFFX-CreX-3	Affymetrix Proprietary Database
AFFX-DapX-5_at	434.452	270.677	350.841	268.082	202.311	241.047	0.219069	-0.22046	0	-0.189936	-0.52255	-0.497248	P	P	P	P	P	P							2013-10-23	This probe set was annotated using the Design Representative Id based pipeline to a GenBank identifier using 5 transcripts. // false // Design Representative Id // R		L38424											Human Genome U133 Plus 2.0 Array	February 2009 (Genome Reference Consortium GRCh37)								AFFX-DapX-5	Affymetrix Proprietary Database
AFFX-DapX-M_at	790.747	583.39	680.56	549.07	424.943	500.395	0.127187	-0.0684753	0	-0.111521	-0.407758	-0.399398	P	P	P	P	P	P							2013-10-23	This probe set was annotated using the Design Representative Id based pipeline to a GenBank identifier using 5 transcripts. // false // Design Representative Id // R		L38424											Human Genome U133 Plus 2.0 Array	February 2009 (Genome Reference Consortium GRCh37)								AFFX-DapX-M	Affymetrix Proprietary Database
AFFX-DapX-3_at	755.883	527.641	654.324	491.962	395.128	521.202	0.118848	-0.156662	0	-0.213247	-0.455989	-0.283906	P	P	P	P	P	P							2013-10-23	This probe set was annotated using the Design Representative Id based pipeline to a GenBank identifier using 5 transcripts. // false // Design Representative Id // R		L38424											Human Genome U133 Plus 2.0 Array	February 2009 (Genome Reference Consortium GRCh37)								AFFX-DapX-3	Affymetrix Proprietary Database
AFFX-LysX-5_at	48.0569	27.6587	43.0934	27.5819	23.2855	30.5437	0.0679698	-0.485943	0	-0.445532	-0.616341	-0.452332	P	P	P	P	P	P							2013-10-23	This probe set was annotated using the Design Representative Id based pipeline to a GenBank identifier using 5 transcripts. // false // Design Representative Id // R		X17013											Human Genome U133 Plus 2.0 Array	February 2009 (Genome Reference Consortium GRCh37)								AFFX-LysX-5	Affymetrix Proprietary Database
AFFX-LysX-M_at	62.9523	51.6381	56.6256	45.6099	41.5318	52.0885	0.0427299	0	-0.0207682	-0.134664	-0.196312	-0.0970001	P	P	P	P	P	P							2013-10-23	This probe set was annotated using the Design Representative Id based pipeline to a GenBank identifier using 5 transcripts. // false // Design Representative Id // R		X17013											Human Genome U133 Plus 2.0 Array	February 2009 (Genome Reference Consortium GRCh37)								AFFX-LysX-M	Affymetrix Proprietary Database
AFFX-LysX-3_at	121.639	87.1889	109.647	87.9097	70.5122	78.6862	0.0604291	-0.176865	0	-0.120562	-0.365228	-0.434427	P	P	P	P	P	P							2013-10-23	This probe set was annotated using the Design Representative Id based pipeline to a GenBank identifier using 5 transcripts. // false // Design Representative Id // R		X17013											Human Genome U133 Plus 2.0 Array	February 2009 (Genome Reference Consortium GRCh37)								AFFX-LysX-3	Affymetrix Proprietary Database
AFFX-PheX-5_at	80.8222	64.7222	55.7711	49.0414	39.8181	51.0619	0.0773983	0	-0.36853	-0.355835	-0.582929	-0.451541	P	P	P	P	P	P							2013-10-23	This probe set was annotated using the Design Representative Id based pipeline to a GenBank identifier using 5 transcripts. // false // Design Representative Id // R		M24537											Human Genome U133 Plus 2.0 Array	February 2009 (Genome Reference Consortium GRCh37)								AFFX-PheX-5	Affymetrix Proprietary Database
AFFX-PheX-M_at	103.263	69.4401	80.2373	68.9173	70.1692	62.4057	0.274664	-0.0547185	0	-0.0211959	0.078259	-0.318337	P	P	P	P	P	P							2013-10-23	This probe set was annotated using the Design Representative Id based pipeline to a GenBank identifier using 5 transcripts. // false // Design Representative Id // R		M24537											Human Genome U133 Plus 2.0 Array	February 2009 (Genome Reference Consortium GRCh37)								AFFX-PheX-M	Affymetrix Proprietary Database
AFFX-PheX-3_at	75.5613	58.011	75.4776	71.8118	53.5087	70.1769	0	-0.138224	0.0877094	0.214094	-0.13687	0.0269141	P	P	P	P	P	P							2013-10-23	This probe set was annotated using the Design Representative Id based pipeline to a GenBank identifier using 5 transcripts. // false // Design Representative Id // R		M24537											Human Genome U133 Plus 2.0 Array	February 2009 (Genome Reference Consortium GRCh37)								AFFX-PheX-3	Affymetrix Proprietary Database
AFFX-ThrX-5_at	55.7484	44.1775	43.3865	38.9225	33.3904	34.3514	0.0925245	0	-0.179851	-0.138281	-0.28597	-0.472471	P	P	P	P	P	P							2013-10-23	This probe set was annotated using the Design Representative Id based pipeline to a GenBank identifier using 5 transcripts. // false // Design Representative Id // R		X04603											Human Genome U133 Plus 2.0 Array	February 2009 (Genome Reference Consortium GRCh37)								AFFX-ThrX-5	Affymetrix Proprietary Database
AFFX-ThrX-M_at	88.2961	84.726	76.4815	71.5252	60.9697	65.8312	0	0.183551	-0.11793	-0.0163789	-0.173254	-0.290011	P	P	P	P	P	P							2013-10-23	This probe set was annotated using the Design Representative Id based pipeline to a GenBank identifier using 5 transcripts. // false // Design Representative Id // R		X04603											Human Genome U133 Plus 2.0 Array	February 2009 (Genome Reference Consortium GRCh37)								AFFX-ThrX-M	Affymetrix Proprietary Database
AFFX-ThrX-3_at	185.593	138.177	141.181	116.303	106.752	128.24	0.182528	0	-0.122756	-0.204204	-0.254347	-0.217205	P	P	P	P	P	P							2013-10-23	This probe set was annotated using the Design Representative Id based pipeline to a GenBank identifier using 5 transcripts. // false // Design Representative Id // R		X04603											Human Genome U133 Plus 2.0 Array	February 2009 (Genome Reference Consortium GRCh37)								AFFX-ThrX-3	Affymetrix Proprietary Database
AFFX-TrpnX-5_at	8.68977	1.32116	6.43957	1.33867	4.52163	7.93852	0.343046	-2.13137	0	-2.06795	-0.238429	0.346163	P	A	A	A	A	A							2013-10-23	This probe set was annotated using the Design Representative Id based pipeline to a GenBank identifier using 5 transcripts. // false // Design Representative Id // R		K01391											Human Genome U133 Plus 2.0 Array	February 2009 (Genome Reference Consortium GRCh37)								AFFX-TrpnX-5	Affymetrix Proprietary Database
AFFX-TrpnX-M_at	1	1	1	1	1.65397	3.56502	-0.0893083	0.153786	0	0.198211	0.997632	1.87817	A	A	A	A	A	A							2013-10-23	This probe set was annotated using the Design Representative Id based pipeline to a GenBank identifier using 5 transcripts. // false // Design Representative Id // R		K01391											Human Genome U133 Plus 2.0 Array	February 2009 (Genome Reference Consortium GRCh37)								AFFX-TrpnX-M	Affymetrix Proprietary Database
AFFX-TrpnX-3_at	3.45413	3.13711	2.85655	1	6.14193	1	0	0.104208	-0.184739	-1.5008	1.19137	-1.65476	A	A	A	A	M	A							2013-10-23	This probe set was annotated using the Design Representative Id based pipeline to a GenBank identifier using 5 transcripts. // false // Design Representative Id // R		K01391											Human Genome U133 Plus 2.0 Array	February 2009 (Genome Reference Consortium GRCh37)								AFFX-TrpnX-3	Affymetrix Proprietary Database
AFFX-r2-Ec-bioB-5_at	355.021	280.981	344.264	284.545	257.083	238.736	0	-0.0943384	0.0449176	-0.0317302	-0.104671	-0.438922	P	P	P	P	P	P							2013-10-23	This probe set was annotated using the Design Representative Id based pipeline to a GenBank identifier using 5 transcripts. // false // Design Representative Id // R		J04423											Human Genome U133 Plus 2.0 Array	February 2009 (Genome Reference Consortium GRCh37)								AFFX-r2-Ec-bioB-5	Affymetrix Proprietary Database
AFFX-r2-Ec-bioB-M_at	396.851	333.305	386.547	277.9	283.091	345.619	0	-0.00865936	0.0513539	-0.226513	-0.12633	-0.0658488	P	P	P	P	P	P							2013-10-23	This probe set was annotated using the Design Representative Id based pipeline to a GenBank identifier using 5 transcripts. // false // Design Representative Id // R		J04423											Human Genome U133 Plus 2.0 Array	February 2009 (Genome Reference Consortium GRCh37)								AFFX-r2-Ec-bioB-M	Affymetrix Proprietary Database
AFFX-r2-Ec-bioB-3_at	339.538	251.488	334.825	245.026	239.026	282.124	0	-0.189991	0.0691438	-0.183118	-0.145404	-0.133678	P	P	P	P	P	P							2013-10-23	This probe set was annotated using the Design Representative Id based pipeline to a GenBank identifier using 5 transcripts. // false // Design Representative Id // R		J04423											Human Genome U133 Plus 2.0 Array	February 2009 (Genome Reference Consortium GRCh37)								AFFX-r2-Ec-bioB-3	Affymetrix Proprietary Database
AFFX-r2-Ec-bioC-5_at	924.22	732.841	888.776	597.696	682.056	720.311	0	-0.0916424	0.0328917	-0.341305	-0.0773439	-0.226052	P	P	P	P	P	P							2013-10-23	This probe set was annotated using the Design Representative Id based pipeline to a GenBank identifier using 5 transcripts. // false // Design Representative Id // R		J04423											Human Genome U133 Plus 2.0 Array	February 2009 (Genome Reference Consortium GRCh37)								AFFX-r2-Ec-bioC-5	Affymetrix Proprietary Database
AFFX-r2-Ec-bioC-3_at	1178.85	966.882	1140.65	974.016	922.847	955.937	0	-0.0428791	0.0417762	0.0121503	0.00778103	-0.168833	P	P	P	P	P	P							2013-10-23	This probe set was annotated using the Design Representative Id based pipeline to a GenBank identifier using 5 transcripts. // false // Design Representative Id // R		J04423											Human Genome U133 Plus 2.0 Array	February 2009 (Genome Reference Consortium GRCh37)								AFFX-r2-Ec-bioC-3	Affymetrix Proprietary Database
AFFX-r2-Ec-bioD-5_at	3560.34	2884.28	3292.29	2847.43	2697.32	3307.79	0.0236135	-0.0370936	0	-0.0112209	-0.0158725	0.051034	P	P	P	P	P	P							2013-10-23	This probe set was annotated using the Design Representative Id based pipeline to a GenBank identifier using 5 transcripts. // false // Design Representative Id // R		J04423											Human Genome U133 Plus 2.0 Array	February 2009 (Genome Reference Consortium GRCh37)								AFFX-r2-Ec-bioD-5	Affymetrix Proprietary Database
AFFX-r2-Ec-bioD-3_at	4356.66	3406.41	4013.47	3480.89	3462.43	3773.94	0.0290647	-0.0828118	0	-0.00718498	0.0586295	-0.0445204	P	P	P	P	P	P							2013-10-23	This probe set was annotated using the Design Representative Id based pipeline to a GenBank identifier using 5 transcripts. // false // Design Representative Id // R		J04423											Human Genome U133 Plus 2.0 Array	February 2009 (Genome Reference Consortium GRCh37)								AFFX-r2-Ec-bioD-3	Affymetrix Proprietary Database
AFFX-r2-P1-cre-5_at	9029.49	8017.63	8959.49	8101.99	8305.15	8426.96	-0.0716248	0	0.00645494	0.059526	0.168739	-0.0376906	P	P	P	P	P	P							2013-10-23	This probe set was annotated using the Design Representative Id based pipeline to a GenBank identifier using 5 transcripts. // false // Design Representative Id // R		X03453											Human Genome U133 Plus 2.0 Array	February 2009 (Genome Reference Consortium GRCh37)								AFFX-r2-P1-cre-5	Affymetrix Proprietary Database
AFFX-r2-P1-cre-3_at	12444.4	11634.5	12405	11260.6	11492.4	10965.7	-0.0847364	0.061274	0	0.0585728	0.16146	-0.133667	P	P	P	P	P	P							2013-10-23	This probe set was annotated using the Design Representative Id based pipeline to a GenBank identifier using 5 transcripts. // false // Design Representative Id // R		X03453											Human Genome U133 Plus 2.0 Array	February 2009 (Genome Reference Consortium GRCh37)								AFFX-r2-P1-cre-3	Affymetrix Proprietary Database
AFFX-r2-Bs-dap-5_at	502.431	339.318	389.982	288.2	207.837	272.281	0.276208	-0.0469842	0	-0.238128	-0.636265	-0.474056	P	P	P	P	P	P							2013-10-23	This probe set was annotated using the Design Representative Id based pipeline to a GenBank identifier using 5 transcripts. // false // Design Representative Id // R		L38424											Human Genome U133 Plus 2.0 Array	February 2009 (Genome Reference Consortium GRCh37)								AFFX-r2-Bs-dap-5	Affymetrix Proprietary Database
AFFX-r2-Bs-dap-M_at	953.281	701.402	845.28	633.753	471.382	596.342	0.0841641	-0.115402	0	-0.217298	-0.570837	-0.459031	P	P	P	P	P	P							2013-10-23	This probe set was annotated using the Design Representative Id based pipeline to a GenBank identifier using 5 transcripts. // false // Design Representative Id // R		L38424											Human Genome U133 Plus 2.0 Array	February 2009 (Genome Reference Consortium GRCh37)								AFFX-r2-Bs-dap-M	Affymetrix Proprietary Database
AFFX-r2-Bs-dap-3_at	929.863	680.639	773.359	668.729	546.628	679.128	0.176572	-0.0304608	0	-0.0115061	-0.228883	-0.143197	P	P	P	P	P	P							2013-10-23	This probe set was annotated using the Design Representative Id based pipeline to a GenBank identifier using 5 transcripts. // false // Design Representative Id // R		L38424											Human Genome U133 Plus 2.0 Array	February 2009 (Genome Reference Consortium GRCh37)								AFFX-r2-Bs-dap-3	Affymetrix Proprietary Database
AFFX-r2-Bs-lys-5_at	65.4152	57.4756	52.3817	47.7506	38.1919	42.4401	0	0.0564199	-0.231253	-0.166586	-0.415357	-0.490633	P	P	P	P	P	P							2013-10-23	This probe set was annotated using the Design Representative Id based pipeline to a GenBank identifier using 5 transcripts. // false // Design Representative Id // R		X17013											Human Genome U133 Plus 2.0 Array	February 2009 (Genome Reference Consortium GRCh37)								AFFX-r2-Bs-lys-5	Affymetrix Proprietary Database
AFFX-r2-Bs-lys-M_at	65.4927	58.0658	63.0318	40.0217	35.3938	50.6097	-0.0340543	0.0353951	0	-0.457087	-0.560888	-0.272408	P	P	P	P	P	P							2013-10-23	This probe set was annotated using the Design Representative Id based pipeline to a GenBank identifier using 5 transcripts. // false // Design Representative Id // R		X17013											Human Genome U133 Plus 2.0 Array	February 2009 (Genome Reference Consortium GRCh37)								AFFX-r2-Bs-lys-M	Affymetrix Proprietary Database
AFFX-r2-Bs-lys-3_at	71.1577	62.888	68.5819	55.8972	40.7964	53.7263	-0.0361161	0.0287428	0	-0.0968399	-0.477691	-0.307944	P	P	P	P	P	P							2013-10-23	This probe set was annotated using the Design Representative Id based pipeline to a GenBank identifier using 5 transcripts. // false // Design Representative Id // R		X17013											Human Genome U133 Plus 2.0 Array	February 2009 (Genome Reference Consortium GRCh37)								AFFX-r2-Bs-lys-3	Affymetrix Proprietary Database
AFFX-r2-Bs-phe-5_at	88.5558	66.3707	84.4389	54.9139	59.5163	55.8529	0	-0.172946	0.0206294	-0.401896	-0.2123	-0.53139	P	P	P	P	P	P							2013-10-23	This probe set was annotated using the Design Representative Id based pipeline to a GenBank identifier using 5 transcripts. // false // Design Representative Id // R		M24537											Human Genome U133 Plus 2.0 Array	February 2009 (Genome Reference Consortium GRCh37)								AFFX-r2-Bs-phe-5	Affymetrix Proprietary Database
AFFX-r2-Bs-phe-M_at	101.31	79.7391	93.5273	66.2603	59.5052	67.4445	0.0260077	-0.0763135	0	-0.299032	-0.380677	-0.427431	P	P	P	P	P	P							2013-10-23	This probe set was annotated using the Design Representative Id based pipeline to a GenBank identifier using 5 transcripts. // false // Design Representative Id // R		M24537											Human Genome U133 Plus 2.0 Array	February 2009 (Genome Reference Consortium GRCh37)								AFFX-r2-Bs-phe-M	Affymetrix Proprietary Database
AFFX-r2-Bs-phe-3_at	206.744	128.843	162.349	138.43	139.356	131.707	0.259438	-0.179701	0	-0.031734	0.0513673	-0.257508	P	P	P	P	P	P							2013-10-23	This probe set was annotated using the Design Representative Id based pipeline to a GenBank identifier using 5 transcripts. // false // Design Representative Id // R		M24537											Human Genome U133 Plus 2.0 Array	February 2009 (Genome Reference Consortium GRCh37)								AFFX-r2-Bs-phe-3	Affymetrix Proprietary Database
AFFX-r2-Bs-thr-3_s_at	219.402	238.083	198.347	186.191	172.982	206.246	0	0.360987	-0.0562429	0.050724	0.0180492	0.0443559	P	P	P	P	P	P							2013-10-23	This probe set was annotated using the Design Representative Id based pipeline to a GenBank identifier using 5 transcripts. // false // Design Representative Id // R		X04603											Human Genome U133 Plus 2.0 Array	February 2009 (Genome Reference Consortium GRCh37)								AFFX-r2-Bs-thr-3	Affymetrix Proprietary Database
AFFX-r2-Bs-thr-M_s_at	140.2	146.299	116.435	121.406	96.2331	126.999	0	0.304533	-0.178649	0.0798802	-0.181876	-0.00910044	P	P	P	P	P	P							2013-10-23	This probe set was annotated using the Design Representative Id based pipeline to a GenBank identifier using 5 transcripts. // false // Design Representative Id // R		X04603											Human Genome U133 Plus 2.0 Array	February 2009 (Genome Reference Consortium GRCh37)								AFFX-r2-Bs-thr-M	Affymetrix Proprietary Database
AFFX-r2-Bs-thr-5_s_at	51.1352	61.6977	40.8666	40.1473	35.7555	44.5723	0	0.513996	-0.234085	-0.0614939	-0.155148	-0.0646038	P	P	P	P	P	P							2013-10-23	This probe set was annotated using the Design Representative Id based pipeline to a GenBank identifier using 5 transcripts. // false // Design Representative Id // R		X04603											Human Genome U133 Plus 2.0 Array	February 2009 (Genome Reference Consortium GRCh37)								AFFX-r2-Bs-thr-5	Affymetrix Proprietary Database
AFFX-HUMISGF3A/M97935_5_at	55.177	64.2233	56.386	40.8427	46.6218	46.5011	-0.120578	0.341546	0	-0.267048	-0.00263834	-0.233816	P	P	P	P	P	P	STAT1	6772	0000122 // negative regulation of transcription from RNA polymerase II promoter // inferred from sequence or structural similarity///0001937 // negative regulation of endothelial cell proliferation // inferred from mutant phenotype///0002053 // positive regulation of mesenchymal cell proliferation // inferred from sequence or structural similarity///0003340 // negative regulation of mesenchymal t…	0000790 // nuclear chromatin // inferred from direct assay///0005634 // nucleus // inferred from direct assay///0005654 // nucleoplasm // traceable author statement///0005730 // nucleolus // inferred from direct assay///0005737 // cytoplasm // inferred from direct assay///0005829 // cytosol // traceable author statement///0030424 // axon // inferred from sequence or structural similarity///003042…	0000978 // RNA polymerase II core promoter proximal region sequence-specific DNA binding // inferred from direct assay///0000979 // RNA polymerase II core promoter sequence-specific DNA binding // inferred from direct assay///0000983 // RNA polymerase II core promoter sequence-specific DNA binding transcription factor activity // inferred from direct assay///0003677 // DNA binding // inferred fro…		2013-10-23	This probe set was annotated using the Design Representative Id based pipeline to a Entrez Gene identifier using 1 transcripts. // false // Design Representative Id // R		M97935		chr2q32.2								signal transducer and activator of transcription 1, 91kDa	Human Genome U133 Plus 2.0 Array	February 2009 (Genome Reference Consortium GRCh37)	GO:0000122|GO:0001937|GO:0002053|GO:0003340|GO:0006351|GO:0006355|GO:0006357|GO:0006915|GO:0006917|GO:0007165|GO:0007259|GO:0008015|GO:0009617|GO:0016525|GO:0019048|GO:0019221|GO:0031663|GO:0032496|GO:0033209|GO:0034097|GO:0035458|GO:0042981|GO:0043124|GO:0043330|GO:0043434|GO:0043542|GO:0045893|GO:0045944|GO:0045944|GO:0048661|GO:0051591|GO:0051607|GO:0060333|GO:0060333|GO:0060334|GO:0060337|GO:…			209950///600555///613796///614162		NP_009330///NP_644671	NM_007315///NM_139266	AFFX-HUMISGF3A/M97935_5	Affymetrix Proprietary Database
AFFX-HUMISGF3A/M97935_MA_at	76.2845	101.96	115.795	99.5258	133.202	88.751	-0.66163	0	0.0297956	0.00956964	0.50353	-0.30969	P	P	P	P	P	P	STAT1	6772	0000122 // negative regulation of transcription from RNA polymerase II promoter // inferred from sequence or structural similarity///0001937 // negative regulation of endothelial cell proliferation // inferred from mutant phenotype///0002053 // positive regulation of mesenchymal cell proliferation // inferred from sequence or structural similarity///0003340 // negative regulation of mesenchymal t…	0000790 // nuclear chromatin // inferred from direct assay///0005634 // nucleus // inferred from direct assay///0005654 // nucleoplasm // traceable author statement///0005730 // nucleolus // inferred from direct assay///0005737 // cytoplasm // inferred from direct assay///0005829 // cytosol // traceable author statement///0030424 // axon // inferred from sequence or structural similarity///003042…	0000978 // RNA polymerase II core promoter proximal region sequence-specific DNA binding // inferred from direct assay///0000979 // RNA polymerase II core promoter sequence-specific DNA binding // inferred from direct assay///0000983 // RNA polymerase II core promoter sequence-specific DNA binding transcription factor activity // inferred from direct assay///0003677 // DNA binding // inferred fro…		2013-10-23	This probe set was annotated using the Design Representative Id based pipeline to a Entrez Gene identifier using 1 transcripts. // false // Design Representative Id // R		M97935		chr2q32.2								signal transducer and activator of transcription 1, 91kDa	Human Genome U133 Plus 2.0 Array	February 2009 (Genome Reference Consortium GRCh37)	GO:0000122|GO:0001937|GO:0002053|GO:0003340|GO:0006351|GO:0006355|GO:0006357|GO:0006915|GO:0006917|GO:0007165|GO:0007259|GO:0008015|GO:0009617|GO:0016525|GO:0019048|GO:0019221|GO:0031663|GO:0032496|GO:0033209|GO:0034097|GO:0035458|GO:0042981|GO:0043124|GO:0043330|GO:0043434|GO:0043542|GO:0045893|GO:0045944|GO:0045944|GO:0048661|GO:0051591|GO:0051607|GO:0060333|GO:0060333|GO:0060334|GO:0060337|GO:…			209950///600555///613796///614162		NP_009330///NP_644671	NM_007315///NM_139266	AFFX-HUMISGF3A/M97935_MA	Affymetrix Proprietary Database
AFFX-HUMISGF3A/M97935_MB_at	94.6622	88.8814	85.9636	80.1304	92.916	105.656	0	0.152188	-0.0497532	0.047081	0.334142	0.292087	P	P	P	P	P	P	STAT1	6772	0000122 // negative regulation of transcription from RNA polymerase II promoter // inferred from sequence or structural similarity///0001937 // negative regulation of endothelial cell proliferation // inferred from mutant phenotype///0002053 // positive regulation of mesenchymal cell proliferation // inferred from sequence or structural similarity///0003340 // negative regulation of mesenchymal t…	0000790 // nuclear chromatin // inferred from direct assay///0005634 // nucleus // inferred from direct assay///0005654 // nucleoplasm // traceable author statement///0005730 // nucleolus // inferred from direct assay///0005737 // cytoplasm // inferred from direct assay///0005829 // cytosol // traceable author statement///0030424 // axon // inferred from sequence or structural similarity///003042…	0000978 // RNA polymerase II core promoter proximal region sequence-specific DNA binding // inferred from direct assay///0000979 // RNA polymerase II core promoter sequence-specific DNA binding // inferred from direct assay///0000983 // RNA polymerase II core promoter sequence-specific DNA binding transcription factor activity // inferred from direct assay///0003677 // DNA binding // inferred fro…		2013-10-23	This probe set was annotated using the Design Representative Id based pipeline to a Entrez Gene identifier using 1 transcripts. // false // Design Representative Id // R		M97935		chr2q32.2								signal transducer and activator of transcription 1, 91kDa	Human Genome U133 Plus 2.0 Array	February 2009 (Genome Reference Consortium GRCh37)	GO:0000122|GO:0001937|GO:0002053|GO:0003340|GO:0006351|GO:0006355|GO:0006357|GO:0006915|GO:0006917|GO:0007165|GO:0007259|GO:0008015|GO:0009617|GO:0016525|GO:0019048|GO:0019221|GO:0031663|GO:0032496|GO:0033209|GO:0034097|GO:0035458|GO:0042981|GO:0043124|GO:0043330|GO:0043434|GO:0043542|GO:0045893|GO:0045944|GO:0045944|GO:0048661|GO:0051591|GO:0051607|GO:0060333|GO:0060333|GO:0060334|GO:0060337|GO:…			209950///600555///613796///614162		NP_009330///NP_644671	NM_007315///NM_139266	AFFX-HUMISGF3A/M97935_MB	Affymetrix Proprietary Database
AFFX-HUMISGF3A/M97935_3_at	274.525	251.292	288.383	232.768	221.784	269.01	-0.115521	0	0.0448327	-0.0660458	-0.0623026	-0.0112357	P	P	P	P	P	P	STAT1	6772	0000122 // negative regulation of transcription from RNA polymerase II promoter // inferred from sequence or structural similarity///0001937 // negative regulation of endothelial cell proliferation // inferred from mutant phenotype///0002053 // positive regulation of mesenchymal cell proliferation // inferred from sequence or structural similarity///0003340 // negative regulation of mesenchymal t…	0000790 // nuclear chromatin // inferred from direct assay///0005634 // nucleus // inferred from direct assay///0005654 // nucleoplasm // traceable author statement///0005730 // nucleolus // inferred from direct assay///0005737 // cytoplasm // inferred from direct assay///0005829 // cytosol // traceable author statement///0030424 // axon // inferred from sequence or structural similarity///003042…	0000978 // RNA polymerase II core promoter proximal region sequence-specific DNA binding // inferred from direct assay///0000979 // RNA polymerase II core promoter sequence-specific DNA binding // inferred from direct assay///0000983 // RNA polymerase II core promoter sequence-specific DNA binding transcription factor activity // inferred from direct assay///0003677 // DNA binding // inferred fro…		2013-10-23	This probe set was annotated using the Design Representative Id based pipeline to a Entrez Gene identifier using 2 transcripts. // false // Design Representative Id // R		M97935		chr2q32.2							ENSG00000115415	signal transducer and activator of transcription 1, 91kDa	Human Genome U133 Plus 2.0 Array	February 2009 (Genome Reference Consortium GRCh37)	GO:0000122|GO:0001937|GO:0002053|GO:0003340|GO:0006351|GO:0006355|GO:0006357|GO:0006915|GO:0006917|GO:0007165|GO:0007259|GO:0008015|GO:0009617|GO:0016525|GO:0019048|GO:0019221|GO:0031663|GO:0032496|GO:0033209|GO:0034097|GO:0035458|GO:0042981|GO:0043124|GO:0043330|GO:0043434|GO:0043542|GO:0045893|GO:0045944|GO:0045944|GO:0048661|GO:0051591|GO:0051607|GO:0060333|GO:0060333|GO:0060334|GO:0060337|GO:…	IPR000980 // SH2 domain // 2.3E-12///IPR013799 // STAT transcription factor, protein interaction // 1.1E-46///IPR013800 // STAT transcription factor, all-alpha // 3.6E-68///IPR013801 // STAT transcription factor, DNA-binding // 1.5E-123///IPR022752 // Signal transducer and activation of transcription 1, TAZ2 binding domain, C-terminal // 1.4E-15		209950///600555///613796///614162		NP_009330///NP_644671	NM_007315///NM_139266	AFFX-HUMISGF3A/M97935_3	Affymetrix Proprietary Database
AFFX-HUMRGE/M10098_5_at	8142.49	8291.69	7477.93	8515.27	6765.63	6272.94	0	0.26929	-0.033524	0.352102	0.0937548	-0.242763	P	P	P	P	P	P	LINC00273	649159					2013-10-23	This probe set was annotated using the Design Representative Id based pipeline to a Entrez Gene identifier using 1 transcripts. // false // Design Representative Id // R		ENST00000385251		chr16p11.2							ENSG00000207986	long intergenic non-protein coding RNA 273	Human Genome U133 Plus 2.0 Array	February 2009 (Genome Reference Consortium GRCh37)							NM_001040069///NR_038368	AFFX-HUMRGE/M10098_5	Affymetrix Proprietary Database
AFFX-HUMRGE/M10098_M_at	5870	5743.44	4489.81	6121.9	4174.32	4384.07	0	0.21165	-0.297399	0.348137	-0.130817	-0.287526	P	P	P	P	P	P							2013-10-23	This probe set was annotated using the Design Representative Id based pipeline to a GenBank identifier using 4 transcripts. // false // Design Representative Id // R		M10098											Human Genome U133 Plus 2.0 Array	February 2009 (Genome Reference Consortium GRCh37)								AFFX-HUMRGE/M10098_M	Affymetrix Proprietary Database
AFFX-HUMRGE/M10098_3_at	4779.13	1775.2	1665.1	311.735	605.798	305.366	1.18567	0	-0.246157	-2.46517	-1.43316	-2.6489	P	P	P	P	P	P							2013-10-23	This probe set was annotated using the Design Representative Id based pipeline to a GenBank identifier using 4 transcripts. // false // Design Representative Id // R		M10098											Human Genome U133 Plus 2.0 Array	February 2009 (Genome Reference Consortium GRCh37)								AFFX-HUMRGE/M10098_3	Affymetrix Proprietary Database
AFFX-HUMGAPDH/M33197_5_at	10233.9	9656.36	9898.49	10549.1	10275	9924.58	-0.0412335	0.118057	0	0.29005	0.325551	0.0480547	P	P	P	P	P	P	GAPDH	2597	0000226 // microtubule cytoskeleton organization // inferred from sequence or structural similarity///0005975 // carbohydrate metabolic process // traceable author statement///0006006 // glucose metabolic process // traceable author statement///0006094 // gluconeogenesis // traceable author statement///0006096 // glycolysis // inferred from electronic annotation///0006096 // glycolysis // non-tra…	0005634 // nucleus // inferred from sequence or structural similarity///0005737 // cytoplasm // inferred from direct assay///0005737 // cytoplasm // inferred from sequence or structural similarity///0005737 // cytoplasm // non-traceable author statement///0005811 // lipid particle // inferred from direct assay///0005829 // cytosol // inferred from sequence or structural similarity///0005829 // cy…	0004365 // glyceraldehyde-3-phosphate dehydrogenase (NAD+) (phosphorylating) activity // inferred from sequence or structural similarity///0004365 // glyceraldehyde-3-phosphate dehydrogenase (NAD+) (phosphorylating) activity // non-traceable author statement///0005515 // protein binding // inferred from physical interaction///0008017 // microtubule binding // inferred from sequence or structural …		2013-10-23	This probe set was annotated using the Design Representative Id based pipeline to a Entrez Gene identifier using 2 transcripts. // false // Design Representative Id // R		M33197		chr12p13						EC:1.2.1.12	ENSG00000111640	glyceraldehyde-3-phosphate dehydrogenase	Human Genome U133 Plus 2.0 Array	February 2009 (Genome Reference Consortium GRCh37)	GO:0000226|GO:0005975|GO:0006006|GO:0006094|GO:0006096|GO:0006096|GO:0006096|GO:0006417|GO:0006915|GO:0017148|GO:0017148|GO:0035606|GO:0044281|GO:0050821|GO:0051402|GO:0055114|GO:0071346|GO:0005634|GO:0005737|GO:0005737|GO:0005737|GO:0005811|GO:0005829|GO:0005829|GO:0005856|GO:0005886|GO:0015630|GO:0016020|GO:0030529|GO:0048471|GO:0070062|GO:0004365|GO:0004365|GO:0005515|GO:0008017|GO:0016491|GO:…			138400	Glycolysis_and_Gluconeogenesis // GenMAPP	NP_001243728///NP_002037	NM_001256799///NM_002046	AFFX-HUMGAPDH/M33197_5	Affymetrix Proprietary Database
AFFX-HUMGAPDH/M33197_M_at	9152.76	9416.26	9422.44	9515.28	9865.5	8603.72	-0.131202	0.152839	0	0.212357	0.337986	-0.0868816	P	P	P	P	P	P	GAPDH	2597	0000226 // microtubule cytoskeleton organization // inferred from sequence or structural similarity///0005975 // carbohydrate metabolic process // traceable author statement///0006006 // glucose metabolic process // traceable author statement///0006094 // gluconeogenesis // traceable author statement///0006096 // glycolysis // inferred from electronic annotation///0006096 // glycolysis // non-tra…	0005634 // nucleus // inferred from sequence or structural similarity///0005737 // cytoplasm // inferred from direct assay///0005737 // cytoplasm // inferred from sequence or structural similarity///0005737 // cytoplasm // non-traceable author statement///0005811 // lipid particle // inferred from direct assay///0005829 // cytosol // inferred from sequence or structural similarity///0005829 // cy…	0004365 // glyceraldehyde-3-phosphate dehydrogenase (NAD+) (phosphorylating) activity // inferred from sequence or structural similarity///0004365 // glyceraldehyde-3-phosphate dehydrogenase (NAD+) (phosphorylating) activity // non-traceable author statement///0005515 // protein binding // inferred from physical interaction///0008017 // microtubule binding // inferred from sequence or structural …		2013-10-23	This probe set was annotated using the Design Representative Id based pipeline to a Entrez Gene identifier using 2 transcripts. // false // Design Representative Id // R		M33197		chr12p13						EC:1.2.1.12	ENSG00000111640	glyceraldehyde-3-phosphate dehydrogenase	Human Genome U133 Plus 2.0 Array	February 2009 (Genome Reference Consortium GRCh37)	GO:0000226|GO:0005975|GO:0006006|GO:0006094|GO:0006096|GO:0006096|GO:0006096|GO:0006417|GO:0006915|GO:0017148|GO:0017148|GO:0035606|GO:0044281|GO:0050821|GO:0051402|GO:0055114|GO:0071346|GO:0005634|GO:0005737|GO:0005737|GO:0005737|GO:0005811|GO:0005829|GO:0005829|GO:0005856|GO:0005886|GO:0015630|GO:0016020|GO:0030529|GO:0048471|GO:0070062|GO:0004365|GO:0004365|GO:0005515|GO:0008017|GO:0016491|GO:…			138400	Glycolysis_and_Gluconeogenesis // GenMAPP	NP_001243728///NP_002037	NM_001256799///NM_002046	AFFX-HUMGAPDH/M33197_M	Affymetrix Proprietary Database
AFFX-HUMGAPDH/M33197_3_at	9516.56	9703.52	10489.6	10622	10078.1	9391.65	-0.229754	0.04141	0	0.21631	0.213958	-0.11525	P	P	P	P	P	P	GAPDH	2597	0000226 // microtubule cytoskeleton organization // inferred from sequence or structural similarity///0005975 // carbohydrate metabolic process // traceable author statement///0006006 // glucose metabolic process // traceable author statement///0006094 // gluconeogenesis // traceable author statement///0006096 // glycolysis // inferred from electronic annotation///0006096 // glycolysis // non-tra…	0005634 // nucleus // inferred from sequence or structural similarity///0005737 // cytoplasm // inferred from direct assay///0005737 // cytoplasm // inferred from sequence or structural similarity///0005737 // cytoplasm // non-traceable author statement///0005811 // lipid particle // inferred from direct assay///0005829 // cytosol // inferred from sequence or structural similarity///0005829 // cy…	0004365 // glyceraldehyde-3-phosphate dehydrogenase (NAD+) (phosphorylating) activity // inferred from sequence or structural similarity///0004365 // glyceraldehyde-3-phosphate dehydrogenase (NAD+) (phosphorylating) activity // non-traceable author statement///0005515 // protein binding // inferred from physical interaction///0008017 // microtubule binding // inferred from sequence or structural …		2013-10-23	This probe set was annotated using the Design Representative Id based pipeline to a Entrez Gene identifier using 1 transcripts. // false // Design Representative Id // R		M33197		chr12p13						EC:1.2.1.12		glyceraldehyde-3-phosphate dehydrogenase	Human Genome U133 Plus 2.0 Array	February 2009 (Genome Reference Consortium GRCh37)	GO:0000226|GO:0005975|GO:0006006|GO:0006094|GO:0006096|GO:0006096|GO:0006096|GO:0006417|GO:0006915|GO:0017148|GO:0017148|GO:0035606|GO:0044281|GO:0050821|GO:0051402|GO:0055114|GO:0071346|GO:0005634|GO:0005737|GO:0005737|GO:0005737|GO:0005811|GO:0005829|GO:0005829|GO:0005856|GO:0005886|GO:0015630|GO:0016020|GO:0030529|GO:0048471|GO:0070062|GO:0004365|GO:0004365|GO:0005515|GO:0008017|GO:0016491|GO:…			138400	Glycolysis_and_Gluconeogenesis // GenMAPP	NP_001243728///NP_002037	NM_001256799///NM_002046	AFFX-HUMGAPDH/M33197_3	Affymetrix Proprietary Database
AFFX-HSAC07/X00351_5_at	10101.5	9510.57	9873.53	10310.1	10598.6	10153.8	-0.0563798	0.09975	0	0.260627	0.373934	0.0846386	P	P	P	P	P	P	ACTB	60	0006457 // protein folding // traceable author statement///0006928 // cellular component movement // traceable author statement///0007409 // axonogenesis // inferred from electronic annotation///0007411 // axon guidance // traceable author statement///0007596 // blood coagulation // traceable author statement///0016044 // cellular membrane organization // traceable author statement///0034329 // c…	0005737 // cytoplasm // traceable author statement///0005829 // cytosol // traceable author statement///0005856 // cytoskeleton // traceable author statement///0014069 // postsynaptic density // inferred from electronic annotation///0015629 // actin cytoskeleton // inferred from electronic annotation///0030016 // myofibril // inferred from electronic annotation///0030424 // axon // inferred from …	0000166 // nucleotide binding // inferred from electronic annotation///0005200 // structural constituent of cytoskeleton // traceable author statement///0005515 // protein binding // inferred from physical interaction///0005524 // ATP binding // inferred from electronic annotation///0019894 // kinesin binding // inferred from physical interaction///0019901 // protein kinase binding // inferred fr…		2013-10-23	This probe set was annotated using the Design Representative Id based pipeline to a Entrez Gene identifier using 2 transcripts. // false // Design Representative Id // R		X00351		chr7p22							ENSG00000075624	actin, beta	Human Genome U133 Plus 2.0 Array	February 2009 (Genome Reference Consortium GRCh37)	GO:0006457|GO:0006928|GO:0007409|GO:0007411|GO:0007596|GO:0016044|GO:0034329|GO:0034332|GO:0038096|GO:0044267|GO:0045087|GO:0045214|GO:0045216|GO:0051084|GO:0005737|GO:0005829|GO:0005856|GO:0014069|GO:0015629|GO:0030016|GO:0030424|GO:0030529|GO:0030863|GO:0031941|GO:0035267|GO:0043234|GO:0070062|GO:0070688|GO:0000166|GO:0005200|GO:0005515|GO:0005524|GO:0019894|GO:0019901|GO:0030957|GO:0050998	IPR004000 // Actin-related protein // 1.3E-37		102630///243310///607371	Smooth_muscle_contraction // GenMAPP	NP_001092	NM_001101	AFFX-HSAC07/X00351_5	Affymetrix Proprietary Database
AFFX-HSAC07/X00351_M_at	10135.5	10222.6	9919.54	10082.7	11155.9	9428.27	-0.0582299	0.1972	0	0.22175	0.441157	-0.0290232	P	P	P	P	P	P	ACTB	60	0006457 // protein folding // traceable author statement///0006928 // cellular component movement // traceable author statement///0007409 // axonogenesis // inferred from electronic annotation///0007411 // axon guidance // traceable author statement///0007596 // blood coagulation // traceable author statement///0016044 // cellular membrane organization // traceable author statement///0034329 // c…	0005737 // cytoplasm // traceable author statement///0005829 // cytosol // traceable author statement///0005856 // cytoskeleton // traceable author statement///0014069 // postsynaptic density // inferred from electronic annotation///0015629 // actin cytoskeleton // inferred from electronic annotation///0030016 // myofibril // inferred from electronic annotation///0030424 // axon // inferred from …	0000166 // nucleotide binding // inferred from electronic annotation///0005200 // structural constituent of cytoskeleton // traceable author statement///0005515 // protein binding // inferred from physical interaction///0005524 // ATP binding // inferred from electronic annotation///0019894 // kinesin binding // inferred from physical interaction///0019901 // protein kinase binding // inferred fr…		2013-10-23	This probe set was annotated using the Design Representative Id based pipeline to a Entrez Gene identifier using 2 transcripts. // false // Design Representative Id // R		X00351		chr7p22							ENSG00000075624	actin, beta	Human Genome U133 Plus 2.0 Array	February 2009 (Genome Reference Consortium GRCh37)	GO:0006457|GO:0006928|GO:0007409|GO:0007411|GO:0007596|GO:0016044|GO:0034329|GO:0034332|GO:0038096|GO:0044267|GO:0045087|GO:0045214|GO:0045216|GO:0051084|GO:0005737|GO:0005829|GO:0005856|GO:0014069|GO:0015629|GO:0030016|GO:0030424|GO:0030529|GO:0030863|GO:0031941|GO:0035267|GO:0043234|GO:0070062|GO:0070688|GO:0000166|GO:0005200|GO:0005515|GO:0005524|GO:0019894|GO:0019901|GO:0030957|GO:0050998			102630///243310///607371	Smooth_muscle_contraction // GenMAPP	NP_001092	NM_001101	AFFX-HSAC07/X00351_M	Affymetrix Proprietary Database
AFFX-HSAC07/X00351_3_at	11129.3	10205.4	10598.3	10436	10936	10803.1	-0.0187802	0.0992875	0	0.175942	0.316938	0.0718594	P	P	P	P	P	P	ACTB	60	0006457 // protein folding // traceable author statement///0006928 // cellular component movement // traceable author statement///0007409 // axonogenesis // inferred from electronic annotation///0007411 // axon guidance // traceable author statement///0007596 // blood coagulation // traceable author statement///0016044 // cellular membrane organization // traceable author statement///0034329 // c…	0005737 // cytoplasm // traceable author statement///0005829 // cytosol // traceable author statement///0005856 // cytoskeleton // traceable author statement///0014069 // postsynaptic density // inferred from electronic annotation///0015629 // actin cytoskeleton // inferred from electronic annotation///0030016 // myofibril // inferred from electronic annotation///0030424 // axon // inferred from …	0000166 // nucleotide binding // inferred from electronic annotation///0005200 // structural constituent of cytoskeleton // traceable author statement///0005515 // protein binding // inferred from physical interaction///0005524 // ATP binding // inferred from electronic annotation///0019894 // kinesin binding // inferred from physical interaction///0019901 // protein kinase binding // inferred fr…		2013-10-23	This probe set was annotated using the Design Representative Id based pipeline to a Entrez Gene identifier using 2 transcripts. // false // Design Representative Id // R		X00351		chr7p22							ENSG00000075624	actin, beta	Human Genome U133 Plus 2.0 Array	February 2009 (Genome Reference Consortium GRCh37)	GO:0006457|GO:0006928|GO:0007409|GO:0007411|GO:0007596|GO:0016044|GO:0034329|GO:0034332|GO:0038096|GO:0044267|GO:0045087|GO:0045214|GO:0045216|GO:0051084|GO:0005737|GO:0005829|GO:0005856|GO:0014069|GO:0015629|GO:0030016|GO:0030424|GO:0030529|GO:0030863|GO:0031941|GO:0035267|GO:0043234|GO:0070062|GO:0070688|GO:0000166|GO:0005200|GO:0005515|GO:0005524|GO:0019894|GO:0019901|GO:0030957|GO:0050998			102630///243310///607371	Smooth_muscle_contraction // GenMAPP	NP_001092	NM_001101	AFFX-HSAC07/X00351_3	Affymetrix Proprietary Database
AFFX-M27830_5_at	3189.45	3451.43	3823.89	530.967	1407.84	438.044	-0.351041	0.00593805	0	-2.65014	-1.16986	-3.08164	P	P	P	P	P	P							2013-10-23	This probe set was annotated using the Design Representative Id based pipeline to a GenBank identifier using 4 transcripts. // false // Design Representative Id // R		M27830											Human Genome U133 Plus 2.0 Array	February 2009 (Genome Reference Consortium GRCh37)								AFFX-M27830_5	Affymetrix Proprietary Database
AFFX-M27830_M_at	948.223	539.31	507.884	464.508	340.06	523.29	0.571016	0	-0.240403	-0.170989	-0.547419	-0.153034	P	P	P	P	P	P							2013-10-23	This probe set was annotated using the Design Representative Id based pipeline to a GenBank identifier using 4 transcripts. // false // Design Representative Id // R		M27830											Human Genome U133 Plus 2.0 Array	February 2009 (Genome Reference Consortium GRCh37)								AFFX-M27830_M	Affymetrix Proprietary Database
AFFX-M27830_3_at	9.34442	14.9332	6.28893	8.46647	7.05602	38.0431	0	0.91944	-0.481981	0.145175	-0.0442469	2.15902	A	A	A	A	A	A							2013-10-23	This probe set was annotated using the Design Representative Id based pipeline to a GenBank identifier using 4 transcripts. // false // Design Representative Id // R		M27830											Human Genome U133 Plus 2.0 Array	February 2009 (Genome Reference Consortium GRCh37)								AFFX-M27830_3	Affymetrix Proprietary Database
AFFX-hum_alu_at	12222.3	11482.1	12395.5	12086.8	11459.5	11298.6	-0.109603	0.0433574	0	0.161829	0.158422	-0.0894175	P	P	P	P	P	P							2013-10-23	This probe set was annotated using the Design Representative Id based pipeline to a GenBank identifier using 4 transcripts. // false // Design Representative Id // R		U14573											Human Genome U133 Plus 2.0 Array	February 2009 (Genome Reference Consortium GRCh37)								AFFX-hum_alu	Affymetrix Proprietary Database
1007_s_at	102.08	119.846	151.938	89.9007	56.5707	87.1793	-0.474571	0	0.18852	-0.37035	-0.965142	-0.56865	P	P	P	P	P	P	DDR1///MIR4640	780///100616237	0001558 // regulation of cell growth // inferred from electronic annotation///0001952 // regulation of cell-matrix adhesion // inferred from electronic annotation///0006468 // protein phosphorylation // inferred from electronic annotation///0007155 // cell adhesion // traceable author statement///0007169 // transmembrane receptor protein tyrosine kinase signaling pathway // inferred from electron…	0005576 // extracellular region // inferred from electronic annotation///0005886 // plasma membrane // inferred from electronic annotation///0005886 // plasma membrane // traceable author statement///0005887 // integral to plasma membrane // traceable author statement///0016020 // membrane // inferred from electronic annotation///0016021 // integral to membrane // inferred from electronic annotat…	0000166 // nucleotide binding // inferred from electronic annotation///0004672 // protein kinase activity // inferred from electronic annotation///0004713 // protein tyrosine kinase activity // inferred from electronic annotation///0004714 // transmembrane receptor protein tyrosine kinase activity // traceable author statement///0005515 // protein binding // inferred from physical interaction///0…	chr6:30856165-30867931 (+) // 95.63 // p21.33	2013-10-23	This probe set was annotated using the Matching Probes based pipeline to a Entrez Gene identifier using 103 transcripts. // true // Matching Probes // A	AK291621 // gb // 8 // Cross Hyb Matching Probes///ENST00000548693 // ensembl // 2 // Cross Hyb Matching Probes///ENST00000418800 // ensembl // 8 // Cross Hyb Matching Probes///ENST00000361741 // ensembl // 2 // Cross Hyb Matching Probes///ENST00000550666 // ensembl // 2 // Cross Hyb Matching Probes///ENST00000552434 // ensembl // 2 // Cross Hyb Matching Probes///OTTHUMT00000257572 // vega // 8 /…	uc010jse.3(16),uc003nrq.3(16),uc003nrr.3(16),uc003nrs.3(16),uc003nrt.3(16),uc011dms.2(16),uc003nru.3(16),uc003nrv.3(16),uc003nry.2(16),uc003nrx.2(16),uc011ezy.2(16),uc011ezz.2(16),uc011faa.2(16),uc011fab.2(16),uc011fac.2(16),uc011fad.2(16),uc011faf.2(16),uc011fah.2(16),uc011faj.2(16),uc011fak.2(16),uc011fyk.2(16),uc011fyl.2(16),uc011fym.2(16),uc011fyn.2(16),uc011fyo.2(16),uc011fyp.2(16),uc011fyr.…		chr6p21.3	30867931	chr6	95.63	30856165	+	EC:2.7.10.1	ENSG00000137332///ENSG00000204580///ENSG00000215522///ENSG00000230456///ENSG00000234078///OTTHUMG00000004835///OTTHUMG00000031236///OTTHUMG00000031536///OTTHUMG00000148940///OTTHUMG00000149219	discoidin domain receptor tyrosine kinase 1///microRNA 4640	Human Genome U133 Plus 2.0 Array	February 2009 (Genome Reference Consortium GRCh37)	GO:0001558|GO:0001952|GO:0006468|GO:0007155|GO:0007169|GO:0007565|GO:0007566|GO:0007595|GO:0008285|GO:0010715|GO:0014909|GO:0016310|GO:0018108|GO:0030198|GO:0031100|GO:0038063|GO:0038063|GO:0038083|GO:0043583|GO:0043588|GO:0044319|GO:0046777|GO:0060444|GO:0060749|GO:0061302|GO:0005576|GO:0005886|GO:0005886|GO:0005887|GO:0016020|GO:0016021|GO:0016323|GO:0000166|GO:0004672|GO:0004713|GO:0004714|GO:…	IPR000421 // Coagulation factor 5/8 C-terminal type domain // 1.4E-24///IPR000421 // Coagulation factor 5/8 C-terminal type domain // 1.3E-24///IPR000421 // Coagulation factor 5/8 C-terminal type domain // 3.5E-26///IPR000719 // Protein kinase, catalytic domain // 7.2E-45///IPR000719 // Protein kinase, catalytic domain // 6.6E-45///IPR000719 // Protein kinase, catalytic domain // 6.2E-45///IPR000…		600408		NP_001189450///NP_001189451///NP_001189452///NP_001945///NP_054699///NP_054700	NM_001202521///NM_001202522///NM_001202523///NM_001954///NM_013993///NM_013994///NR_039783	U48705	Affymetrix Proprietary Database
1053_at	104.564	55.861	125.478	118.479	141.808	218.377	0	-0.661382	0.352354	0.467763	0.800555	1.196	P	P	P	P	P	P	RFC2	5982	0000075 // cell cycle checkpoint // traceable author statement///0000084 // S phase of mitotic cell cycle // traceable author statement///0000278 // mitotic cell cycle // traceable author statement///0000722 // telomere maintenance via recombination // traceable author statement///0000723 // telomere maintenance // traceable author statement///0006260 // DNA replication // traceable author statem…	0005634 // nucleus // inferred from electronic annotation///0005654 // nucleoplasm // traceable author statement///0005663 // DNA replication factor C complex // inferred from direct assay	0000166 // nucleotide binding // inferred from electronic annotation///0003677 // DNA binding // inferred from electronic annotation///0005515 // protein binding // inferred from physical interaction///0005524 // ATP binding // inferred from electronic annotation///0016851 // magnesium chelatase activity // inferred from electronic annotation///0017111 // nucleoside-triphosphatase activity // inf…	chr7:73646002-73668732 (-) // 70.86 // q11.23	2013-10-23	This probe set was annotated using the Matching Probes based pipeline to a Entrez Gene identifier using 14 transcripts. // false // Matching Probes // A	ENST00000470266 // ensembl // 4 // Cross Hyb Matching Probes///ENST00000494019 // ensembl // 4 // Cross Hyb Matching Probes///ENST00000480432 // ensembl // 4 // Cross Hyb Matching Probes///ENST00000570552 // ensembl // 4 // Cross Hyb Matching Probes///ENST00000572571 // ensembl // 4 // Cross Hyb Matching Probes///ENST00000576356 // ensembl // 4 // Cross Hyb Matching Probes///ENST00000415505 // en…	AB451243(9),BC002813(13),BT007058(9),ENST00000055077(13),ENST00000352131(13),ENST00000485545(13),ENST00000497430(9),ENST00000573234(13),ENST00000576165(9),ENST00000576280(13),ENST00000576908(13),M87338(16),NM_002914(13),NM_181471(13)		chr7q11.23	73668732	chr7	70.86	73646002	-		ENSG00000049541///ENSG00000261911///OTTHUMG00000023239	replication factor C (activator 1) 2, 40kDa	Human Genome U133 Plus 2.0 Array	February 2009 (Genome Reference Consortium GRCh37)	GO:0000075|GO:0000084|GO:0000278|GO:0000722|GO:0000723|GO:0006260|GO:0006271|GO:0006281|GO:0006283|GO:0006289|GO:0006297|GO:0015979|GO:0015995|GO:0032201|GO:0005634|GO:0005654|GO:0005663|GO:0000166|GO:0003677|GO:0005515|GO:0005524|GO:0016851|GO:0017111	IPR000523 // Magnesium chelatase, ChlI subunit // 2.3E-8///IPR003959 // ATPase, AAA-type, core // 1.8E-16///IPR013748 // Replication factor C, C-terminal domain // 8.0E-31///IPR013748 // Replication factor C, C-terminal domain // 1.2E-30///IPR013748 // Replication factor C, C-terminal domain // 1.9E-21///IPR027351 // (+) RNA virus helicase core domain // 2.3E-8		600404	DNA_replication_Reactome // GenMAPP	NP_002905///NP_852136	NM_002914///NM_181471	M87338	GenBank
117_at	15.3043	15.1399	20.5595	13.679	1.51801	25.1374	-0.227506	0	0.28767	-0.101961	-3.20019	0.621953	P	P	P	P	A	P	HSPA6	3310	0000902 // cell morphogenesis // inferred from electronic annotation///0006950 // response to stress // inferred from electronic annotation///0006986 // response to unfolded protein // traceable author statement	0008180 // signalosome // inferred from direct assay	0000166 // nucleotide binding // inferred from electronic annotation///0005524 // ATP binding // inferred from electronic annotation	chr1:161494448-161496380 (+) // 99.59 // q23.3///chr1:161576080-161578007 (+) // 98.03 // q23.3	2013-10-23	This probe set was annotated using the Matching Probes based pipeline to a Entrez Gene identifier using 4 transcripts. // false // Matching Probes // A	n326353 // noncode // 3 // Cross Hyb Matching Probes	AK295212(16),BC035665(16),ENST00000309758(16),NM_002155(16)		chr1q23	161496380	chr1	99.59	161494448	+		ENSG00000173110///ENSG00000225217///OTTHUMG00000034461///OTTHUMG00000074098	heat shock 70kDa protein 6 (HSP70B')	Human Genome U133 Plus 2.0 Array	February 2009 (Genome Reference Consortium GRCh37)	GO:0000902|GO:0006950|GO:0006986|GO:0008180|GO:0000166|GO:0005524	IPR004753 // Cell shape determining protein MreB/Mrl // 2.9E-19///IPR013126 // Heat shock protein 70 family // 3.7E-276		140555		NP_002146	NM_002155	X51757	Affymetrix Proprietary Database
121_at	152.596	115.717	109.299	121.583	85.949	136.471	0.156022	0	-0.236101	0.115768	-0.311137	0.128465	P	P	P	P	P	P	PAX8	7849	0001655 // urogenital system development // inferred from sequence or structural similarity///0001656 // metanephros development // inferred from electronic annotation///0001658 // branching involved in ureteric bud morphogenesis // inferred from expression pattern///0001822 // kidney development // inferred from expression pattern///0001823 // mesonephros development // inferred from sequence or…	0005634 // nucleus // inferred from direct assay///0005654 // nucleoplasm // inferred from sequence or structural similarity///0005730 // nucleolus // inferred from direct assay	0000979 // RNA polymerase II core promoter sequence-specific DNA binding // inferred from direct assay///0003677 // DNA binding // inferred from direct assay///0003677 // DNA binding // inferred from mutant phenotype///0003700 // sequence-specific DNA binding transcription factor activity // inferred from direct assay///0004996 // thyroid-stimulating hormone receptor activity // traceable author …	chr2:113974939-114036488 (-) // 98.3 // q13	2013-10-23	This probe set was annotated using the Matching Probes based pipeline to a Entrez Gene identifier using 10 transcripts. // false // Matching Probes // A	AK124991 // gb // 3 // Cross Hyb Matching Probes///GENSCAN00000041931 // ensembl // 1 // Cross Hyb Matching Probes	BC001060(15),CR936798(15),ENST00000263335(14),ENST00000348715(14),ENST00000397647(14),ENST00000429538(14),NM_003466(14),NM_013952(14),NM_013953(14),NM_013992(14)		chr2q13	114036488	chr2	98.3	113974939	-		ENSG00000125618///OTTHUMG00000128529	paired box 8	Human Genome U133 Plus 2.0 Array	February 2009 (Genome Reference Consortium GRCh37)	GO:0001655|GO:0001656|GO:0001658|GO:0001822|GO:0001823|GO:0003337|GO:0006351|GO:0006355|GO:0007275|GO:0007417|GO:0009653|GO:0030154|GO:0030878|GO:0030878|GO:0039003|GO:0042472|GO:0042981|GO:0045893|GO:0045893|GO:0045944|GO:0048793|GO:0071371|GO:0071599|GO:0072050|GO:0072073|GO:0072108|GO:0072164|GO:0072207|GO:0072221|GO:0072278|GO:0072284|GO:0072289|GO:0072305|GO:0072307|GO:0090190|GO:1900212|GO:…	IPR001523 // Paired domain // 1.4E-75///IPR001523 // Paired domain // 1.1E-75///IPR001523 // Paired domain // 2.2E-75///IPR001523 // Paired domain // 5.5E-75///IPR022130 // Paired-box protein 2 C-terminal // 7.5E-53		167415///218700		NP_003457///NP_039246///NP_039247///NP_054698	NM_003466///NM_013951///NM_013952///NM_013953///NM_013992	X69699	GenBank
1255_g_at	2.28575	3.87621	8.09839	7.44793	3.45526	20.8727	-1.00507	0	0.909202	0.986618	-0.0479436	2.31937	A	A	A	A	A	A	GUCA1A	2978	0007165 // signal transduction // non-traceable author statement///0007601 // visual perception // inferred from electronic annotation///0007602 // phototransduction // inferred from electronic annotation///0007603 // phototransduction, visible light // traceable author statement///0016056 // rhodopsin mediated signaling pathway // traceable author statement///0022400 // regulation of rhodopsin m…	0005578 // proteinaceous extracellular matrix // inferred from electronic annotation///0016020 // membrane // inferred from electronic annotation///0097381 // photoreceptor disc membrane // traceable author statement	0005509 // calcium ion binding // inferred from electronic annotation///0008048 // calcium sensitive guanylate cyclase activator activity // inferred from electronic annotation///0030249 // guanylate cyclase regulator activity // inferred from electronic annotation///0046872 // metal ion binding // inferred from electronic annotation	chr6:42140941-42147792 (+) // 90.58 // p21.1	2013-10-23	This probe set was annotated using the Matching Probes based pipeline to a Entrez Gene identifier using 6 transcripts. // false // Matching Probes // A		AK125780(16),BC031663(16),ENST00000053469(16),ENST00000372958(16),ENST00000394237(16),NM_000409(16)		chr6p21.1	42147792	chr6	90.58	42140941	+		ENSG00000048545///OTTHUMG00000014696	guanylate cyclase activator 1A (retina)	Human Genome U133 Plus 2.0 Array	February 2009 (Genome Reference Consortium GRCh37)	GO:0007165|GO:0007601|GO:0007602|GO:0007603|GO:0016056|GO:0022400|GO:0031282|GO:0050896|GO:0005578|GO:0016020|GO:0097381|GO:0005509|GO:0008048|GO:0030249|GO:0046872	IPR019577 // SPARC/Testican, calcium-binding domain // 1.1E-8		600364///602093		NP_000400	NM_000409	L36861	Affymetrix Proprietary Database
1294_at	23.9876	29.6035	27.9478	22.7846	25.2176	26.6703	-0.309753	0.236816	0	-0.0964699	0.123387	-0.0232463	A	A	A	M	A	A	MIR5193///UBA7	7318///100847079	0006464 // cellular protein modification process // inferred from direct assay///0016567 // protein ubiquitination // inferred from electronic annotation///0019221 // cytokine-mediated signaling pathway // traceable author statement///0019941 // modification-dependent protein catabolic process // inferred from electronic annotation///0032020 // ISG15-protein conjugation // inferred from direct as…	0005829 // cytosol // traceable author statement	0000166 // nucleotide binding // inferred from electronic annotation///0003824 // catalytic activity // inferred from electronic annotation///0005524 // ATP binding // inferred from electronic annotation///0008641 // small protein activating enzyme activity // inferred from electronic annotation///0016874 // ligase activity // inferred from electronic annotation///0019782 // ISG15 activating enzy…	chr3:49842639-49851423 (-) // 95.09 // p21.31	2013-10-23	This probe set was annotated using the Matching Probes based pipeline to a Entrez Gene identifier using 8 transcripts. // true // Matching Probes // A		uc003cxr.3(16),BC006378(16),BT007026(12),L13852(16),NM_003335(16),GENSCAN00000020140(9),ENST00000333486(16),ENST00000497908(11),OTTHUMT00000350503(16),OTTHUMT00000350504(11)		chr3p21	49851423	chr3	95.09	49842639	-		ENSG00000182179///OTTHUMG00000158267	microRNA 5193///ubiquitin-like modifier activating enzyme 7	Human Genome U133 Plus 2.0 Array	February 2009 (Genome Reference Consortium GRCh37)	GO:0006464|GO:0016567|GO:0019221|GO:0019941|GO:0032020|GO:0032480|GO:0045087|GO:0005829|GO:0000166|GO:0003824|GO:0005524|GO:0008641|GO:0016874|GO:0019782	IPR000127 // Ubiquitin-activating enzyme repeat // 7.0E-10///IPR000127 // Ubiquitin-activating enzyme repeat // 1.1E-28///IPR000594 // UBA/THIF-type NAD/FAD binding fold // 3.9E-22///IPR000594 // UBA/THIF-type NAD/FAD binding fold // 4.6E-37///IPR018965 // Ubiquitin-activating enzyme e1, C-terminal // 1.9E-30///IPR019572 // Ubiquitin-activating enzyme // 1.2E-18		191325	Proteasome_Degradation // GenMAPP	NP_003326	NM_003335///NR_049825	L13852	GenBank
1316_at	81.021	72.8233	85.9758	67.0921	65.1714	76.7606	-0.0891981	0	0.0857434	-0.0738344	-0.0422544	-0.0335646	P	P	P	P	P	P	THRA	7067	0000122 // negative regulation of transcription from RNA polymerase II promoter // inferred from mutant phenotype///0001502 // cartilage condensation // inferred from electronic annotation///0001503 // ossification // inferred from electronic annotation///0002155 // regulation of thyroid hormone mediated signaling pathway // inferred from electronic annotation///0006351 // transcription, DNA-depe…	0000790 // nuclear chromatin // inferred from direct assay///0005634 // nucleus // inferred from direct assay///0005654 // nucleoplasm // traceable author statement///0005737 // cytoplasm // inferred from electronic annotation///0005829 // cytosol // inferred from direct assay	0002153 // steroid receptor RNA activator RNA binding // inferred from electronic annotation///0003677 // DNA binding // inferred from electronic annotation///0003700 // sequence-specific DNA binding transcription factor activity // inferred from direct assay///0003707 // steroid hormone receptor activity // inferred from electronic annotation///0003714 // transcription corepressor activity // tr…	chr17:38219155-38246289 (+) // 97.54 // q21.1	2013-10-23	This probe set was annotated using the Matching Probes based pipeline to a Entrez Gene identifier using 3 transcripts. // false // Matching Probes // A	BC008851 // gb // 8 // Cross Hyb Matching Probes	AB209346(13),ENST00000450525(13),NM_199334(12)		chr17q11.2	38246289	chr17	97.54	38219155	+		ENSG00000126351///OTTHUMG00000133332	thyroid hormone receptor, alpha	Human Genome U133 Plus 2.0 Array	February 2009 (Genome Reference Consortium GRCh37)	GO:0000122|GO:0001502|GO:0001503|GO:0002155|GO:0006351|GO:0006355|GO:0006357|GO:0006366|GO:0006367|GO:0007611|GO:0007623|GO:0008016|GO:0008050|GO:0009409|GO:0009755|GO:0009887|GO:0010467|GO:0010831|GO:0010871|GO:0017055|GO:0030218|GO:0030522|GO:0030522|GO:0030878|GO:0033032|GO:0034144|GO:0042994|GO:0043401|GO:0045892|GO:0045925|GO:0045944|GO:0050994|GO:0071222|GO:2000143|GO:2000189|GO:0000790|GO:…	IPR000536 // Nuclear hormone receptor, ligand-binding, core // 2.7E-37///IPR001628 // Zinc finger, nuclear hormone receptor-type // 2.1E-33		190120///614450	Nuclear_Receptors // GenMAPP	NP_001177847///NP_001177848///NP_003241///NP_955366	NM_001190918///NM_001190919///NM_003250///NM_199334	X55005	Affymetrix Proprietary Database
1320_at	29.9727	20.6354	33.1994	30.1701	9.49019	17.7908	0	-0.295433	0.236813	0.296989	-1.29814	-0.618953	A	A	M	A	A	A	PTPN21	11099	0006470 // protein dephosphorylation // traceable author statement///0016311 // dephosphorylation // inferred from electronic annotation///0035335 // peptidyl-tyrosine dephosphorylation // traceable author statement	0005737 // cytoplasm // inferred from electronic annotation///0005856 // cytoskeleton // inferred from electronic annotation	0004721 // phosphoprotein phosphatase activity // inferred from electronic annotation///0004725 // protein tyrosine phosphatase activity // inferred from electronic annotation///0005515 // protein binding // inferred from physical interaction///0016787 // hydrolase activity // inferred from electronic annotation///0016791 // phosphatase activity // inferred from electronic annotation	chr14:88934480-89016761 (-) // 99.89 // q31.3	2013-10-23	This probe set was annotated using the Matching Probes based pipeline to a Entrez Gene identifier using 8 transcripts. // false // Matching Probes // A		BC143846(16),BC143847(16),ENST00000328736(16),ENST00000536337(16),ENST00000553531(9),ENST00000554270(16),ENST00000556564(16),NM_007039(16)		chr14q31.3	89016761	chr14	99.89	88934480	-	EC:3.1.3.48	ENSG00000070778///OTTHUMG00000170766	protein tyrosine phosphatase, non-receptor type 21	Human Genome U133 Plus 2.0 Array	February 2009 (Genome Reference Consortium GRCh37)	GO:0006470|GO:0016311|GO:0035335|GO:0005737|GO:0005856|GO:0004721|GO:0004725|GO:0005515|GO:0016787|GO:0016791	IPR000242 // Protein-tyrosine phosphatase, receptor/non-receptor type // 1.2E-77///IPR000242 // Protein-tyrosine phosphatase, receptor/non-receptor type // 4.0E-17///IPR018979 // FERM, N-terminal // 7.6E-21///IPR018979 // FERM, N-terminal // 1.4E-8///IPR018980 // FERM, C-terminal PH-like domain // 4.4E-20///IPR019748 // FERM central domain // 3.1E-25		603271		NP_008970	NM_007039	X79510	Affymetrix Proprietary Database
1405_i_at	8.02758	1	1.4877	2.1723	7.11362	1	2.34257	-0.419297	0	0.744353	2.5292	-0.528826	A	A	A	A	A	A	CCL5	6352	0000165 // MAPK cascade // inferred from mutant phenotype///0002407 // dendritic cell chemotaxis // traceable author statement///0002544 // chronic inflammatory response // inferred from electronic annotation///0002548 // monocyte chemotaxis // inferred by curator///0002676 // regulation of chronic inflammatory response // traceable author statement///0006468 // protein phosphorylation // inferre…	0005576 // extracellular region // traceable author statement///0005615 // extracellular space // inferred from electronic annotation///0005737 // cytoplasm // inferred from electronic annotation	0004435 // phosphatidylinositol phospholipase C activity // inferred from direct assay///0004672 // protein kinase activity // inferred from direct assay///0005125 // cytokine activity // inferred from electronic annotation///0005515 // protein binding // inferred from physical interaction///0008009 // chemokine activity // inferred from direct assay///0008009 // chemokine activity // non-traceab…	chr17:34198526-34207330 (-) // 57.16 // q12	2013-10-23	This probe set was annotated using the Matching Probes based pipeline to a Entrez Gene identifier using 4 transcripts. // false // Matching Probes // A		ENST00000293272(14),ENST00000366113(14),M21121(14),NM_002985(14)		chr17q11.2-q12	34207330	chr17	57.16	34198526	-		ENSG00000161570///OTTHUMG00000132949	chemokine (C-C motif) ligand 5	Human Genome U133 Plus 2.0 Array	February 2009 (Genome Reference Consortium GRCh37)	GO:0000165|GO:0002407|GO:0002544|GO:0002548|GO:0002676|GO:0006468|GO:0006816|GO:0006874|GO:0006887|GO:0006935|GO:0006954|GO:0006955|GO:0007159|GO:0007267|GO:0007568|GO:0009615|GO:0009617|GO:0009636|GO:0009651|GO:0010535|GO:0010628|GO:0010759|GO:0010820|GO:0014068|GO:0014070|GO:0014823|GO:0014911|GO:0018894|GO:0030335|GO:0031269|GO:0031328|GO:0031584|GO:0031622|GO:0031663|GO:0031667|GO:0032496|GO:…	IPR001811 // Chemokine interleukin-8-like domain // 2.2E-26		187011		NP_002976	NM_002985	M21121	GenBank
1431_at	6.04349	7.50103	8.81245	15.9336	13.8622	13.0523	-0.554802	0	0.0786676	1.13134	1.0039	0.689608	P	A	M	P	P	P	CYP2E1	1571	0006641 // triglyceride metabolic process // inferred from electronic annotation///0006805 // xenobiotic metabolic process // traceable author statement///0008202 // steroid metabolic process // inferred from mutant phenotype///0010193 // response to ozone // inferred from electronic annotation///0010243 // response to organic nitrogen // inferred from electronic annotation///0016098 // monoterpe…	0000139 // Golgi membrane // inferred from electronic annotation///0005739 // mitochondrion // inferred from electronic annotation///0005783 // endoplasmic reticulum // inferred from electronic annotation///0005789 // endoplasmic reticulum membrane // traceable author statement///0016020 // membrane // inferred from electronic annotation///0031090 // organelle membrane // inferred from electronic…	0004497 // monooxygenase activity // inferred from direct assay///0005506 // iron ion binding // inferred from electronic annotation///0009055 // electron carrier activity // inferred from electronic annotation///0016491 // oxidoreductase activity // inferred from direct assay///0016705 // oxidoreductase activity, acting on paired donors, with incorporation or reduction of molecular oxygen // inf…	chr10:135340899-135352468 (+) // 99.87 // q26.3	2013-10-23	This probe set was annotated using the Matching Probes based pipeline to a Entrez Gene identifier using 12 transcripts. // false // Matching Probes // A	S77873 // gb // 1 // Cross Hyb Matching Probes///ENST00000469258 // ensembl // 5 // Cross Hyb Matching Probes///OTTHUMT00000051165 // vega // 5 // Cross Hyb Matching Probes	AF182276(16),AK290822(16),BC067433(14),BC067435(16),ENST00000252945(13),ENST00000368520(12),ENST00000418356(12),ENST00000421586(12),ENST00000463117(13),ENST00000541080(10),J02625(16),NM_000773(16)		chr10q26.3	135352468	chr10	99.87	135340899	+	EC:1.14.13.n7	ENSG00000130649///OTTHUMG00000019322	cytochrome P450, family 2, subfamily E, polypeptide 1	Human Genome U133 Plus 2.0 Array	February 2009 (Genome Reference Consortium GRCh37)	GO:0006641|GO:0006805|GO:0008202|GO:0010193|GO:0010243|GO:0016098|GO:0017144|GO:0017144|GO:0042493|GO:0044281|GO:0045471|GO:0046483|GO:0055114|GO:0000139|GO:0005739|GO:0005783|GO:0005789|GO:0016020|GO:0031090|GO:0031227|GO:0043231|GO:0004497|GO:0005506|GO:0009055|GO:0016491|GO:0016705|GO:0016709|GO:0016712|GO:0019825|GO:0019899|GO:0020037|GO:0046872|GO:0070330	IPR001128 // Cytochrome P450 // 2.6E-156///IPR001128 // Cytochrome P450 // 4.7E-119///IPR001128 // Cytochrome P450 // 4.8E-104		124040		NP_000764	NM_000773	J02843	Affymetrix Proprietary Database
1438_at	3.35509	2.23024	4.01293	3.4054	2.53912	5.91847	0	-0.346057	0.347613	0.30899	-0.0410228	0.952438	A	A	A	A	A	A	EPHB3	2049	0001525 // angiogenesis // inferred from sequence or structural similarity///0001655 // urogenital system development // inferred from sequence or structural similarity///0006468 // protein phosphorylation // inferred from electronic annotation///0007169 // transmembrane receptor protein tyrosine kinase signaling pathway // inferred from electronic annotation///0007275 // multicellular organismal…	0005886 // plasma membrane // inferred from electronic annotation///0005887 // integral to plasma membrane // inferred from direct assay///0016020 // membrane // inferred from electronic annotation///0016021 // integral to membrane // inferred from electronic annotation///0030425 // dendrite // inferred from electronic annotation///0042995 // cell projection // inferred from electronic annotation	0000166 // nucleotide binding // inferred from electronic annotation///0004672 // protein kinase activity // inferred from electronic annotation///0004713 // protein tyrosine kinase activity // inferred from electronic annotation///0004714 // transmembrane receptor protein tyrosine kinase activity // inferred from electronic annotation///0005003 // ephrin receptor activity // inferred from direct…	chr3:184280023-184299410 (+) // 97.2 // q27.1	2013-10-23	This probe set was annotated using the Matching Probes based pipeline to a Entrez Gene identifier using 3 transcripts. // false // Matching Probes // A		BC052968(16),ENST00000330394(16),NM_004443(16)		chr3q21-qter	184299410	chr3	97.2	184280023	+	EC:2.7.10.1	ENSG00000182580///OTTHUMG00000156710	EPH receptor B3	Human Genome U133 Plus 2.0 Array	February 2009 (Genome Reference Consortium GRCh37)	GO:0001525|GO:0001655|GO:0006468|GO:0007169|GO:0007275|GO:0007399|GO:0007411|GO:0007413|GO:0016310|GO:0016477|GO:0021952|GO:0022038|GO:0022407|GO:0031290|GO:0032314|GO:0034446|GO:0043088|GO:0046777|GO:0048013|GO:0048538|GO:0048546|GO:0050770|GO:0051965|GO:0060021|GO:0060996|GO:0060997|GO:0005886|GO:0005887|GO:0016020|GO:0016021|GO:0030425|GO:0042995|GO:0000166|GO:0004672|GO:0004713|GO:0004714|GO:…	IPR000719 // Protein kinase, catalytic domain // 1.4E-48///IPR001090 // Ephrin receptor ligand binding domain // 3.5E-76///IPR001245 // Serine-threonine/tyrosine-protein kinase catalytic domain // 5.6E-95///IPR003961 // Fibronectin, type III // 2.4E-18///IPR003961 // Fibronectin, type III // 1.7E-17///IPR011510 // Sterile alpha motif, type 2 // 7.2E-25///IPR011641 // Tyrosine-protein kinase ephri…		601839		NP_004434	NM_004443	X75208	Affymetrix Proprietary Database
1487_at	251.722	181.08	181.242	167.391	192.337	230.646	0.232111	0	-0.152498	-0.0689817	0.204923	0.239528	P	P	P	P	P	P	ESRRA	2101	0006351 // transcription, DNA-dependent // inferred from electronic annotation///0006355 // regulation of transcription, DNA-dependent // inferred from electronic annotation///0006367 // transcription initiation from RNA polymerase II promoter // traceable author statement///0010467 // gene expression // traceable author statement///0030278 // regulation of ossification // inferred from electroni…	0005634 // nucleus // traceable author statement///0005654 // nucleoplasm // traceable author statement	0003677 // DNA binding // traceable author statement///0003700 // sequence-specific DNA binding transcription factor activity // inferred from electronic annotation///0003707 // steroid hormone receptor activity // inferred from electronic annotation///0004879 // ligand-activated sequence-specific DNA binding RNA polymerase II transcription factor activity // traceable author statement///0005496 …	chr11:64073043-64084210 (+) // 97.02 // q13.1	2013-10-23	This probe set was annotated using the Matching Probes based pipeline to a Entrez Gene identifier using 9 transcripts. // false // Matching Probes // A		BC011528(16),BC063795(16),BC073956(16),BC092470(16),ENST00000000442(13),ENST00000405666(13),ENST00000406310(13),NM_004451(16),X51416(16)		chr11q13	64084210	chr11	97.02	64073043	+		ENSG00000173153///OTTHUMG00000150641	estrogen-related receptor alpha	Human Genome U133 Plus 2.0 Array	February 2009 (Genome Reference Consortium GRCh37)	GO:0006351|GO:0006355|GO:0006367|GO:0010467|GO:0030278|GO:0030522|GO:0042127|GO:0043401|GO:0045667|GO:0045670|GO:0045893|GO:0045944|GO:0051216|GO:0005634|GO:0005654|GO:0003677|GO:0003700|GO:0003707|GO:0004879|GO:0005496|GO:0005515|GO:0008270|GO:0019904|GO:0043565|GO:0046872	IPR000536 // Nuclear hormone receptor, ligand-binding, core // 1.9E-38///IPR000536 // Nuclear hormone receptor, ligand-binding, core // 1.9E-38///IPR001628 // Zinc finger, nuclear hormone receptor-type // 1.2E-34		601998	Nuclear_Receptors // GenMAPP	NP_004442	NM_004451	L38487	Affymetrix Proprietary Database
1494_f_at	42.5519	28.4225	29.3702	38.5853	25.8843	43.1322	0.339095	0	-0.106465	0.485441	-0.0170474	0.492204	A	M	A	A	A	A	CYP2A6	1548	0006805 // xenobiotic metabolic process // traceable author statement///0008202 // steroid metabolic process // inferred from mutant phenotype///0009804 // coumarin metabolic process // inferred from direct assay///0017144 // drug metabolic process // inferred from direct assay///0017144 // drug metabolic process // inferred from mutant phenotype///0042738 // exogenous drug catabolic process // i…	0005783 // endoplasmic reticulum // inferred from electronic annotation///0005789 // endoplasmic reticulum membrane // traceable author statement///0005881 // cytoplasmic microtubule // inferred from direct assay///0016020 // membrane // inferred from electronic annotation///0031090 // organelle membrane // inferred from electronic annotation///0043231 // intracellular membrane-bounded organelle …	0004497 // monooxygenase activity // inferred from electronic annotation///0005506 // iron ion binding // inferred from electronic annotation///0008389 // coumarin 7-hydroxylase activity // inferred from direct assay///0009055 // electron carrier activity // inferred from electronic annotation///0016491 // oxidoreductase activity // inferred from electronic annotation///0016705 // oxidoreductase …	chr19:41349446-41356339 (-) // 98.4 // q13.2	2013-10-23	This probe set was annotated using the Matching Probes based pipeline to a Entrez Gene identifier using 10 transcripts. // false // Matching Probes // A	uc010ehe.1 // ucsc_genes // 2 // Cross Hyb Matching Probes///uc002opt.3 // ucsc_genes // 3 // Cross Hyb Matching Probes///AK309594 // gb // 2 // Cross Hyb Matching Probes///AF209774 // gb // 3 // Cross Hyb Matching Probes///AY513604 // gb // 3 // Cross Hyb Matching Probes///AY513605 // gb // 3 // Cross Hyb Matching Probes///AY513606 // gb // 3 // Cross Hyb Matching Probes///AY513607 // gb // 3 //…	AF182275(13),BC096253(12),BC096254(13),BC096255(13),BC096256(12),ENST00000301141(14),ENST00000599960(12),M33318(16),NM_000762(15),X06401(15)		chr19q13.2	41356339	chr19	98.4	41349446	-	EC:1.14.14.1	ENSG00000198077///ENSG00000255974///OTTHUMG00000182713///OTTHUMG00000182715	cytochrome P450, family 2, subfamily A, polypeptide 6	Human Genome U133 Plus 2.0 Array	February 2009 (Genome Reference Consortium GRCh37)	GO:0006805|GO:0008202|GO:0009804|GO:0017144|GO:0017144|GO:0042738|GO:0044281|GO:0046226|GO:0055114|GO:0005783|GO:0005789|GO:0005881|GO:0016020|GO:0031090|GO:0043231|GO:0004497|GO:0005506|GO:0008389|GO:0009055|GO:0016491|GO:0016705|GO:0016712|GO:0019825|GO:0019899|GO:0020037|GO:0046872|GO:0070330	IPR001128 // Cytochrome P450 // 2.8E-125///IPR001128 // Cytochrome P450 // 9.6E-152///IPR001128 // Cytochrome P450 // 1.3E-155		122700///122720///188890///211980		NP_000753	NM_000762	M33318	Affymetrix Proprietary Database
1598_g_at	389.645	505.194	393.424	252.168	167.856	239.145	-0.103231	0.51454	0	-0.443485	-0.957163	-0.673942	P	P	P	P	P	P	GAS6	2621	0001764 // neuron migration // inferred from electronic annotation///0001934 // positive regulation of protein phosphorylation // inferred from direct assay///0001934 // positive regulation of protein phosphorylation // inferred from sequence or structural similarity///0001961 // positive regulation of cytokine-mediated signaling pathway // inferred from mutant phenotype///0002576 // platelet deg…	0005576 // extracellular region // traceable author statement///0005615 // extracellular space // inferred from direct assay///0005622 // intracellular // inferred from electronic annotation///0005737 // cytoplasm // inferred from direct assay///0005788 // endoplasmic reticulum lumen // traceable author statement///0005796 // Golgi lumen // traceable author statement///0031093 // platelet alpha g…	0001786 // phosphatidylserine binding // inferred from direct assay///0005102 // receptor binding // inferred from direct assay///0005102 // receptor binding // inferred from physical interaction///0005245 // voltage-gated calcium channel activity // inferred from direct assay///0005509 // calcium ion binding // inferred from electronic annotation///0005515 // protein binding // inferred from phy…	chr13:114523546-114567030 (-) // 96.79 // q34	2013-10-23	This probe set was annotated using the Matching Probes based pipeline to a Entrez Gene identifier using 15 transcripts. // false // Matching Probes // A		AK126533(16),AK290803(15),AK303145(10),AL833761(16),BC038984(16),ENST00000327773(16),ENST00000355761(16),ENST00000357389(16),ENST00000418959(16),ENST00000450766(16),ENST00000480426(16),L13720(16),NM_000820(16),NM_001143945(16),NM_001143946(16)		chr13q34	114567030	chr13	96.79	114523546	-		ENSG00000183087///OTTHUMG00000017395	growth arrest-specific 6	Human Genome U133 Plus 2.0 Array	February 2009 (Genome Reference Consortium GRCh37)	GO:0001764|GO:0001934|GO:0001934|GO:0001961|GO:0002576|GO:0003104|GO:0006468|GO:0006508|GO:0006909|GO:0007050|GO:0007155|GO:0007165|GO:0007165|GO:0007167|GO:0007596|GO:0008283|GO:0009267|GO:0010628|GO:0010804|GO:0010934|GO:0016477|GO:0017187|GO:0018105|GO:0019064|GO:0019079|GO:0030168|GO:0031100|GO:0031589|GO:0032008|GO:0032148|GO:0032689|GO:0032715|GO:0032720|GO:0032825|GO:0033138|GO:0033159|GO:…	IPR000294 // Gamma-carboxyglutamic acid-rich (GLA) domain // 5.8E-18///IPR000294 // Gamma-carboxyglutamic acid-rich (GLA) domain // 6.3E-18///IPR001791 // Laminin G domain // 6.1E-18///IPR001791 // Laminin G domain // 3.7E-16///IPR001791 // Laminin G domain // 1.1E-22///IPR001791 // Laminin G domain // 5.6E-8///IPR001791 // Laminin G domain // 6.8E-18///IPR001791 // Laminin G domain // 4.1E-16///…		600441		NP_000811///NP_001137417///NP_001137418	NM_000820///NM_001143945///NM_001143946	L13720	GenBank
160020_at	2159.09	2222.1	2071.46	1143.7	1535.34	1024.96	-0.0295348	0.255061	0	-0.658726	-0.160401	-0.97083	P	P	P	P	P	P	MMP14	4323	0001503 // ossification // inferred from electronic annotation///0001525 // angiogenesis // inferred from electronic annotation///0001541 // ovarian follicle development // inferred from electronic annotation///0001666 // response to hypoxia // inferred from electronic annotation///0001935 // endothelial cell proliferation // inferred from electronic annotation///0006355 // regulation of transcri…	0005737 // cytoplasm // inferred from direct assay///0005796 // Golgi lumen // traceable author statement///0005886 // plasma membrane // traceable author statement///0005887 // integral to plasma membrane // traceable author statement///0016020 // membrane // inferred from electronic annotation///0016021 // integral to membrane // inferred from electronic annotation///0031012 // extracellular ma…	0003700 // sequence-specific DNA binding transcription factor activity // inferred from electronic annotation///0004222 // metalloendopeptidase activity // inferred from electronic annotation///0005178 // integrin binding // inferred from electronic annotation///0005509 // calcium ion binding // inferred from electronic annotation///0005515 // protein binding // inferred from physical interaction…	chr14:23305807-23316802 (+) // 92.69 // q11.2	2013-10-23	This probe set was annotated using the Matching Probes based pipeline to a Entrez Gene identifier using 2 transcripts. // false // Matching Probes // A		ENST00000311852(16),NM_004995(16)		chr14q11-q12	23316802	chr14	92.69	23305807	+	EC:3.4.24.80	ENSG00000157227///OTTHUMG00000028704	matrix metallopeptidase 14 (membrane-inserted)	Human Genome U133 Plus 2.0 Array	February 2009 (Genome Reference Consortium GRCh37)	GO:0001503|GO:0001525|GO:0001541|GO:0001666|GO:0001935|GO:0006355|GO:0006508|GO:0006979|GO:0008152|GO:0009612|GO:0009725|GO:0010952|GO:0014070|GO:0016477|GO:0022617|GO:0030198|GO:0030307|GO:0030324|GO:0030335|GO:0030574|GO:0031638|GO:0043615|GO:0043627|GO:0048754|GO:0048771|GO:0051895|GO:0005737|GO:0005796|GO:0005886|GO:0005887|GO:0016020|GO:0016021|GO:0031012|GO:0042470|GO:0003700|GO:0004222|GO:…	IPR001818 // Peptidase M10, metallopeptidase // 7.5E-58///IPR002477 // Peptidoglycan binding-like // 2.5E-15///IPR018487 // Hemopexin-like repeats // 1.5E-17///IPR018487 // Hemopexin-like repeats // 2.1E-16///IPR018487 // Hemopexin-like repeats // 6.0E-18///IPR018487 // Hemopexin-like repeats // 2.2E-15///IPR021805 // Peptidase M10A, matrix metallopeptidase, C-terminal // 1.8E-29		600754	Matrix_Metalloproteinases // GenMAPP	NP_004986	NM_004995	Z48481	GenBank
1729_at	146.807	147.765	179.972	136.304	94.5007	136.756	-0.25247	0	0.130691	-0.0720511	-0.526994	-0.22122	P	P	P	P	P	P	TRADD	8717	0006915 // apoptotic process // traceable author statement///0006917 // induction of apoptosis // inferred from direct assay///0006919 // activation of cysteine-type endopeptidase activity involved in apoptotic process // traceable author statement///0007165 // signal transduction // traceable author statement///0008625 // extrinsic apoptotic signaling pathway via death domain receptors // tracea…	0005634 // nucleus // inferred from electronic annotation///0005737 // cytoplasm // inferred from direct assay///0005829 // cytosol // traceable author statement///0005856 // cytoskeleton // inferred from electronic annotation///0043235 // receptor complex // inferred from direct assay	0004871 // signal transducer activity // inferred from electronic annotation///0005515 // protein binding // inferred from physical interaction///0019900 // kinase binding // inferred from physical interaction///0042802 // identical protein binding // inferred from physical interaction///0060090 // binding, bridging // inferred from physical interaction///0070513 // death domain binding // inferr…	chr16:67188103-67193780 (-) // 88.92 // q22.1	2013-10-23	This probe set was annotated using the Matching Probes based pipeline to a Entrez Gene identifier using 5 transcripts. // false // Matching Probes // A	AK315654 // gb // 2 // Cross Hyb Matching Probes///AB209438 // gb // 1 // Cross Hyb Matching Probes///BT006934 // gb // 2 // Cross Hyb Matching Probes///GENSCAN00000036262 // ensembl // 2 // Cross Hyb Matching Probes///ENST00000471490 // ensembl // 1 // Cross Hyb Matching Probes///OTTHUMT00000195764 // vega // 1 // Cross Hyb Matching Probes	AK090673(15),BC004491(15),ENST00000345057(15),ENST00000486556(15),NM_003789(15)		chr16q22	67193780	chr16	88.92	67188103	-		ENSG00000102871///OTTHUMG00000137519	TNFRSF1A-associated via death domain	Human Genome U133 Plus 2.0 Array	February 2009 (Genome Reference Consortium GRCh37)	GO:0006915|GO:0006917|GO:0006919|GO:0007165|GO:0008625|GO:0033209|GO:0043123|GO:0051798|GO:0097190|GO:0097191|GO:0097191|GO:2001239|GO:0005634|GO:0005737|GO:0005829|GO:0005856|GO:0043235|GO:0004871|GO:0005515|GO:0019900|GO:0042802|GO:0060090|GO:0070513	IPR000488 // Death domain // 2.6E-11///IPR000488 // Death domain // 1.8E-11///IPR009095 // TRADD, N-terminal // 4.3E-53///IPR009095 // TRADD, N-terminal // 5.2E-49		603500	Apoptosis // GenMAPP///Apoptosis_GenMAPP // GenMAPP///Apoptosis_KEGG // GenMAPP	NP_003780	NM_003789///NM_153425	L41690	GenBank
1773_at	72.0868	92.0429	78.9835	97.4147	112.072	116.595	-0.221125	0.374542	0	0.500799	0.776491	0.606138	P	P	P	P	P	P	CHURC1-FNTB///FNTB	2342///100529261	0007275 // multicellular organismal development // inferred from electronic annotation///0007603 // phototransduction, visible light // traceable author statement///0008284 // positive regulation of cell proliferation // inferred from electronic annotation///0008285 // negative regulation of cell proliferation // inferred from electronic annotation///0010035 // response to inorganic substance // …	0005829 // cytosol // traceable author statement///0005875 // microtubule associated complex // inferred from direct assay///0005965 // protein farnesyltransferase complex // inferred from electronic annotation///0043234 // protein complex // inferred from electronic annotation	0003824 // catalytic activity // inferred from electronic annotation///0004311 // farnesyltranstransferase activity // inferred from electronic annotation///0004659 // prenyltransferase activity // inferred from electronic annotation///0004660 // protein farnesyltransferase activity // inferred from direct assay///0005515 // protein binding // inferred from physical interaction///0008144 // drug …	chr14:65453653-65528278 (+) // 99.81 // q23.3	2013-10-23	This probe set was annotated using the Matching Probes based pipeline to a Entrez Gene identifier using 20 transcripts. // true // Matching Probes // A	AK024087 // gb // 5 // Cross Hyb Matching Probes	uc010tsl.2(16),uc010tsm.2(16),uc001xia.3(16),uc001xid.3(16),uc010tso.2(16),BX248269(16),AK315714(10),AK093298(16),AK295972(16),AK296850(11),AK303739(16),BC020232(16),L00635(16),L10414(12),NM_002028(16),NM_001202558(16),NM_001202559(16),GENSCAN00000020155(10),ENST00000552941(16),ENST00000549987(11),ENST00000447296(11),ENST00000542227(16),ENST00000448390(16),ENST00000246166(16),ENST00000554334(16),…		chr14q23///chr14q23.3	65528278	chr14	99.81	65453653	+	EC:2.5.1.58	ENSG00000125954///ENSG00000257365///OTTHUMG00000142811///OTTHUMG00000170219	CHURC1-FNTB readthrough///farnesyltransferase, CAAX box, beta	Human Genome U133 Plus 2.0 Array	February 2009 (Genome Reference Consortium GRCh37)	GO:0007275|GO:0007603|GO:0008284|GO:0008285|GO:0010035|GO:0014070|GO:0016056|GO:0018343|GO:0022400|GO:0034097|GO:0042060|GO:0042127|GO:0045787|GO:0045893|GO:0048146|GO:0051770|GO:0005829|GO:0005875|GO:0005965|GO:0043234|GO:0003824|GO:0004311|GO:0004659|GO:0004660|GO:0005515|GO:0008144|GO:0008270|GO:0016740|GO:0019840|GO:0042277|GO:0046872	IPR001330 // Prenyltransferase/squalene oxidase // 8.6E-17///IPR001330 // Prenyltransferase/squalene oxidase // 2.5E-14///IPR001330 // Prenyltransferase/squalene oxidase // 3.9E-16///IPR001330 // Prenyltransferase/squalene oxidase // 3.2E-14///IPR001330 // Prenyltransferase/squalene oxidase // 2.5E-13///IPR001330 // Prenyltransferase/squalene oxidase // 1.9E-16///IPR001330 // Prenyltransferase/sq…		134636		NP_001189487///NP_001189488///NP_002019	NM_001202558///NM_001202559///NM_002028	L00635	GenBank
177_at	116.731	107.797	153.737	140.671	97.586	106.702	-0.128221	0	0.358359	0.428434	-0.0256629	-0.124258	P	P	P	P	P	P	PLD1	5337	0006629 // lipid metabolic process // inferred from electronic annotation///0006644 // phospholipid metabolic process // traceable author statement///0006654 // phosphatidic acid biosynthetic process // traceable author statement///0006655 // phosphatidylglycerol biosynthetic process // traceable author statement///0006935 // chemotaxis // traceable author statement///0007154 // cell communicatio…	0000139 // Golgi membrane // inferred from electronic annotation///0005737 // cytoplasm // inferred from electronic annotation///0005768 // endosome // inferred from direct assay///0005783 // endoplasmic reticulum // inferred from electronic annotation///0005789 // endoplasmic reticulum membrane // traceable author statement///0005794 // Golgi apparatus // inferred from direct assay///0016020 // …	0003824 // catalytic activity // inferred from electronic annotation///0004630 // phospholipase D activity // inferred from electronic annotation///0005515 // protein binding // inferred from electronic annotation///0005515 // protein binding // inferred from physical interaction///0005543 // phospholipid binding // inferred from electronic annotation///0016787 // hydrolase activity // inferred f…	chr3:171320592-171528244 (-) // 99.39 // q26.31	2013-10-23	This probe set was annotated using the Matching Probes based pipeline to a Entrez Gene identifier using 7 transcripts. // false // Matching Probes // A	GENSCAN00000028082 // ensembl // 8 // Cross Hyb Matching Probes	BC068976(16),ENST00000342215(16),ENST00000351298(16),ENST00000356327(16),NM_001130081(16),NM_002662(16),U38545(16)		chr3q26	171528244	chr3	99.39	171320592	-	EC:3.1.4.4	ENSG00000075651///OTTHUMG00000156947	phospholipase D1, phosphatidylcholine-specific	Human Genome U133 Plus 2.0 Array	February 2009 (Genome Reference Consortium GRCh37)	GO:0006629|GO:0006644|GO:0006654|GO:0006655|GO:0006935|GO:0007154|GO:0007264|GO:0007265|GO:0008152|GO:0008654|GO:0009395|GO:0016042|GO:0030335|GO:0043434|GO:0044281|GO:0046474|GO:0050830|GO:0000139|GO:0005737|GO:0005768|GO:0005783|GO:0005789|GO:0005794|GO:0016020|GO:0030027|GO:0031902|GO:0031982|GO:0031985|GO:0048471|GO:0003824|GO:0004630|GO:0005515|GO:0005515|GO:0005543|GO:0016787|GO:0035091|GO:…	IPR001683 // Phox homologous domain // 5.0E-26///IPR001683 // Phox homologous domain // 5.3E-26///IPR001683 // Phox homologous domain // 2.2E-26///IPR001736 // Phospholipase D/Transphosphatidylase // 4.0E-12///IPR001736 // Phospholipase D/Transphosphatidylase // 4.2E-12///IPR001736 // Phospholipase D/Transphosphatidylase // 2.1E-12///IPR001849 // Pleckstrin homology domain // 7.5E-10///IPR001849 …		602382		NP_001123553///NP_002653	NM_001130081///NM_002662	U38545	GenBank
179_at	185.887	136.598	173.967	157.857	155.524	155.571	0.00630999	-0.195091	0	0.0580211	0.110017	-0.116984	A	A	A	A	A	A	DTX2P1-UPK3BP1-PMS2P11	441263	0006200 // ATP catabolic process // ---///0006298 // mismatch repair // ---///0006298 // mismatch repair // inferred from electronic annotation///0007131 // reciprocal meiotic recombination // ---///0016310 // phosphorylation // inferred from electronic annotation///0016446 // somatic hypermutation of immunoglobulin genes // ---	0032300 // mismatch repair complex // ---///0032389 // MutLalpha complex // ---	0003697 // single-stranded DNA binding // ---///0005524 // ATP binding // inferred from electronic annotation///0008270 // zinc ion binding // inferred from electronic annotation///0016301 // kinase activity // inferred from electronic annotation///0016740 // transferase activity // inferred from electronic annotation///0016887 // ATPase activity // ---///0030983 // mismatched DNA binding // infe…	chr7:76610265-76645172 (+) // 94.12 // q11.23	2013-10-23	This probe set was annotated using the Matching Probes based pipeline to a Entrez Gene identifier using 4 transcripts. // false // Matching Probes // A	uc010ldk.1 // ucsc_genes // 4 // Cross Hyb Matching Probes///uc003ufo.3 // ucsc_genes // 4 // Cross Hyb Matching Probes///uc003ufq.3 // ucsc_genes // 4 // Cross Hyb Matching Probes///AK290096 // gb // 4 // Cross Hyb Matching Probes///AY233462 // gb // 4 // Cross Hyb Matching Probes///BC004304 // gb // 4 // Cross Hyb Matching Probes///NM_030570 // refseq // 4 // Cross Hyb Matching Probes///NM_1826…	ENST00000579700(15),ENST00000584900(15),NR_023383(15),U38980(16)		chr7q11.23	76645172	chr7	94.12	76610265	+		ENSG00000186704///ENSG00000242435///ENSG00000265479///OTTHUMG00000155728///OTTHUMG00000179528	DTX2P1-UPK3BP1-PMS2P11 readthrough transcribed pseudogene	Human Genome U133 Plus 2.0 Array	February 2009 (Genome Reference Consortium GRCh37)	GO:0006200|GO:0006298|GO:0006298|GO:0007131|GO:0016310|GO:0016446|GO:0032300|GO:0032389|GO:0003697|GO:0005524|GO:0008270|GO:0016301|GO:0016740|GO:0016887|GO:0030983|GO:0032407						NR_023383	U38980	GenBank
1861_at	132.61	127.87	139.114	151.801	136.516	165.436	-0.158384	0.0322027	0	0.324123	0.244496	0.294262	P	P	P	P	P	P	BAD	572	0001666 // response to hypoxia // inferred from electronic annotation///0006007 // glucose catabolic process // inferred from electronic annotation///0006915 // apoptotic process // traceable author statement///0006917 // induction of apoptosis // inferred from direct assay///0006919 // activation of cysteine-type endopeptidase activity involved in apoptotic process // inferred from sequence or s…	0005737 // cytoplasm // inferred from electronic annotation///0005739 // mitochondrion // inferred from direct assay///0005741 // mitochondrial outer membrane // inferred from direct assay///0005741 // mitochondrial outer membrane // traceable author statement///0005829 // cytosol // inferred from direct assay///0005829 // cytosol // traceable author statement///0016020 // membrane // inferred fr…	0005515 // protein binding // inferred from physical interaction///0005543 // phospholipid binding // inferred from mutant phenotype///0008289 // lipid binding // inferred from direct assay///0008656 // cysteine-type endopeptidase activator activity involved in apoptotic process // inferred from direct assay///0019901 // protein kinase binding // inferred from physical interaction///0019903 // pr…	chr11:64037301-64051883 (-) // 97.38 // q13.1	2013-10-23	This probe set was annotated using the Matching Probes based pipeline to a Entrez Gene identifier using 17 transcripts. // false // Matching Probes // A	AK023420 // gb // 13 // Negative Strand Matching Probes	AB451254(16),AF031523(16),AK291863(16),AK303051(16),BC001901(16),BC095431(16),BT006678(16),CR541935(16),CR541959(16),ENST00000309032(16),ENST00000394531(16),ENST00000394532(16),ENST00000492141(16),ENST00000493798(16),NM_004322(16),NM_032989(16),U66879(16)		chr11q13.1	64051883	chr11	97.38	64037301	-		ENSG00000002330///OTTHUMG00000134302	BCL2-associated agonist of cell death	Human Genome U133 Plus 2.0 Array	February 2009 (Genome Reference Consortium GRCh37)	GO:0001666|GO:0006007|GO:0006915|GO:0006917|GO:0006919|GO:0007173|GO:0008283|GO:0008543|GO:0009725|GO:0009749|GO:0010033|GO:0010508|GO:0010918|GO:0014070|GO:0019221|GO:0032024|GO:0032355|GO:0032570|GO:0033133|GO:0033574|GO:0034201|GO:0035774|GO:0038095|GO:0042493|GO:0042542|GO:0042593|GO:0042981|GO:0043065|GO:0043065|GO:0043200|GO:0043280|GO:0043281|GO:0044342|GO:0045087|GO:0045471|GO:0045579|GO:…	IPR018868 // Pro-apoptotic Bcl-2 protein, BAD // 4.2E-97///IPR018868 // Pro-apoptotic Bcl-2 protein, BAD // 3.0E-28///IPR018868 // Pro-apoptotic Bcl-2 protein, BAD // 5.4E-43///IPR018868 // Pro-apoptotic Bcl-2 protein, BAD // 1.2E-33		603167	Apoptosis // GenMAPP///Apoptosis_KEGG // GenMAPP	NP_004313///NP_116784	NM_004322///NM_032989	U66879	GenBank
200000_s_at	809.711	563.627	672.488	372.786	578.998	389.509	0.17859	-0.10098	0	-0.652948	0.0557456	-0.743594	P	P	P	P	P	P	PRPF8	10594	0000375 // RNA splicing, via transesterification reactions // traceable author statement///0000398 // mRNA splicing, via spliceosome // inferred by curator///0000398 // mRNA splicing, via spliceosome // traceable author statement///0006397 // mRNA processing // traceable author statement///0008380 // RNA splicing // traceable author statement///0010467 // gene expression // traceable author state…	0005634 // nucleus // inferred from electronic annotation///0005654 // nucleoplasm // traceable author statement///0005681 // spliceosomal complex // inferred from electronic annotation///0005682 // U5 snRNP // traceable author statement///0016607 // nuclear speck // inferred from electronic annotation///0030529 // ribonucleoprotein complex // inferred from electronic annotation///0071013 // cata…	0003676 // nucleic acid binding // inferred from electronic annotation///0003723 // RNA binding // inferred from electronic annotation///0005515 // protein binding // inferred from physical interaction///0017070 // U6 snRNA binding // inferred from electronic annotation///0030623 // U5 snRNA binding // inferred from electronic annotation///0046982 // protein heterodimerization activity // inferre…	chr17:1553923-1588100 (-) // 99.2 // p13.3	2013-10-23	This probe set was annotated using the Matching Probes based pipeline to a Entrez Gene identifier using 11 transcripts. // false // Matching Probes // A		AB007510(11),AF092565(11),AK296344(11),BC034545(11),BC064370(11),BX649099(11),ENST00000304992(11),ENST00000571958(10),ENST00000572621(11),ENST00000572723(11),NM_006445(11)	Hs.181368	chr17p13.3	1588100	chr17	99.2	1553923	-		ENSG00000174231///OTTHUMG00000090553	pre-mRNA processing factor 8	Human Genome U133 Plus 2.0 Array	February 2009 (Genome Reference Consortium GRCh37)	GO:0000375|GO:0000398|GO:0000398|GO:0006397|GO:0008380|GO:0010467|GO:0005634|GO:0005654|GO:0005681|GO:0005682|GO:0016607|GO:0030529|GO:0071013|GO:0003676|GO:0003723|GO:0005515|GO:0017070|GO:0030623|GO:0046982	IPR000555 // JAB1/Mov34/MPN/PAD-1 // 2.9E-16///IPR012591 // Pre-mRNA-processing-splicing factor 8 // 2.6E-84///IPR012592 // PROCN // 5.7E-226///IPR012984 // PRO, C-terminal // 1.9E-24///IPR012984 // PRO, C-terminal // 1.4E-54///IPR019580 // Pre-mRNA-processing-splicing factor 8, U6-snRNA-binding // 5.9E-97///IPR019581 // Pre-mRNA-processing-splicing factor 8, U5-snRNA-binding // 3.1E-73///IPR0195…		600059///607300		NP_006436	NM_006445	NM_006445	GenBank
200001_at	2398.65	2450.87	2608.57	2602.7	2782.58	2385.26	-0.210345	0.0638175	0	0.194959	0.364854	-0.084857	P	P	P	P	P	P	CAPNS1	826	0006508 // proteolysis // inferred from electronic annotation///0008284 // positive regulation of cell proliferation // traceable author statement	0005737 // cytoplasm // inferred from electronic annotation///0005886 // plasma membrane // inferred from electronic annotation///0016020 // membrane // inferred from electronic annotation	0004198 // calcium-dependent cysteine-type endopeptidase activity // inferred from electronic annotation///0005509 // calcium ion binding // inferred from electronic annotation///0005515 // protein binding // inferred from physical interaction///0046872 // metal ion binding // inferred from electronic annotation///0046982 // protein heterodimerization activity // inferred from electronic annotati…	chr19:36630916-36641255 (+) // 93.37 // q13.12	2013-10-23	This probe set was annotated using the Matching Probes based pipeline to a Entrez Gene identifier using 18 transcripts. // false // Matching Probes // A	n126800 // noncode // 2 // Cross Hyb Matching Probes///BT009775 // gb // 5 // Cross Hyb Matching Probes///GENSCAN00000004679 // ensembl // 5 // Cross Hyb Matching Probes///ENST00000586851 // ensembl // 7 // Cross Hyb Matching Probes///ENST00000590211 // ensembl // 2 // Cross Hyb Matching Probes///OTTHUMT00000457419 // vega // 7 // Cross Hyb Matching Probes///OTTHUMT00000457420 // vega // 2 // Cro…	AK289606(11),BC000592(11),BC007779(11),BC011903(10),BC017308(11),BC018931(11),BC021933(11),BC023643(11),BC064998(11),ENST00000246533(11),ENST00000587718(10),ENST00000588546(11),ENST00000588780(9),ENST00000588815(11),ENST00000589146(9),ENST00000590874(9),NM_001003962(11),NM_001749(11)	Hs.74451	chr19q13.12	36641255	chr19	93.37	36630916	+	EC:3.4.22.17	ENSG00000126247///OTTHUMG00000160811	calpain, small subunit 1	Human Genome U133 Plus 2.0 Array	February 2009 (Genome Reference Consortium GRCh37)	GO:0006508|GO:0008284|GO:0005737|GO:0005886|GO:0016020|GO:0004198|GO:0005509|GO:0005515|GO:0046872|GO:0046982			114170	Integrin-mediated_cell_adhesion_KEGG // GenMAPP	NP_001003962///NP_001740	NM_001003962///NM_001749	NM_001749	GenBank
200002_at	5936.07	5532.77	6077.5	6502.41	5848.09	6510.46	-0.123277	0.0183091	0	0.295707	0.216183	0.143538	P	P	P	P	P	P	RPL35	11224	0000184 // nuclear-transcribed mRNA catabolic process, nonsense-mediated decay // traceable author statement///0006412 // translation // non-traceable author statement///0006412 // translation // traceable author statement///0006413 // translational initiation // traceable author statement///0006414 // translational elongation // traceable author statement///0006415 // translational termination /…	0005622 // intracellular // inferred from electronic annotation///0005730 // nucleolus // traceable author statement///0005737 // cytoplasm // inferred from direct assay///0005829 // cytosol // traceable author statement///0005840 // ribosome // inferred from electronic annotation///0022625 // cytosolic large ribosomal subunit // inferred from direct assay///0030529 // ribonucleoprotein complex /…	0003729 // mRNA binding // traceable author statement///0003735 // structural constituent of ribosome // non-traceable author statement	chr9:127620162-127624207 (-) // 97.46 // q33.3	2013-10-23	This probe set was annotated using the Matching Probes based pipeline to a Entrez Gene identifier using 13 transcripts. // false // Matching Probes // A	n344871 // noncode // 7 // Cross Hyb Matching Probes///GENSCAN00000001432 // ensembl // 2 // Cross Hyb Matching Probes///GENSCAN00000002456 // ensembl // 3 // Cross Hyb Matching Probes///GENSCAN00000031040 // ensembl // 4 // Cross Hyb Matching Probes///GENSCAN00000045943 // ensembl // 6 // Cross Hyb Matching Probes///ENST00000433398 // ensembl // 3 // Cross Hyb Matching Probes///ENST00000598872 /…	AK291072(11),BC000348(11),BC010919(11),BC071915(11),BC094828(11),CR456877(11),ENST00000348462(11),ENST00000373570(11),ENST00000487431(11),ENST00000493018(11),ENST00000495728(9),NM_007209(11),U12465(11)	Hs.182825	chr9q34.1	127624207	chr9	97.46	127620162	-		ENSG00000136942///OTTHUMG00000020659	ribosomal protein L35	Human Genome U133 Plus 2.0 Array	February 2009 (Genome Reference Consortium GRCh37)	GO:0000184|GO:0006412|GO:0006412|GO:0006413|GO:0006414|GO:0006415|GO:0006614|GO:0010467|GO:0016032|GO:0016070|GO:0016071|GO:0019058|GO:0019083|GO:0044267|GO:0005622|GO:0005730|GO:0005737|GO:0005829|GO:0005840|GO:0022625|GO:0030529|GO:0003729|GO:0003735	IPR001854 // Ribosomal protein L29 // 2.3E-25///IPR001854 // Ribosomal protein L29 // 4.5E-25			Ribosomal_Proteins // GenMAPP	NP_009140	NM_007209	NM_007209	GenBank
200003_s_at	10784.6	9321.95	10555.3	10469.2	8613.15	10503.6	-0.0328236	0	0.0254836	0.211878	0.00381851	0.0626512	P	P	P	P	P	P	RPL28	6158	0000184 // nuclear-transcribed mRNA catabolic process, nonsense-mediated decay // traceable author statement///0006412 // translation // non-traceable author statement///0006412 // translation // traceable author statement///0006413 // translational initiation // traceable author statement///0006414 // translational elongation // traceable author statement///0006415 // translational termination /…	0005622 // intracellular // inferred from electronic annotation///0005737 // cytoplasm // inferred from direct assay///0005829 // cytosol // traceable author statement///0005840 // ribosome // inferred from electronic annotation///0022625 // cytosolic large ribosomal subunit // inferred from direct assay///0030529 // ribonucleoprotein complex // inferred from electronic annotation	0003723 // RNA binding // traceable author statement///0003735 // structural constituent of ribosome // non-traceable author statement///0005515 // protein binding // inferred from physical interaction	chr19:55897314-55899740 (+) // 98.56 // q13.42	2013-10-23	This probe set was annotated using the Matching Probes based pipeline to a Entrez Gene identifier using 24 transcripts. // false // Matching Probes // A	GENSCAN00000026992 // ensembl // 2 // Cross Hyb Matching Probes///GENSCAN00000031996 // ensembl // 3 // Cross Hyb Matching Probes///GENSCAN00000040365 // ensembl // 2 // Cross Hyb Matching Probes///ENST00000558131 // ensembl // 8 // Cross Hyb Matching Probes///ENST00000398900 // ensembl // 2 // Cross Hyb Matching Probes///ENST00000461223 // ensembl // 3 // Cross Hyb Matching Probes///ENST00000464…	AB209627(10),AK096870(11),AK293736(11),BC010173(11),BC010182(11),BC011582(11),CR457024(11),ENST00000344063(11),ENST00000426763(10),ENST00000428193(10),ENST00000431533(10),ENST00000458349(11),ENST00000558752(10),ENST00000558815(11),ENST00000559463(11),ENST00000560055(11),ENST00000560583(11),ENST00000560881(10),NM_000991(11),NM_001136134(11),NM_001136135(11),NM_001136136(10),NM_001136137(10),U14969…	Hs.4437	chr19q13.4	55899740	chr19	98.56	55897314	+	EC:3.6.5.3	ENSG00000108107///OTTHUMG00000171991	ribosomal protein L28	Human Genome U133 Plus 2.0 Array	February 2009 (Genome Reference Consortium GRCh37)	GO:0000184|GO:0006412|GO:0006412|GO:0006413|GO:0006414|GO:0006415|GO:0006614|GO:0010467|GO:0016032|GO:0016070|GO:0016071|GO:0019058|GO:0019083|GO:0044267|GO:0005622|GO:0005737|GO:0005829|GO:0005840|GO:0022625|GO:0030529|GO:0003723|GO:0003735|GO:0005515			603638	Ribosomal_Proteins // GenMAPP	NP_000982///NP_001129606///NP_001129607///NP_001129608///NP_001129609	NM_000991///NM_001136134///NM_001136135///NM_001136136///NM_001136137	NM_000991	GenBank
200004_at	6873.6	4768.56	5064.36	6190.44	5379.67	7157.52	0.284418	0	-0.0669599	0.420912	0.291873	0.476378	P	P	P	P	P	P	EIF4G2	1982	0006412 // translation // inferred from electronic annotation///0006413 // translational initiation // inferred from electronic annotation///0006417 // regulation of translation // inferred from electronic annotation///0006446 // regulation of translational initiation // inferred from direct assay///0007050 // cell cycle arrest // traceable author statement///0008219 // cell death // traceable au…	0005737 // cytoplasm // inferred from electronic annotation///0005829 // cytosol // traceable author statement///0016281 // eukaryotic translation initiation factor 4F complex // inferred from direct assay	0003677 // DNA binding // inferred from electronic annotation///0003723 // RNA binding // inferred from electronic annotation///0003743 // translation initiation factor activity // inferred from direct assay///0005488 // binding // inferred from electronic annotation///0005515 // protein binding // inferred from physical interaction///0008135 // translation factor activity, nucleic acid binding /…	chr11:10818601-10830471 (-) // 97.46 // p15.3	2013-10-23	This probe set was annotated using the Matching Probes based pipeline to a Entrez Gene identifier using 21 transcripts. // false // Matching Probes // A	n145205 // noncode // 2 // Cross Hyb Matching Probes///n391075 // noncode // 2 // Cross Hyb Matching Probes	AB063323(11),AB073654(11),AY513274(11),BC018746(11),BC018975(11),BC039851(11),BC043149(11),BC065276(11),BC111415(11),BC111548(11),BX647799(11),ENST00000339995(11),ENST00000396525(11),ENST00000525681(11),ENST00000526148(11),ENST00000532383(11),NM_001042559(11),NM_001172705(11),NM_001418(11),U73824(11),U76111(10)	Hs.183684	chr11p15	10830471	chr11	97.46	10818601	-		ENSG00000110321///OTTHUMG00000165823	eukaryotic translation initiation factor 4 gamma, 2	Human Genome U133 Plus 2.0 Array	February 2009 (Genome Reference Consortium GRCh37)	GO:0006412|GO:0006413|GO:0006417|GO:0006446|GO:0007050|GO:0008219|GO:0016070|GO:0019221|GO:0005737|GO:0005829|GO:0016281|GO:0003677|GO:0003723|GO:0003743|GO:0005488|GO:0005515|GO:0008135	IPR003307 // W2 domain // 3.3E-23///IPR003307 // W2 domain // 3.1E-23///IPR003890 // MIF4G-like, type 3 // 3.4E-61///IPR003890 // MIF4G-like, type 3 // 3.1E-61///IPR003891 // Initiation factor eIF-4 gamma, MA3 // 4.4E-22///IPR003891 // Initiation factor eIF-4 gamma, MA3 // 4.2E-22		602325	Circadian_Exercise // GenMAPP	NP_001036024///NP_001166176///NP_001409	NM_001042559///NM_001172705///NM_001418	NM_001418	GenBank
200005_at	2225.41	2058.04	1791.14	2490.68	2385.46	2133.79	0	0.130289	-0.223887	0.449986	0.461193	0.0729117	P	P	P	P	P	P	EIF3D	8664	0001731 // formation of translation preinitiation complex // inferred from electronic annotation///0001732 // formation of translation initiation complex // inferred from electronic annotation///0006412 // translation // traceable author statement///0006413 // translational initiation // inferred by curator///0006413 // translational initiation // inferred from direct assay///0006413 // translati…	0005737 // cytoplasm // inferred from electronic annotation///0005829 // cytosol // traceable author statement///0005852 // eukaryotic translation initiation factor 3 complex // inferred from direct assay///0016282 // eukaryotic 43S preinitiation complex // inferred from electronic annotation///0033290 // eukaryotic 48S preinitiation complex // inferred from electronic annotation	0003743 // translation initiation factor activity // inferred by curator///0003743 // translation initiation factor activity // inferred from direct assay///0005515 // protein binding // inferred from physical interaction	chr22:36906902-36925183 (-) // 96.01 // q12.3	2013-10-23	This probe set was annotated using the Matching Probes based pipeline to a Entrez Gene identifier using 20 transcripts. // false // Matching Probes // A	ENST00000478547 // ensembl // 6 // Cross Hyb Matching Probes///OTTHUMT00000319036 // vega // 6 // Cross Hyb Matching Probes	AK300199(11),AK301284(11),AK303884(11),BC000328(11),BC000469(11),BC014912(11),BC080515(11),BC093100(11),BC093686(11),BC101477(11),BT007381(11),CR456489(11),ENST00000216190(11),ENST00000405442(11),ENST00000426531(11),ENST00000458572(9),ENST00000462641(11),ENST00000541106(11),NM_003753(11),U54558(11)	Hs.55682	chr22q13.1	36925183	chr22	96.01	36906902	-		ENSG00000100353///OTTHUMG00000150599	eukaryotic translation initiation factor 3, subunit D	Human Genome U133 Plus 2.0 Array	February 2009 (Genome Reference Consortium GRCh37)	GO:0001731|GO:0001732|GO:0006412|GO:0006413|GO:0006413|GO:0006413|GO:0006446|GO:0010467|GO:0044267|GO:0005737|GO:0005829|GO:0005852|GO:0016282|GO:0033290|GO:0003743|GO:0003743|GO:0005515	IPR007783 // Eukaryotic translation initiation factor 3 subunit D // 2.8E-215///IPR007783 // Eukaryotic translation initiation factor 3 subunit D // 3.0E-90///IPR007783 // Eukaryotic translation initiation factor 3 subunit D // 5.7E-79///IPR007783 // Eukaryotic translation initiation factor 3 subunit D // 2.5E-18///IPR007783 // Eukaryotic translation initiation factor 3 subunit D // 6.8E-184		603915	Translation_Factors // GenMAPP	NP_003744	NM_003753	NM_003753	GenBank
200006_at	4204.11	3612.47	4048.39	4278.41	4098.49	4492.95	-0.0242825	0	0.0105748	0.288511	0.300014	0.205148	P	P	P	P	P	P	PARK7	11315	0001963 // synaptic transmission, dopaminergic // inferred from electronic annotation///0006508 // proteolysis // inferred from electronic annotation///0006914 // autophagy // inferred from electronic annotation///0006950 // response to stress // inferred from electronic annotation///0006954 // inflammatory response // inferred from electronic annotation///0006979 // response to oxidative stress …	0005634 // nucleus // inferred from direct assay///0005737 // cytoplasm // inferred from direct assay///0005739 // mitochondrion // inferred from direct assay///0005829 // cytosol // inferred from electronic annotation///0030424 // axon // inferred from electronic annotation	0003723 // RNA binding // inferred from electronic annotation///0003729 // mRNA binding // inferred from direct assay///0004601 // peroxidase activity // inferred from sequence or structural similarity///0005515 // protein binding // inferred from physical interaction///0008233 // peptidase activity // inferred from direct assay///0016787 // hydrolase activity // inferred from electronic annotati…	chr1:8022839-8045342 (+) // 95.37 // p36.23	2013-10-23	This probe set was annotated using the Matching Probes based pipeline to a Entrez Gene identifier using 14 transcripts. // false // Matching Probes // A	GENSCAN00000012447 // ensembl // 7 // Cross Hyb Matching Probes	AB073864(9),AF021819(11),AK091679(11),BC008188(11),D61380(11),ENST00000338639(11),ENST00000377488(9),ENST00000377491(11),ENST00000377493(11),ENST00000469225(11),ENST00000493373(9),ENST00000493678(11),NM_001123377(11),NM_007262(11)	Hs.10958	chr1p36.23	8045342	chr1	95.37	8022839	+		ENSG00000116288///OTTHUMG00000001210	parkinson protein 7	Human Genome U133 Plus 2.0 Array	February 2009 (Genome Reference Consortium GRCh37)	GO:0001963|GO:0006508|GO:0006914|GO:0006950|GO:0006954|GO:0006979|GO:0007005|GO:0007338|GO:0008219|GO:0008344|GO:0032091|GO:0034599|GO:0042493|GO:0042542|GO:0042743|GO:0043523|GO:0043524|GO:0050727|GO:0050821|GO:0051583|GO:0051899|GO:0060081|GO:0060548|GO:0060765|GO:0070301|GO:2000277|GO:2001237|GO:0005634|GO:0005737|GO:0005739|GO:0005829|GO:0030424|GO:0003723|GO:0003729|GO:0004601|GO:0005515|GO:…	IPR002818 // ThiJ/PfpI // 2.9E-37///IPR002818 // ThiJ/PfpI // 7.9E-26///IPR002818 // ThiJ/PfpI // 1.7E-33		602533///606324		NP_001116849///NP_009193	NM_001123377///NM_007262	NM_007262	GenBank
200007_at	5580.64	4546.59	4616.67	4585.6	4133.08	4724.02	0.0525541	0	-0.131715	0.0567536	-0.0196571	-0.0542979	P	P	P	P	P	P	SRP14	6727	0006412 // translation // traceable author statement///0006613 // cotranslational protein targeting to membrane // traceable author statement///0006614 // SRP-dependent cotranslational protein targeting to membrane // traceable author statement///0010467 // gene expression // traceable author statement///0042493 // response to drug // inferred from direct assay///0044267 // cellular protein metab…	0005737 // cytoplasm // traceable author statement///0005786 // signal recognition particle, endoplasmic reticulum targeting // inferred from direct assay///0005829 // cytosol // traceable author statement///0030529 // ribonucleoprotein complex // inferred from electronic annotation///0048500 // signal recognition particle // inferred from electronic annotation	0003723 // RNA binding // traceable author statement///0008312 // 7S RNA binding // inferred from electronic annotation///0030942 // endoplasmic reticulum signal peptide binding // inferred from electronic annotation	chr15:40328242-40331336 (-) // 87.93 // q15.1	2013-10-23	This probe set was annotated using the Matching Probes based pipeline to a Entrez Gene identifier using 13 transcripts. // false // Matching Probes // A	n342777 // noncode // 6 // Cross Hyb Matching Probes///U92988 // gb // 5 // Cross Hyb Matching Probes///GENSCAN00000001882 // ensembl // 1 // Cross Hyb Matching Probes///GENSCAN00000008301 // ensembl // 6 // Cross Hyb Matching Probes///GENSCAN00000029550 // ensembl // 2 // Cross Hyb Matching Probes///ENST00000559081 // ensembl // 5 // Cross Hyb Matching Probes///ENST00000558243 // ensembl // 5 //…	AB061546(11),BC035495(11),BC051006(11),BC071716(11),BC100031(11),ENST00000267884(11),ENST00000558527(11),ENST00000558720(11),ENST00000559439(10),ENST00000559475(9),ENST00000560773(10),NM_003134(11),U07857(11)	Hs.180394	chr15q22	40331336	chr15	87.93	40328242	-		ENSG00000140319///OTTHUMG00000172391	signal recognition particle 14kDa (homologous Alu RNA binding protein)	Human Genome U133 Plus 2.0 Array	February 2009 (Genome Reference Consortium GRCh37)	GO:0006412|GO:0006613|GO:0006614|GO:0010467|GO:0042493|GO:0044267|GO:0045047|GO:0045900|GO:0005737|GO:0005786|GO:0005829|GO:0030529|GO:0048500|GO:0003723|GO:0008312|GO:0030942	IPR003210 // Signal recognition particle, SRP14 subunit // 1.4E-36		600708		NP_003125	NM_003134	NM_003134	GenBank
200008_s_at	2391.89	2114.73	2065.18	2555.07	2279.57	2597.26	0	0.0654192	-0.122575	0.38273	0.291614	0.252407	P	P	P	P	P	P	GDI2	2665	0007165 // signal transduction // traceable author statement///0007264 // small GTPase mediated signal transduction // traceable author statement///0015031 // protein transport // inferred from electronic annotation///0032851 // positive regulation of Rab GTPase activity // inferred from electronic annotation///0051056 // regulation of small GTPase mediated signal transduction // traceable author…	0005737 // cytoplasm // traceable author statement///0005794 // Golgi apparatus // inferred from electronic annotation///0005829 // cytosol // traceable author statement///0009986 // cell surface // inferred from direct assay///0016020 // membrane // inferred from electronic annotation	0005093 // Rab GDP-dissociation inhibitor activity // inferred from electronic annotation///0005096 // GTPase activator activity // inferred from electronic annotation///0005097 // Rab GTPase activator activity // inferred from electronic annotation///0005515 // protein binding // inferred from physical interaction	chr10:5807948-5855215 (-) // 96.95 // p15.1	2013-10-23	This probe set was annotated using the Matching Probes based pipeline to a Entrez Gene identifier using 16 transcripts. // false // Matching Probes // A	GENSCAN00000009624 // ensembl // 2 // Cross Hyb Matching Probes///GENSCAN00000028799 // ensembl // 7 // Cross Hyb Matching Probes///ENST00000429312 // ensembl // 2 // Cross Hyb Matching Probes///ENST00000445131 // ensembl // 7 // Cross Hyb Matching Probes///OTTHUMT00000026185 // vega // 7 // Cross Hyb Matching Probes///OTTHUMT00000341971 // vega // 2 // Cross Hyb Matching Probes	AB451295(11),AK094671(11),AK122841(10),AK297177(11),AK297554(11),BC005145(11),BT006868(11),CR457073(11),D13988(11),ENST00000380132(11),ENST00000380181(11),ENST00000380191(11),ENST00000447751(10),ENST00000479928(11),NM_001115156(11),NM_001494(11)	Hs.56845	chr10p15	5855215	chr10	96.95	5807948	-		ENSG00000057608///OTTHUMG00000017607	GDP dissociation inhibitor 2	Human Genome U133 Plus 2.0 Array	February 2009 (Genome Reference Consortium GRCh37)	GO:0007165|GO:0007264|GO:0015031|GO:0032851|GO:0051056|GO:0005737|GO:0005794|GO:0005829|GO:0009986|GO:0016020|GO:0005093|GO:0005096|GO:0005097|GO:0005515	IPR018203 // GDP dissociation inhibitor // 3.3E-228///IPR018203 // GDP dissociation inhibitor // 4.0E-89///IPR018203 // GDP dissociation inhibitor // 1.2E-44///IPR018203 // GDP dissociation inhibitor // 9.4E-157///IPR018203 // GDP dissociation inhibitor // 8.1E-218		600767		NP_001108628///NP_001485	NM_001115156///NM_001494	D13988	GenBank
200009_at	4099.13	3826.17	3722.67	4251.93	4140.31	4392.26	0	0.143676	-0.0496707	0.340318	0.375422	0.233209	P	P	P	P	P	P	GDI2	2665	0007165 // signal transduction // traceable author statement///0007264 // small GTPase mediated signal transduction // traceable author statement///0015031 // protein transport // inferred from electronic annotation///0032851 // positive regulation of Rab GTPase activity // inferred from electronic annotation///0051056 // regulation of small GTPase mediated signal transduction // traceable author…	0005737 // cytoplasm // traceable author statement///0005794 // Golgi apparatus // inferred from electronic annotation///0005829 // cytosol // traceable author statement///0009986 // cell surface // inferred from direct assay///0016020 // membrane // inferred from electronic annotation	0005093 // Rab GDP-dissociation inhibitor activity // inferred from electronic annotation///0005096 // GTPase activator activity // inferred from electronic annotation///0005097 // Rab GTPase activator activity // inferred from electronic annotation///0005515 // protein binding // inferred from physical interaction	chr10:5807185-5855373 (-) // 99.34 // p15.1	2013-10-23	This probe set was annotated using the Matching Probes based pipeline to a Entrez Gene identifier using 7 transcripts. // false // Matching Probes // A	AK297554 // gb // 2 // Cross Hyb Matching Probes	AK094671(11),AK122841(10),BC005145(11),ENST00000380191(11),ENST00000479928(11),NM_001115156(11),NM_001494(11)	Hs.56845	chr10p15	5855373	chr10	99.34	5807185	-		ENSG00000057608///OTTHUMG00000017607	GDP dissociation inhibitor 2	Human Genome U133 Plus 2.0 Array	February 2009 (Genome Reference Consortium GRCh37)	GO:0007165|GO:0007264|GO:0015031|GO:0032851|GO:0051056|GO:0005737|GO:0005794|GO:0005829|GO:0009986|GO:0016020|GO:0005093|GO:0005096|GO:0005097|GO:0005515	IPR018203 // GDP dissociation inhibitor // 3.3E-228		600767		NP_001108628///NP_001485	NM_001115156///NM_001494	NM_001494	GenBank
200010_at	6886.02	6287.71	6671.69	7556.89	6485.16	6879.65	-0.0436902	0.0682673	0	0.37795	0.230784	0.0885391	P	P	P	P	P	P	RPL11	6135	0000184 // nuclear-transcribed mRNA catabolic process, nonsense-mediated decay // traceable author statement///0006364 // rRNA processing // inferred from mutant phenotype///0006412 // translation // non-traceable author statement///0006412 // translation // traceable author statement///0006413 // translational initiation // traceable author statement///0006414 // translational elongation // trac…	0005622 // intracellular // inferred from electronic annotation///0005634 // nucleus // inferred from electronic annotation///0005730 // nucleolus // inferred from direct assay///0005829 // cytosol // traceable author statement///0005840 // ribosome // inferred from electronic annotation///0022625 // cytosolic large ribosomal subunit // inferred from direct assay///0030529 // ribonucleoprotein co…	0003723 // RNA binding // traceable author statement///0003735 // structural constituent of ribosome // non-traceable author statement///0005515 // protein binding // inferred from physical interaction///0019843 // rRNA binding // inferred from electronic annotation	chr1:24019097-24022913 (+) // 97.29 // p36.11	2013-10-23	This probe set was annotated using the Matching Probes based pipeline to a Entrez Gene identifier using 8 transcripts. // false // Matching Probes // A	AY871274 // gb // 8 // Cross Hyb Matching Probes///GENSCAN00000045998 // ensembl // 2 // Cross Hyb Matching Probes///ENST00000467075 // ensembl // 8 // Cross Hyb Matching Probes///ENST00000498453 // ensembl // 2 // Cross Hyb Matching Probes///OTTHUMT00000008169 // vega // 8 // Cross Hyb Matching Probes///OTTHUMT00000349767 // vega // 2 // Cross Hyb Matching Probes	BC018970(9),ENST00000374550(9),ENST00000443624(11),ENST00000458455(11),ENST00000482370(9),L05092(9),NM_000975(9),NM_001199802(9)	Hs.179943	chr1p36.1-p35	24022913	chr1	97.29	24019097	+		ENSG00000142676///OTTHUMG00000002926	ribosomal protein L11	Human Genome U133 Plus 2.0 Array	February 2009 (Genome Reference Consortium GRCh37)	GO:0000184|GO:0006364|GO:0006412|GO:0006412|GO:0006413|GO:0006414|GO:0006415|GO:0006605|GO:0006614|GO:0010467|GO:0016032|GO:0016070|GO:0016071|GO:0019058|GO:0019083|GO:0034504|GO:0042273|GO:0044267|GO:0005622|GO:0005634|GO:0005730|GO:0005829|GO:0005840|GO:0022625|GO:0030529|GO:0003723|GO:0003735|GO:0005515|GO:0019843	IPR002132 // Ribosomal protein L5 // 8.0E-27///IPR002132 // Ribosomal protein L5 // 3.4E-23///IPR002132 // Ribosomal protein L5 // 7.1E-25///IPR002132 // Ribosomal protein L5 // 1.8E-23///IPR002132 // Ribosomal protein L5 // 7.5E-27///IPR002132 // Ribosomal protein L5 // 3.3E-23		604175///612562	Ribosomal_Proteins // GenMAPP///Ribosomal_Proteins // GenMAPP	NP_000966///NP_001186731	NM_000975///NM_001199802	NM_000975	GenBank
200011_s_at	1328.51	917.958	1097.48	1110.96	992.876	1242.71	0.186305	-0.103915	0	0.215816	0.12718	0.223542	P	P	P	P	P	P	ARF3	377	0006184 // GTP catabolic process // traceable author statement///0006644 // phospholipid metabolic process // traceable author statement///0006661 // phosphatidylinositol biosynthetic process // traceable author statement///0006810 // transport // inferred from electronic annotation///0006886 // intracellular protein transport // inferred from electronic annotation///0007186 // G-protein coupled …	0000139 // Golgi membrane // traceable author statement///0005622 // intracellular // inferred from electronic annotation///0005634 // nucleus // inferred from electronic annotation///0005737 // cytoplasm // inferred from electronic annotation///0005794 // Golgi apparatus // inferred from electronic annotation///0048471 // perinuclear region of cytoplasm // inferred from electronic annotation	0000166 // nucleotide binding // inferred from electronic annotation///0003924 // GTPase activity // traceable author statement///0004871 // signal transducer activity // inferred from electronic annotation///0005525 // GTP binding // inferred from electronic annotation///0019001 // guanyl nucleotide binding // inferred from electronic annotation///0031683 // G-protein beta/gamma-subunit complex …	chr12:49329991-49351310 (-) // 98.47 // q13.12	2013-10-23	This probe set was annotated using the Matching Probes based pipeline to a Entrez Gene identifier using 6 transcripts. // false // Matching Probes // A		BC007647(11),BC017565(11),BC028402(11),ENST00000256682(11),M74491(11),NM_001659(11)	Hs.119177	chr12q13	49351310	chr12	98.47	49329991	-		ENSG00000134287///OTTHUMG00000168080	ADP-ribosylation factor 3	Human Genome U133 Plus 2.0 Array	February 2009 (Genome Reference Consortium GRCh37)	GO:0006184|GO:0006644|GO:0006661|GO:0006810|GO:0006886|GO:0007186|GO:0007264|GO:0015031|GO:0016192|GO:0044281|GO:0000139|GO:0005622|GO:0005634|GO:0005737|GO:0005794|GO:0048471|GO:0000166|GO:0003924|GO:0004871|GO:0005525|GO:0019001|GO:0031683	IPR001019 // Guanine nucleotide binding protein (G-protein), alpha subunit // 6.0E-12///IPR001806 // Small GTPase superfamily // 1.2E-16///IPR006689 // Small GTPase superfamily, ARF/SAR type // 2.6E-82///IPR006762 // Gtr1/RagA G protein // 7.4E-15///IPR013684 // Mitochondrial Rho-like // 1.5E-12///IPR019009 // Signal recognition particle receptor, beta subunit // 2.6E-18		103190		NP_001650	NM_001659	NM_001659	GenBank
200012_x_at	6368.39	6176.33	6098.68	7022.17	6070.23	6598.32	-0.026875	0.17204	0	0.40163	0.264949	0.157859	P	P	P	P	P	P	RPL21///RPL21P28///SNORA27///SNORD102	6144///26771///619499///100131205	0000184 // nuclear-transcribed mRNA catabolic process, nonsense-mediated decay // traceable author statement///0006412 // translation // non-traceable author statement///0006412 // translation // traceable author statement///0006413 // translational initiation // traceable author statement///0006414 // translational elongation // traceable author statement///0006415 // translational termination /…	0005622 // intracellular // inferred from electronic annotation///0005829 // cytosol // traceable author statement///0005840 // ribosome // inferred from electronic annotation///0022625 // cytosolic large ribosomal subunit // inferred from direct assay///0030529 // ribonucleoprotein complex // inferred from electronic annotation	0003723 // RNA binding // traceable author statement///0003735 // structural constituent of ribosome // non-traceable author statement	chr11:9681951-9682503 (+) // 95.37 // p15.4///chr12:77054151-77054708 (+) // 93.06 // q21.2///chr13:27827898-27830700 (+) // 93.95 // q12.2///chr17:3568480-3569034 (+) // 94.66 // p13.2///chr7:20042354-20042909 (+) // 97.15 // p21.1///chr1:212224827-212225381 (-) // 88.61 // q32.3///chr10:122114174-122114728 (-) // 97.33 // q26.12///chr10:29187891-29188446 (-) // 95.2 // p12.1///chr14:90832996-90…	2013-10-23	This probe set was annotated using the Matching Probes based pipeline to a Entrez Gene identifier using 41 transcripts. // true // Matching Probes // A	uc011bzv.2 // ucsc_genes // 3 // Cross Hyb Matching Probes///n335159 // noncode // 8 // Cross Hyb Matching Probes///n387316 // noncode // 3 // Cross Hyb Matching Probes///AY320407 // gb // 8 // Cross Hyb Matching Probes///AB209100 // gb // 8 // Cross Hyb Matching Probes///D28406 // gb // 2 // Cross Hyb Matching Probes///L25348 // gb // 2 // Cross Hyb Matching Probes///NR_027153 // refseq // 3 // …	uc001uqz.1(9),uc001ura.3(11),n335530(9),n407455(11),NR_026911(10),AF086172(11),BC001603(11),BC007505(11),BC062981(11),BC070184(11),BC070323(11),BC070330(11),BC071902(11),BC104667(11),BX647669(11),CR457032(11),U14967(10),U25789(11),NM_000982(11),GENSCAN00000004089(11),GENSCAN00000011699(11),GENSCAN00000014150(11),GENSCAN00000020588(11),GENSCAN00000025058(11),GENSCAN00000031766(11),GENSCAN000000354…	Hs.184108	chr13q12.2///chr1q32.3	9682503	chr11	95.37	9681951	+	EC:3.6.5.3	ENSG00000122026///ENSG00000213860///ENSG00000220749///ENSG00000220793///ENSG00000220842///ENSG00000229605///ENSG00000239470///ENSG00000244021///OTTHUMG00000016630///OTTHUMG00000017879///OTTHUMG00000019165///OTTHUMG00000037130///OTTHUMG00000152536///OTTHUMG00000157551///OTTHUMG00000158086///OTTHUMG00000158305	ribosomal protein L21///ribosomal protein L21 pseudogene 28///small nucleolar RNA, H/ACA box 27///small nucleolar RNA, C/D box 102	Human Genome U133 Plus 2.0 Array	February 2009 (Genome Reference Consortium GRCh37)	GO:0000184|GO:0006412|GO:0006412|GO:0006413|GO:0006414|GO:0006415|GO:0006614|GO:0010467|GO:0016032|GO:0016070|GO:0016071|GO:0019058|GO:0019083|GO:0044267|GO:0005622|GO:0005829|GO:0005840|GO:0022625|GO:0030529|GO:0003723|GO:0003735	IPR001147 // Ribosomal protein L21e // 4.4E-51///IPR001147 // Ribosomal protein L21e // 1.2E-42///IPR001147 // Ribosomal protein L21e // 1.9E-51///IPR001147 // Ribosomal protein L21e // 2.1E-10		603636	Ribosomal_Proteins // GenMAPP	NP_000973	NM_000982///NR_002574///NR_002575///NR_026911	NM_000982	GenBank
200013_at	9254.09	9340.61	9244.66	10569.7	9361.89	9414.33	-0.0878358	0.168683	0	0.39146	0.289876	0.0704975	P	P	P	P	P	P	RPL24	6152	0000184 // nuclear-transcribed mRNA catabolic process, nonsense-mediated decay // traceable author statement///0006412 // translation // non-traceable author statement///0006412 // translation // traceable author statement///0006413 // translational initiation // traceable author statement///0006414 // translational elongation // traceable author statement///0006415 // translational termination /…	0005829 // cytosol // traceable author statement///0005840 // ribosome // inferred from electronic annotation///0022625 // cytosolic large ribosomal subunit // inferred from direct assay///0030529 // ribonucleoprotein complex // inferred from electronic annotation	0003723 // RNA binding // traceable author statement///0003735 // structural constituent of ribosome // non-traceable author statement	chr9:72832075-72832622 (+) // 95.14 // q21.12///chr3:101399935-101405559 (-) // 99.82 // q12.3	2013-10-23	This probe set was annotated using the Matching Probes based pipeline to a Entrez Gene identifier using 10 transcripts. // false // Matching Probes // A	TCONS_l2_00019084-XLOC_l2_010061 // broad-tucp // 2 // Cross Hyb Matching Probes///AK122630 // gb // 4 // Cross Hyb Matching Probes///BX538309 // gb // 7 // Cross Hyb Matching Probes///D28400 // gb // 2 // Cross Hyb Matching Probes///GENSCAN00000031100 // ensembl // 4 // Cross Hyb Matching Probes///ENST00000470961 // ensembl // 7 // Cross Hyb Matching Probes///ENST00000454858 // ensembl // 2 // C…	BC000690(11),BC070193(11),CR456729(10),ENST00000394077(11),ENST00000464595(11),ENST00000469605(11),ENST00000488288(10),ENST00000495401(11),M94314(11),NM_000986(11)	Hs.184582	chr3q12	72832622	chr9	95.14	72832075	+		ENSG00000114391///ENSG00000181524///OTTHUMG00000014711///OTTHUMG00000159146	ribosomal protein L24	Human Genome U133 Plus 2.0 Array	February 2009 (Genome Reference Consortium GRCh37)	GO:0000184|GO:0006412|GO:0006412|GO:0006413|GO:0006414|GO:0006415|GO:0006614|GO:0010467|GO:0016032|GO:0016070|GO:0016071|GO:0019058|GO:0019083|GO:0044267|GO:0005829|GO:0005840|GO:0022625|GO:0030529|GO:0003723|GO:0003735	IPR000988 // Ribosomal protein L24e-related // 1.4E-40///IPR000988 // Ribosomal protein L24e-related // 6.9E-41///IPR000988 // Ribosomal protein L24e-related // 1.2E-40		604180	Ribosomal_Proteins // GenMAPP	NP_000977	NM_000986	NM_000986	GenBank
200014_s_at	1950.51	1680.6	1836.87	2136.83	1885.5	2149	-0.00271273	0.0255141	0	0.416432	0.309387	0.270668	P	P	P	P	P	P	HNRNPC	3183	0000398 // mRNA splicing, via spliceosome // inferred by curator///0000398 // mRNA splicing, via spliceosome // traceable author statement///0006397 // mRNA processing // inferred from electronic annotation///0008380 // RNA splicing // traceable author statement///0010467 // gene expression // traceable author statement///0038032 // termination of G-protein coupled receptor signaling pathway // i…	0005634 // nucleus // inferred from electronic annotation///0005654 // nucleoplasm // traceable author statement///0005681 // spliceosomal complex // inferred from direct assay///0019013 // viral nucleocapsid // inferred from electronic annotation///0030529 // ribonucleoprotein complex // inferred from electronic annotation///0045120 // pronucleus // inferred from electronic annotation///0071013 …	0000166 // nucleotide binding // inferred from electronic annotation///0003676 // nucleic acid binding // inferred from electronic annotation///0003723 // RNA binding // non-traceable author statement///0003729 // mRNA binding // inferred from electronic annotation///0005515 // protein binding // inferred from physical interaction///0042802 // identical protein binding // inferred from physical i…	chr14:21678714-21737507 (-) // 98.86 // q11.2	2013-10-23	This probe set was annotated using the Matching Probes based pipeline to a Entrez Gene identifier using 23 transcripts. // false // Matching Probes // A		AK126950(11),AK302213(11),BC003394(11),BC066932(11),BC092433(11),BC103758(11),BX247961(11),BX247992(11),ENST00000320084(11),ENST00000336053(11),ENST00000430246(11),ENST00000449098(11),ENST00000553753(11),ENST00000554455(11),ENST00000554969(11),ENST00000555309(11),ENST00000555914(11),ENST00000556142(11),M16342(11),NM_001077442(11),NM_001077443(11),NM_004500(11),NM_031314(11)	Hs.182447	chr14q11.2	21737507	chr14	98.86	21678714	-		ENSG00000092199///OTTHUMG00000170757	heterogeneous nuclear ribonucleoprotein C (C1/C2)	Human Genome U133 Plus 2.0 Array	February 2009 (Genome Reference Consortium GRCh37)	GO:0000398|GO:0000398|GO:0006397|GO:0008380|GO:0010467|GO:0038032|GO:0005634|GO:0005654|GO:0005681|GO:0019013|GO:0030529|GO:0045120|GO:0071013|GO:0000166|GO:0003676|GO:0003723|GO:0003729|GO:0005515|GO:0042802	IPR000504 // RNA recognition motif domain // 5.7E-17///IPR000504 // RNA recognition motif domain // 5.9E-17///IPR000504 // RNA recognition motif domain // 3.9E-17///IPR000504 // RNA recognition motif domain // 6.3E-17		164020	mRNA_processing_Reactome // GenMAPP	NP_001070910///NP_001070911///NP_004491///NP_112604	NM_001077442///NM_001077443///NM_004500///NM_031314	NM_004500	GenBank
200015_s_at	4469.71	4214.57	4500.09	4567.17	4455.05	4917.69	-0.0990825	0.059216	0	0.219557	0.257182	0.172285	P	P	P	P	P	P	SEPT2	4735	0002036 // regulation of L-glutamate transport // inferred from electronic annotation///0007049 // cell cycle // inferred from electronic annotation///0007067 // mitosis // inferred from electronic annotation///0007224 // smoothened signaling pathway // inferred from sequence or structural similarity///0031175 // neuron projection development // inferred from electronic annotation///0032880 // re…	0000145 // exocyst // inferred from electronic annotation///0000775 // chromosome, centromeric region // inferred from electronic annotation///0000776 // kinetochore // inferred from electronic annotation///0000777 // condensed chromosome kinetochore // inferred from electronic annotation///0005634 // nucleus // inferred from direct assay///0005694 // chromosome // inferred from electronic annota…	0000166 // nucleotide binding // inferred from electronic annotation///0005515 // protein binding // inferred from physical interaction///0005525 // GTP binding // inferred from electronic annotation///0030234 // enzyme regulator activity // inferred from electronic annotation///0032947 // protein complex scaffold // inferred from electronic annotation	chr2:242254784-242293439 (+) // 99.91 // q37.3	2013-10-23	This probe set was annotated using the Matching Probes based pipeline to a Entrez Gene identifier using 11 transcripts. // false // Matching Probes // A		AF038404(11),D28540(11),ENST00000360051(11),ENST00000391971(11),ENST00000391973(11),ENST00000402092(11),ENST00000407971(11),NM_001008491(11),NM_001008492(11),NM_004404(11),NM_006155(11)	Hs.155595	chr2q37	242293439	chr2	99.91	242254784	+		ENSG00000168385///OTTHUMG00000133394	septin 2	Human Genome U133 Plus 2.0 Array	February 2009 (Genome Reference Consortium GRCh37)	GO:0002036|GO:0007049|GO:0007067|GO:0007224|GO:0031175|GO:0032880|GO:0042384|GO:0050790|GO:0051301|GO:0000145|GO:0000775|GO:0000776|GO:0000777|GO:0005634|GO:0005694|GO:0005730|GO:0005737|GO:0005819|GO:0005856|GO:0005886|GO:0005938|GO:0009986|GO:0015629|GO:0016020|GO:0030496|GO:0031105|GO:0032154|GO:0042995|GO:0045202|GO:0048471|GO:0060170|GO:0000166|GO:0005515|GO:0005525|GO:0030234|GO:0032947	IPR000038 // Cell division protein GTP binding // 1.1E-131///IPR000038 // Cell division protein GTP binding // 7.6E-128		601506		NP_001008491///NP_001008492///NP_004395///NP_006146	NM_001008491///NM_001008492///NM_004404///NM_006155	NM_004404	GenBank
200016_x_at	5753.17	4904.38	5673.77	6522.85	6399.75	6881.61	-0.0128069	0	0.0564504	0.455857	0.501853	0.379147	P	P	P	P	P	P	HNRNPA1	3178	0000380 // alternative mRNA splicing, via spliceosome // inferred from electronic annotation///0000398 // mRNA splicing, via spliceosome // inferred by curator///0000398 // mRNA splicing, via spliceosome // traceable author statement///0006397 // mRNA processing // traceable author statement///0006405 // RNA export from nucleus // inferred by curator///0006810 // transport // inferred from electr…	0005634 // nucleus // inferred from direct assay///0005654 // nucleoplasm // inferred from direct assay///0005654 // nucleoplasm // traceable author statement///0005681 // spliceosomal complex // inferred from direct assay///0005730 // nucleolus // inferred from direct assay///0005737 // cytoplasm // inferred from direct assay///0019013 // viral nucleocapsid // inferred from electronic annotation…	0000166 // nucleotide binding // inferred from electronic annotation///0003676 // nucleic acid binding // inferred from electronic annotation///0003697 // single-stranded DNA binding // inferred from direct assay///0003723 // RNA binding // traceable author statement///0003727 // single-stranded RNA binding // inferred by curator///0005515 // protein binding // inferred from physical interaction	chr12:54674487-54679030 (+) // 95.7 // q13.13///chr2:201927748-201929483 (+) // 86.72 // q33.1///chr18:29991468-29993200 (-) // 87.22 // q12.1///chr5:79654187-79655918 (-) // 85.59 // q14.1	2013-10-23	This probe set was annotated using the Matching Probes based pipeline to a Entrez Gene identifier using 13 transcripts. // false // Matching Probes // A	TCONS_l2_00009739-XLOC_l2_005225 // broad-tucp // 3 // Cross Hyb Matching Probes///TCONS_00007807-XLOC_004032 // broad-lincrna // 2 // Cross Hyb Matching Probes///uc009znj.1 // ucsc_genes // 3 // Cross Hyb Matching Probes///uc001vgx.1 // ucsc_genes // 3 // Cross Hyb Matching Probes///uc001vgy.1 // ucsc_genes // 3 // Cross Hyb Matching Probes///uc001vgz.1 // ucsc_genes // 3 // Cross Hyb Matching P…	BC002355(11),BC009600(11),BC012158(11),BC033714(11),BC052296(11),BC074502(11),BC103707(11),ENST00000330752(11),ENST00000340913(11),ENST00000546500(11),ENST00000547276(11),NM_002136(11),NM_031157(11)	Hs.249495	chr12q13.1	54679030	chr12	95.7	54674487	+		ENSG00000135486///ENSG00000215492///OTTHUMG00000169702	heterogeneous nuclear ribonucleoprotein A1	Human Genome U133 Plus 2.0 Array	February 2009 (Genome Reference Consortium GRCh37)	GO:0000380|GO:0000398|GO:0000398|GO:0006397|GO:0006405|GO:0006810|GO:0008380|GO:0010467|GO:0019048|GO:0051028|GO:0051168|GO:0051170|GO:0005634|GO:0005654|GO:0005654|GO:0005681|GO:0005730|GO:0005737|GO:0019013|GO:0030529|GO:0045111|GO:0071013|GO:0000166|GO:0003676|GO:0003697|GO:0003723|GO:0003727|GO:0005515	IPR000504 // RNA recognition motif domain // 9.2E-23///IPR000504 // RNA recognition motif domain // 1.1E-23///IPR000504 // RNA recognition motif domain // 5.9E-23///IPR000504 // RNA recognition motif domain // 7.0E-24///IPR000504 // RNA recognition motif domain // 6.7E-23///IPR000504 // RNA recognition motif domain // 7.9E-24///IPR021662 // Nuclear factor hnRNPA1 // 9.9E-19///IPR021662 // Nuclear…		164017		NP_002127///NP_112420	NM_002136///NM_031157	NM_002136	GenBank
200017_at	8488.31	7436.32	8126.91	9546.53	7305.89	9199	-0.0265374	0.0256667	0	0.43048	0.118046	0.223026	P	P	P	P	P	P	RPS27A	6233	0000075 // cell cycle checkpoint // traceable author statement///0000080 // G1 phase of mitotic cell cycle // traceable author statement///0000082 // G1/S transition of mitotic cell cycle // traceable author statement///0000084 // S phase of mitotic cell cycle // traceable author statement///0000122 // negative regulation of transcription from RNA polymerase II promoter // traceable author statem…	0005622 // intracellular // inferred from electronic annotation///0005634 // nucleus // inferred from electronic annotation///0005654 // nucleoplasm // traceable author statement///0005737 // cytoplasm // inferred from electronic annotation///0005829 // cytosol // traceable author statement///0005840 // ribosome // inferred from electronic annotation///0005886 // plasma membrane // traceable auth…	0003735 // structural constituent of ribosome // inferred from direct assay///0005515 // protein binding // inferred from electronic annotation///0046872 // metal ion binding // inferred from electronic annotation	chr1:192685274-192685813 (+) // 93.89 // q31.2///chr2:55459823-55462744 (+) // 99.63 // p16.1///chr16:61089318-61089842 (-) // 95.37 // q21	2013-10-23	This probe set was annotated using the Matching Probes based pipeline to a Entrez Gene identifier using 16 transcripts. // false // Matching Probes // A	TCONS_l2_00000739-XLOC_l2_000553 // broad-tucp // 5 // Cross Hyb Matching Probes///TCONS_l2_00001532-XLOC_l2_001118 // broad-tucp // 1 // Cross Hyb Matching Probes///n411185 // noncode // 4 // Cross Hyb Matching Probes///AK129972 // gb // 7 // Cross Hyb Matching Probes///NR_039624 // refseq // 4 // Cross Hyb Matching Probes///GENSCAN00000000381 // ensembl // 2 // Cross Hyb Matching Probes///GENSC…	AK093614(9),AK225718(11),AY952889(10),BC001392(11),BC042362(11),BC053371(11),BC066293(11),ENST00000272317(11),ENST00000402285(11),ENST00000404735(11),ENST00000449323(9),ENST00000478196(9),ENST00000495843(11),NM_001135592(11),NM_001177413(11),NM_002954(11)	Hs.3297	chr2p16	192685813	chr1	93.89	192685274	+		ENSG00000143947///ENSG00000224631///OTTHUMG00000151919///OTTHUMG00000158168	ribosomal protein S27a	Human Genome U133 Plus 2.0 Array	February 2009 (Genome Reference Consortium GRCh37)	GO:0000075|GO:0000080|GO:0000082|GO:0000084|GO:0000122|GO:0000184|GO:0000187|GO:0000209|GO:0000278|GO:0002224|GO:0002474|GO:0002479|GO:0002755|GO:0002756|GO:0006281|GO:0006351|GO:0006367|GO:0006412|GO:0006412|GO:0006413|GO:0006414|GO:0006415|GO:0006614|GO:0006915|GO:0006977|GO:0007141|GO:0007144|GO:0007173|GO:0007179|GO:0007219|GO:0007220|GO:0007249|GO:0007254|GO:0008063|GO:0008543|GO:0008584|GO:…	IPR000626 // Ubiquitin // 1.1E-38///IPR000626 // Ubiquitin // 2.5E-39///IPR002906 // Ribosomal protein S27a // 7.5E-32///IPR022617 // Small ubiquitin-related modifier, SUMO // 7.7E-24///IPR022617 // Small ubiquitin-related modifier, SUMO // 1.8E-24		191343		NP_001129064///NP_001170884///NP_002945	NM_001135592///NM_001177413///NM_002954	NM_002954	GenBank
200018_at	9597.2	8206.1	8682.16	10753.7	8330.84	10173.9	0	0.0171785	-0.0552506	0.451661	0.156852	0.217751	P	P	P	P	P	P	LOC100508408///RPS13///SNORD14B	6207///85388///100508408	0000184 // nuclear-transcribed mRNA catabolic process, nonsense-mediated decay // traceable author statement///0006412 // translation // inferred by curator///0006412 // translation // traceable author statement///0006413 // translational initiation // traceable author statement///0006414 // translational elongation // traceable author statement///0006415 // translational termination // traceable…	0005622 // intracellular // inferred from electronic annotation///0005634 // nucleus // inferred from direct assay///0005730 // nucleolus // inferred from direct assay///0005829 // cytosol // traceable author statement///0005840 // ribosome // non-traceable author statement///0022627 // cytosolic small ribosomal subunit // inferred from direct assay///0030529 // ribonucleoprotein complex // infer…	0003729 // mRNA binding // inferred from direct assay///0003735 // structural constituent of ribosome // inferred from electronic annotation///0005515 // protein binding // inferred from physical interaction	chr1:53237826-53238346 (-) // 95.85 // p32.3///chr11:17095940-17099220 (-) // 99.43 // p15.1	2013-10-23	This probe set was annotated using the Matching Probes based pipeline to a Entrez Gene identifier using 25 transcripts. // true // Matching Probes // A	n333732 // noncode // 8 // Cross Hyb Matching Probes///D00099 // gb // 2 // Cross Hyb Matching Probes///GENSCAN00000014086 // ensembl // 6 // Cross Hyb Matching Probes///ENST00000533969 // ensembl // 6 // Cross Hyb Matching Probes///ENST00000527571 // ensembl // 4 // Cross Hyb Matching Probes///ENST00000534329 // ensembl // 4 // Cross Hyb Matching Probes///ENST00000528074 // ensembl // 4 // Cross…	uc001mmp.3(11),BC011791(11),BC000475(11),BC006772(11),BC029732(11),BC066322(11),BC100032(11),L01124(11),NM_001017(11),ENST00000531008(9),ENST00000531908(9),ENST00000228140(10),ENST00000526895(11),ENST00000525634(11),ENST00000525828(11),OTTHUMT00000387365(9),OTTHUMT00000387366(9),OTTHUMT00000387367(10),OTTHUMT00000387321(11),OTTHUMT00000387320(11),OTTHUMT00000387351(11)	Hs.165590	chr11p15	53238346	chr1	95.85	53237826	-	EC:3.6.5.3	ENSG00000110700///OTTHUMG00000165988	uncharacterized LOC100508408///ribosomal protein S13///small nucleolar RNA, C/D box 14B	Human Genome U133 Plus 2.0 Array	February 2009 (Genome Reference Consortium GRCh37)	GO:0000184|GO:0006412|GO:0006412|GO:0006413|GO:0006414|GO:0006415|GO:0006614|GO:0010467|GO:0016032|GO:0016070|GO:0016071|GO:0019058|GO:0019083|GO:0033119|GO:0044267|GO:0005622|GO:0005634|GO:0005730|GO:0005829|GO:0005840|GO:0022627|GO:0030529|GO:0003729|GO:0003735|GO:0005515	IPR000589 // Ribosomal protein S15 // 3.4E-12///IPR000589 // Ribosomal protein S15 // 1.7E-27///IPR012606 // Ribosomal protein S13/S15, N-terminal // 2.9E-33///IPR012606 // Ribosomal protein S13/S15, N-terminal // 3.0E-33		180476	Ribosomal_Proteins // GenMAPP///Ribosomal_Proteins // GenMAPP	NP_001008	NM_001017///NR_001452///XR_111163	NM_001017	GenBank
200019_s_at	5911.6	6424.91	6096.33	6307.54	6398.18	5810.36	-0.133701	0.229521	0	0.247348	0.341416	-0.0250559	P	P	P	P	P	P	FAU	2197	0000184 // nuclear-transcribed mRNA catabolic process, nonsense-mediated decay // traceable author statement///0006412 // translation // inferred by curator///0006412 // translation // traceable author statement///0006413 // translational initiation // traceable author statement///0006414 // translational elongation // traceable author statement///0006415 // translational termination // traceable…	0005622 // intracellular // inferred from electronic annotation///0005829 // cytosol // traceable author statement///0005840 // ribosome // inferred from electronic annotation///0015935 // small ribosomal subunit // inferred from direct assay///0022627 // cytosolic small ribosomal subunit // inferred from direct assay///0030529 // ribonucleoprotein complex // inferred from electronic annotation	0003723 // RNA binding // traceable author statement///0003735 // structural constituent of ribosome // inferred from direct assay///0005515 // protein binding // inferred from electronic annotation	chr11:64888102-64889609 (-) // 97.88 // q13.1	2013-10-23	This probe set was annotated using the Matching Probes based pipeline to a Entrez Gene identifier using 13 transcripts. // false // Matching Probes // A	X75315 // gb // 4 // Cross Hyb Matching Probes	BC033877(11),BC051834(11),CR541974(11),ENST00000279259(11),ENST00000434372(10),ENST00000525297(11),ENST00000526555(11),ENST00000527548(11),ENST00000529259(11),ENST00000529639(11),ENST00000531357(11),ENST00000531743(11),NM_001997(11)	Hs.177415	chr11q13	64889609	chr11	97.88	64888102	-		ENSG00000149806///ENSG00000235297///OTTHUMG00000158397///OTTHUMG00000165606	Finkel-Biskis-Reilly murine sarcoma virus (FBR-MuSV) ubiquitously expressed	Human Genome U133 Plus 2.0 Array	February 2009 (Genome Reference Consortium GRCh37)	GO:0000184|GO:0006412|GO:0006412|GO:0006413|GO:0006414|GO:0006415|GO:0006614|GO:0010467|GO:0016032|GO:0016070|GO:0016071|GO:0019058|GO:0019083|GO:0044267|GO:0005622|GO:0005829|GO:0005840|GO:0015935|GO:0022627|GO:0030529|GO:0003723|GO:0003735|GO:0005515	IPR000626 // Ubiquitin // 1.3E-18///IPR000626 // Ubiquitin // 3.7E-19///IPR000626 // Ubiquitin // 2.3E-19///IPR000626 // Ubiquitin // 7.4E-19///IPR006846 // Ribosomal protein S30 // 1.3E-34///IPR006846 // Ribosomal protein S30 // 3.0E-35///IPR006846 // Ribosomal protein S30 // 6.1E-21///IPR022617 // Small ubiquitin-related modifier, SUMO // 3.4E-9///IPR022617 // Small ubiquitin-related modifier, …		134690	Ribosomal_Proteins // GenMAPP///Ribosomal_Proteins // GenMAPP///Ribosomal_Proteins // GenMAPP	NP_001988	NM_001997	NM_001997	GenBank
200020_at	933.908	861.032	821.136	950.333	1240.42	1214.92	0	0.125881	-0.0963502	0.312672	0.770479	0.513071	P	P	P	P	P	P	TARDBP	23435	0006351 // transcription, DNA-dependent // inferred from electronic annotation///0006355 // regulation of transcription, DNA-dependent // inferred from electronic annotation///0006366 // transcription from RNA polymerase II promoter // traceable author statement///0006397 // mRNA processing // inferred from electronic annotation///0008219 // cell death // inferred from electronic annotation///000…	0005634 // nucleus // inferred from direct assay///0005730 // nucleolus // inferred from direct assay	0000166 // nucleotide binding // inferred from electronic annotation///0003676 // nucleic acid binding // inferred from electronic annotation///0003677 // DNA binding // inferred from electronic annotation///0003690 // double-stranded DNA binding // inferred from direct assay///0003700 // sequence-specific DNA binding transcription factor activity // traceable author statement///0003723 // RNA bi…	chr1:11072728-11084101 (+) // 99.02 // p36.22	2013-10-23	This probe set was annotated using the Matching Probes based pipeline to a Entrez Gene identifier using 5 transcripts. // false // Matching Probes // A		BC071657(11),BC095435(11),ENST00000240185(11),ENST00000315091(11),NM_007375(11)	Hs.193989	chr1p36.22	11084101	chr1	99.02	11072728	+		ENSG00000120948///OTTHUMG00000002120	TAR DNA binding protein	Human Genome U133 Plus 2.0 Array	February 2009 (Genome Reference Consortium GRCh37)	GO:0006351|GO:0006355|GO:0006366|GO:0006397|GO:0008219|GO:0008380|GO:0043922|GO:0070935|GO:0005634|GO:0005730|GO:0000166|GO:0003676|GO:0003677|GO:0003690|GO:0003700|GO:0003723|GO:0003730|GO:0005515|GO:0042802	IPR000504 // RNA recognition motif domain // 4.5E-20///IPR000504 // RNA recognition motif domain // 2.0E-15///IPR000504 // RNA recognition motif domain // 2.6E-20///IPR000504 // RNA recognition motif domain // 1.2E-15		605078///612069		NP_031401	NM_007375	NM_007375	GenBank
200021_at	8243.99	7655.51	7996.18	7356.81	7852.73	7147.24	-0.0452771	0.0909734	0	0.077981	0.245577	-0.117667	P	P	P	P	P	P	CFL1	1072	0000910 // cytokinesis // inferred from electronic annotation///0001755 // neural crest cell migration // inferred from electronic annotation///0001842 // neural fold formation // inferred from electronic annotation///0002576 // platelet degranulation // traceable author statement///0006468 // protein phosphorylation // inferred from electronic annotation///0006928 // cellular component movement …	0005622 // intracellular // inferred from electronic annotation///0005634 // nucleus // traceable author statement///0005737 // cytoplasm // traceable author statement///0005856 // cytoskeleton // inferred from electronic annotation///0005886 // plasma membrane // inferred from electronic annotation///0015629 // actin cytoskeleton // inferred from electronic annotation///0016020 // membrane // in…	0003779 // actin binding // inferred from electronic annotation///0005515 // protein binding // inferred from physical interaction	chr11:65622307-65625621 (-) // 98.96 // q13.1	2013-10-23	This probe set was annotated using the Matching Probes based pipeline to a Entrez Gene identifier using 11 transcripts. // false // Matching Probes // A	BT006846 // gb // 2 // Cross Hyb Matching Probes///D00682 // gb // 2 // Cross Hyb Matching Probes///GENSCAN00000036958 // ensembl // 2 // Cross Hyb Matching Probes///GENSCAN00000037253 // ensembl // 2 // Cross Hyb Matching Probes///ENST00000531413 // ensembl // 2 // Cross Hyb Matching Probes///ENST00000534769 // ensembl // 2 // Cross Hyb Matching Probes///ENST00000531407 // ensembl // 7 // Cross …	AK097690(11),BC011005(11),BC012265(11),BC012318(11),BC018256(11),ENST00000308162(11),ENST00000524553(9),ENST00000525451(11),ENST00000527344(10),ENST00000530945(11),NM_005507(11)	Hs.180370	chr11q13	65625621	chr11	98.96	65622307	-		ENSG00000172757///OTTHUMG00000166602	cofilin 1 (non-muscle)	Human Genome U133 Plus 2.0 Array	February 2009 (Genome Reference Consortium GRCh37)	GO:0000910|GO:0001755|GO:0001842|GO:0002576|GO:0006468|GO:0006928|GO:0007010|GO:0007015|GO:0007266|GO:0007411|GO:0007596|GO:0009615|GO:0022604|GO:0030010|GO:0030036|GO:0030042|GO:0030168|GO:0030836|GO:0038096|GO:0043066|GO:0043200|GO:0045087|GO:0005622|GO:0005634|GO:0005737|GO:0005856|GO:0005886|GO:0015629|GO:0016020|GO:0016363|GO:0030864|GO:0031258|GO:0032587|GO:0042995|GO:0003779|GO:0005515	IPR002108 // Actin-binding, cofilin/tropomyosin type // 3.8E-44///IPR002108 // Actin-binding, cofilin/tropomyosin type // 2.6E-44		601442	G13_Signaling_Pathway // GenMAPP	NP_005498	NM_005507	NM_005507	GenBank
200022_at	6005.5	6120.52	5697.99	6533.52	6021.03	6402.97	-0.0134797	0.256988	0	0.395617	0.351251	0.212543	P	P	P	P	P	P	RPL18	6141	0000184 // nuclear-transcribed mRNA catabolic process, nonsense-mediated decay // traceable author statement///0006412 // translation // non-traceable author statement///0006412 // translation // traceable author statement///0006413 // translational initiation // traceable author statement///0006414 // translational elongation // traceable author statement///0006415 // translational termination /…	0005622 // intracellular // inferred from electronic annotation///0005737 // cytoplasm // inferred from electronic annotation///0005829 // cytosol // traceable author statement///0005840 // ribosome // inferred from electronic annotation///0022625 // cytosolic large ribosomal subunit // inferred from direct assay///0030529 // ribonucleoprotein complex // inferred from electronic annotation	0003723 // RNA binding // traceable author statement///0003735 // structural constituent of ribosome // non-traceable author statement	chr19:49118588-49121135 (-) // 96.03 // q13.33	2013-10-23	This probe set was annotated using the Matching Probes based pipeline to a Entrez Gene identifier using 22 transcripts. // false // Matching Probes // A	TCONS_l2_00004485-XLOC_l2_002290 // broad-tucp // 2 // Cross Hyb Matching Probes///TCONS_l2_00010291-XLOC_l2_005557 // broad-tucp // 4 // Cross Hyb Matching Probes///TCONS_l2_00010290-XLOC_l2_005557 // broad-tucp // 4 // Cross Hyb Matching Probes///n146498 // noncode // 2 // Cross Hyb Matching Probes///GENSCAN00000025486 // ensembl // 2 // Cross Hyb Matching Probes///GENSCAN00000026072 // ensembl…	AK091257(11),AK293386(10),BC000374(11),BC009708(11),BC021743(11),ENST00000084795(11),ENST00000546623(11),ENST00000547892(11),ENST00000547897(10),ENST00000549273(11),ENST00000549370(11),ENST00000549920(11),ENST00000550645(10),ENST00000550973(11),ENST00000551749(11),ENST00000552347(11),ENST00000552588(11),ENST00000552705(10),L11566(11),NM_000979(11),NM_001270490(11),NR_073022(11)	Hs.75458	chr19q13	49121135	chr19	96.03	49118588	-		ENSG00000063177///OTTHUMG00000169760	ribosomal protein L18	Human Genome U133 Plus 2.0 Array	February 2009 (Genome Reference Consortium GRCh37)	GO:0000184|GO:0006412|GO:0006412|GO:0006413|GO:0006414|GO:0006415|GO:0006614|GO:0010467|GO:0016032|GO:0016070|GO:0016071|GO:0019058|GO:0019083|GO:0044267|GO:0005622|GO:0005737|GO:0005829|GO:0005840|GO:0022625|GO:0030529|GO:0003723|GO:0003735	IPR021131 // Ribosomal protein L18e/L15P // 6.9E-31///IPR021131 // Ribosomal protein L18e/L15P // 1.1E-20///IPR021131 // Ribosomal protein L18e/L15P // 7.2E-31///IPR021131 // Ribosomal protein L18e/L15P // 7.3E-21///IPR021131 // Ribosomal protein L18e/L15P // 3.4E-23///IPR021131 // Ribosomal protein L18e/L15P // 4.8E-22///IPR021131 // Ribosomal protein L18e/L15P // 4.5E-31///IPR021131 // Ribosoma…		604179	Ribosomal_Proteins // GenMAPP	NP_000970///NP_001257419	NM_000979///NM_001270490///NR_073022	NM_000979	GenBank
200023_s_at	3612.26	3812.83	3696.19	3952.89	3162.83	4022.05	-0.122445	0.19861	0	0.295079	0.0468707	0.166148	P	P	P	P	P	P	EIF3F	8665	0001731 // formation of translation preinitiation complex // inferred from electronic annotation///0006412 // translation // traceable author statement///0006413 // translational initiation // inferred by curator///0006413 // translational initiation // inferred from direct assay///0006413 // translational initiation // traceable author statement///0006446 // regulation of translational initiatio…	0005737 // cytoplasm // inferred from electronic annotation///0005829 // cytosol // traceable author statement///0005852 // eukaryotic translation initiation factor 3 complex // inferred from direct assay///0005852 // eukaryotic translation initiation factor 3 complex // traceable author statement///0016282 // eukaryotic 43S preinitiation complex // inferred from electronic annotation///0033290 /…	0003743 // translation initiation factor activity // inferred by curator///0003743 // translation initiation factor activity // inferred from direct assay///0003743 // translation initiation factor activity // traceable author statement///0005515 // protein binding // inferred from physical interaction///0008233 // peptidase activity // inferred from electronic annotation///0008234 // cysteine-ty…	chr11:8008893-8017711 (+) // 90.74 // p15.4///chr2:58478568-58479802 (+) // 89.68 // p16.1	2013-10-23	This probe set was annotated using the Matching Probes based pipeline to a Entrez Gene identifier using 18 transcripts. // false // Matching Probes // A	GENSCAN00000028126 // ensembl // 7 // Cross Hyb Matching Probes///ENST00000528763 // ensembl // 5 // Cross Hyb Matching Probes///ENST00000531572 // ensembl // 4 // Cross Hyb Matching Probes///ENST00000434851 // ensembl // 7 // Cross Hyb Matching Probes///ENST00000537214 // ensembl // 2 // Cross Hyb Matching Probes///OTTHUMT00000385719 // vega // 5 // Cross Hyb Matching Probes///OTTHUMT00000385720…	AK027739(11),AK093511(11),AK095574(11),AK289637(11),AK291354(11),AK293826(11),AK297621(11),BC000490(11),BT006894(11),CR456959(11),ENST00000309828(11),ENST00000449102(11),ENST00000530219(11),ENST00000531329(11),ENST00000533626(11),ENST00000537635(11),NM_003754(11),U94855(11)	Hs.7811	chr11p15.4	8017711	chr11	90.74	8008893	+	EC:3.4.19.12	ENSG00000175390///ENSG00000233426///OTTHUMG00000165675	eukaryotic translation initiation factor 3, subunit F	Human Genome U133 Plus 2.0 Array	February 2009 (Genome Reference Consortium GRCh37)	GO:0001731|GO:0006412|GO:0006413|GO:0006413|GO:0006413|GO:0006446|GO:0006508|GO:0010467|GO:0044267|GO:0005737|GO:0005829|GO:0005852|GO:0005852|GO:0016282|GO:0033290|GO:0003743|GO:0003743|GO:0003743|GO:0005515|GO:0008233|GO:0008234|GO:0016787	IPR000555 // JAB1/Mov34/MPN/PAD-1 // 1.2E-28///IPR000555 // JAB1/Mov34/MPN/PAD-1 // 1.3E-28///IPR000555 // JAB1/Mov34/MPN/PAD-1 // 1.8E-11		603914	Translation_Factors // GenMAPP	NP_003745	NM_003754	NM_003754	GenBank
200024_at	4656.13	4714.03	4622.72	4783.34	4992.77	5966.15	-0.0789189	0.182005	0	0.247489	0.382796	0.412316	P	P	P	P	P	P	RPS5	6193	0000184 // nuclear-transcribed mRNA catabolic process, nonsense-mediated decay // traceable author statement///0006412 // translation // inferred by curator///0006412 // translation // inferred from genetic interaction///0006412 // translation // non-traceable author statement///0006412 // translation // traceable author statement///0006413 // translational initiation // inferred by curator///000…	0005829 // cytosol // traceable author statement///0005840 // ribosome // inferred from electronic annotation///0015935 // small ribosomal subunit // inferred from electronic annotation///0022627 // cytosolic small ribosomal subunit // inferred from direct assay///0030529 // ribonucleoprotein complex // inferred from direct assay	0003723 // RNA binding // non-traceable author statement///0003729 // mRNA binding // inferred from direct assay///0003735 // structural constituent of ribosome // inferred from direct assay	chr19:58898670-58906170 (+) // 98.87 // q13.43	2013-10-23	This probe set was annotated using the Matching Probes based pipeline to a Entrez Gene identifier using 12 transcripts. // false // Matching Probes // A	n335589 // noncode // 5 // Cross Hyb Matching Probes///GENSCAN00000004132 // ensembl // 2 // Cross Hyb Matching Probes///GENSCAN00000008164 // ensembl // 2 // Cross Hyb Matching Probes///GENSCAN00000028182 // ensembl // 2 // Cross Hyb Matching Probes///GENSCAN00000042955 // ensembl // 7 // Cross Hyb Matching Probes///GENSCAN00000051636 // ensembl // 2 // Cross Hyb Matching Probes///ENST0000059809…	AK223106(10),BC015405(10),BC018151(10),BC035830(10),ENST00000196551(10),ENST00000596046(10),ENST00000596314(9),ENST00000598495(10),ENST00000599232(10),ENST00000601521(10),NM_001009(10),U14970(11)	Hs.76194	chr19q13.4	58906170	chr19	98.87	58898670	+		ENSG00000083845///OTTHUMG00000183530	ribosomal protein S5	Human Genome U133 Plus 2.0 Array	February 2009 (Genome Reference Consortium GRCh37)	GO:0000184|GO:0006412|GO:0006412|GO:0006412|GO:0006412|GO:0006413|GO:0006413|GO:0006414|GO:0006415|GO:0006450|GO:0006614|GO:0010467|GO:0016032|GO:0016070|GO:0016071|GO:0019058|GO:0019083|GO:0044267|GO:0005829|GO:0005840|GO:0015935|GO:0022627|GO:0030529|GO:0003723|GO:0003729|GO:0003735	IPR023798 // Ribosomal protein S7 domain // 4.6E-45///IPR023798 // Ribosomal protein S7 domain // 1.2E-42///IPR023798 // Ribosomal protein S7 domain // 6.3E-45		603630	Ribosomal_Proteins // GenMAPP	NP_001000	NM_001009	NM_001009	GenBank
200025_s_at	9291.27	7238.2	8751.4	9945.89	7442.98	9595.45	0	-0.117152	0.00294542	0.385742	0.0410061	0.180037	P	P	P	P	P	P	RPL27	6155	0000184 // nuclear-transcribed mRNA catabolic process, nonsense-mediated decay // traceable author statement///0006351 // transcription, DNA-dependent // inferred from electronic annotation///0006355 // regulation of transcription, DNA-dependent // inferred from electronic annotation///0006355 // regulation of transcription, DNA-dependent // non-traceable author statement///0006412 // translation…	0005622 // intracellular // inferred from electronic annotation///0005634 // nucleus // inferred from electronic annotation///0005634 // nucleus // non-traceable author statement///0005829 // cytosol // traceable author statement///0005840 // ribosome // traceable author statement///0022625 // cytosolic large ribosomal subunit // inferred from direct assay///0030529 // ribonucleoprotein complex /…	0003676 // nucleic acid binding // inferred from electronic annotation///0003677 // DNA binding // inferred from electronic annotation///0003700 // sequence-specific DNA binding transcription factor activity // non-traceable author statement///0003735 // structural constituent of ribosome // non-traceable author statement///0003735 // structural constituent of ribosome // traceable author stateme…	chr17:41150759-41154969 (+) // 94.54 // q21.31	2013-10-23	This probe set was annotated using the Matching Probes based pipeline to a Entrez Gene identifier using 17 transcripts. // false // Matching Probes // A	n382149 // noncode // 2 // Cross Hyb Matching Probes///GENSCAN00000017010 // ensembl // 2 // Cross Hyb Matching Probes///GENSCAN00000022672 // ensembl // 6 // Cross Hyb Matching Probes///GENSCAN00000041302 // ensembl // 4 // Cross Hyb Matching Probes///GENSCAN00000043712 // ensembl // 2 // Cross Hyb Matching Probes///ENST00000480072 // ensembl // 2 // Cross Hyb Matching Probes///ENST00000468034 /…	AK124148(11),BC001700(11),BC002588(11),BC007273(11),BC010026(11),BC021886(11),BC098560(11),ENST00000253788(11),ENST00000586277(11),ENST00000588830(10),ENST00000589037(11),ENST00000589913(11),ENST00000590864(11),ENST00000593262(11),L05094(11),L19527(11),NM_000988(11)	Hs.111611	chr17q21	41154969	chr17	94.54	41150759	+	EC:3.6.5.3	ENSG00000131469///OTTHUMG00000180660	ribosomal protein L27	Human Genome U133 Plus 2.0 Array	February 2009 (Genome Reference Consortium GRCh37)	GO:0000184|GO:0006351|GO:0006355|GO:0006355|GO:0006412|GO:0006412|GO:0006413|GO:0006414|GO:0006415|GO:0006614|GO:0010467|GO:0016032|GO:0016070|GO:0016071|GO:0019058|GO:0019083|GO:0044267|GO:0005622|GO:0005634|GO:0005634|GO:0005829|GO:0005840|GO:0022625|GO:0030529|GO:0003676|GO:0003677|GO:0003700|GO:0003735|GO:0003735|GO:0046872	IPR001141 // Ribosomal protein L27e // 2.3E-42///IPR001141 // Ribosomal protein L27e // 1.4E-42///IPR001141 // Ribosomal protein L27e // 2.2E-41///IPR005824 // KOW // 6.0E-10///IPR005824 // KOW // 9.8E-11		607526	Ribosomal_Proteins // GenMAPP///Ribosomal_Proteins // GenMAPP	NP_000979	NM_000988	NM_000988	GenBank
200026_at	6884.72	7013.12	6996.4	7785.12	6830.25	7621.03	-0.112523	0.157229	0	0.352317	0.237019	0.167631	P	P	P	P	P	P	RPL34	6164	0000184 // nuclear-transcribed mRNA catabolic process, nonsense-mediated decay // traceable author statement///0006412 // translation // non-traceable author statement///0006412 // translation // traceable author statement///0006413 // translational initiation // traceable author statement///0006414 // translational elongation // traceable author statement///0006415 // translational termination /…	0005622 // intracellular // inferred from electronic annotation///0005829 // cytosol // traceable author statement///0005840 // ribosome // inferred from electronic annotation///0022625 // cytosolic large ribosomal subunit // inferred from direct assay///0030529 // ribonucleoprotein complex // inferred from electronic annotation	0003723 // RNA binding // traceable author statement///0003735 // structural constituent of ribosome // non-traceable author statement	chr4:109543104-109546385 (+) // 96.68 // q25	2013-10-23	This probe set was annotated using the Matching Probes based pipeline to a Entrez Gene identifier using 16 transcripts. // false // Matching Probes // A	n125624 // noncode // 2 // Cross Hyb Matching Probes///AK055920 // gb // 6 // Cross Hyb Matching Probes///GENSCAN00000029743 // ensembl // 2 // Cross Hyb Matching Probes///GENSCAN00000042905 // ensembl // 4 // Cross Hyb Matching Probes///GENSCAN00000045350 // ensembl // 2 // Cross Hyb Matching Probes///ENST00000503574 // ensembl // 6 // Cross Hyb Matching Probes///ENST00000466433 // ensembl // 2 …	AF147334(9),AY762981(9),BC001773(10),BC070208(10),BC106009(10),CR542232(10),CR542242(10),ENST00000394665(10),ENST00000394667(10),ENST00000394668(10),ENST00000502534(10),ENST00000504231(9),ENST00000506397(10),L38941(11),NM_000995(10),NM_033625(10)	Hs.250895	chr4q25	109546385	chr4	96.68	109543104	+		ENSG00000109475///OTTHUMG00000131839	ribosomal protein L34	Human Genome U133 Plus 2.0 Array	February 2009 (Genome Reference Consortium GRCh37)	GO:0000184|GO:0006412|GO:0006412|GO:0006413|GO:0006414|GO:0006415|GO:0006614|GO:0010467|GO:0016032|GO:0016070|GO:0016071|GO:0019058|GO:0019083|GO:0044267|GO:0005622|GO:0005829|GO:0005840|GO:0022625|GO:0030529|GO:0003723|GO:0003735	IPR008195 // Ribosomal protein L34Ae // 1.7E-41			Ribosomal_Proteins // GenMAPP	NP_000986///NP_296374	NM_000995///NM_033625	NM_000995	GenBank
200027_at	2175.34	1798.36	1794.55	1862.62	1900.1	1717.89	0.0314627	0	-0.156844	0.0950742	0.197306	-0.175573	P	P	P	P	P	P	NARS	4677	0006412 // translation // inferred from electronic annotation///0006418 // tRNA aminoacylation for protein translation // traceable author statement///0006421 // asparaginyl-tRNA aminoacylation // inferred from electronic annotation///0010467 // gene expression // traceable author statement	0005737 // cytoplasm // inferred from direct assay///0005739 // mitochondrion // inferred from electronic annotation///0005829 // cytosol // traceable author statement	0000166 // nucleotide binding // inferred from electronic annotation///0003676 // nucleic acid binding // inferred from electronic annotation///0004812 // aminoacyl-tRNA ligase activity // inferred from electronic annotation///0004816 // asparagine-tRNA ligase activity // inferred from electronic annotation///0005524 // ATP binding // inferred from electronic annotation///0016874 // ligase activi…	chr18:55267895-55289013 (-) // 99.37 // q21.31	2013-10-23	This probe set was annotated using the Matching Probes based pipeline to a Entrez Gene identifier using 4 transcripts. // false // Matching Probes // A		BC001687(11),D84273(11),ENST00000256854(11),NM_004539(11)	Hs.181311	chr18q21.31	55289013	chr18	99.37	55267895	-	EC:6.1.1.22	ENSG00000134440///OTTHUMG00000180125	asparaginyl-tRNA synthetase	Human Genome U133 Plus 2.0 Array	February 2009 (Genome Reference Consortium GRCh37)	GO:0006412|GO:0006418|GO:0006421|GO:0010467|GO:0005737|GO:0005739|GO:0005829|GO:0000166|GO:0003676|GO:0004812|GO:0004816|GO:0005524|GO:0016874	IPR004364 // Aminoacyl-tRNA synthetase, class II (D/K/N) // 2.0E-80///IPR004365 // Nucleic acid binding, OB-fold, tRNA/helicase-type // 4.5E-14		108410		NP_004530	NM_004539	NM_004539	GenBank
200028_s_at	1164.27	1094.95	1024.44	973.454	1110.72	1123.1	0	0.154544	-0.0952754	0.0292821	0.293082	0.0816302	P	P	P	P	P	P	STARD7	56910		0005739 // mitochondrion // inferred from electronic annotation		chr2:96850604-96874508 (-) // 95.78 // q11.2	2013-10-23	This probe set was annotated using the Matching Probes based pipeline to a Entrez Gene identifier using 14 transcripts. // false // Matching Probes // A	BC015559 // gb // 11 // Negative Strand Matching Probes	AF270647(11),AK094925(11),BC007894(11),BC008894(11),BC009998(11),BC012774(11),BC012793(11),BC013279(11),BC014076(11),BC014274(11),BC032106(11),ENST00000337288(11),ENST00000479456(11),NM_020151(11)	Hs.283722	chr2q11.2	96874508	chr2	95.78	96850604	-		ENSG00000084090///OTTHUMG00000130457	StAR-related lipid transfer (START) domain containing 7	Human Genome U133 Plus 2.0 Array	February 2009 (Genome Reference Consortium GRCh37)	GO:0005739	IPR002913 // START domain // 1.4E-19				NP_064536	NM_020151///NM_139267	NM_020151	GenBank
200029_at	6717.75	6294.69	6464.74	7212.54	5947.48	6659.96	-0.0339198	0.115331	0	0.356125	0.151381	0.0871801	P	P	P	P	P	P	RPL19	6143	0000184 // nuclear-transcribed mRNA catabolic process, nonsense-mediated decay // traceable author statement///0006412 // translation // non-traceable author statement///0006412 // translation // traceable author statement///0006413 // translational initiation // traceable author statement///0006414 // translational elongation // traceable author statement///0006415 // translational termination /…	0005622 // intracellular // inferred from electronic annotation///0005829 // cytosol // traceable author statement///0005840 // ribosome // inferred from electronic annotation///0022625 // cytosolic large ribosomal subunit // inferred from direct assay///0022625 // cytosolic large ribosomal subunit // traceable author statement///0030529 // ribonucleoprotein complex // inferred from electronic an…	0003723 // RNA binding // traceable author statement///0003735 // structural constituent of ribosome // non-traceable author statement///0003735 // structural constituent of ribosome // traceable author statement	chr17:37356570-37360980 (+) // 99.86 // q12///chr5:177482577-177483269 (+) // 96.42 // q35.3	2013-10-23	This probe set was annotated using the Matching Probes based pipeline to a Entrez Gene identifier using 12 transcripts. // false // Matching Probes // A	uc011klk.1 // ucsc_genes // 2 // Cross Hyb Matching Probes///n387641 // noncode // 2 // Cross Hyb Matching Probes///NR_026660 // refseq // 2 // Cross Hyb Matching Probes///AB019566 // gb // 5 // Cross Hyb Matching Probes///GENSCAN00000015247 // ensembl // 2 // Cross Hyb Matching Probes///GENSCAN00000016924 // ensembl // 2 // Cross Hyb Matching Probes///GENSCAN00000052259 // ensembl // 2 // Cross …	BC000530(11),BC013016(11),BC062709(11),BC066315(11),BC095445(11),BX537435(11),ENST00000225430(11),ENST00000577741(11),ENST00000579260(11),ENST00000579374(11),ENST00000582193(11),NM_000981(11)	Hs.252723	chr17q12	37360980	chr17	99.86	37356570	+		ENSG00000108298///ENSG00000218227///OTTHUMG00000157953///OTTHUMG00000178979	ribosomal protein L19	Human Genome U133 Plus 2.0 Array	February 2009 (Genome Reference Consortium GRCh37)	GO:0000184|GO:0006412|GO:0006412|GO:0006413|GO:0006414|GO:0006415|GO:0006614|GO:0010467|GO:0016032|GO:0016070|GO:0016071|GO:0019058|GO:0019083|GO:0044267|GO:0005622|GO:0005829|GO:0005840|GO:0022625|GO:0022625|GO:0030529|GO:0003723|GO:0003735|GO:0003735	IPR000196 // Ribosomal protein L19/L19e domain // 2.4E-67///IPR000196 // Ribosomal protein L19/L19e domain // 6.0E-67///IPR000196 // Ribosomal protein L19/L19e domain // 2.9E-67		180466	mRNA_processing_binding_Reactome // GenMAPP///Ribosomal_Proteins // GenMAPP///Ribosomal_Proteins // GenMAPP///Ribosomal_Proteins // GenMAPP	NP_000972	NM_000981	NM_000981	GenBank
200030_s_at	5007.24	5317.45	5199.48	5686.7	5664.25	5285.37	-0.14366	0.186152	0	0.327435	0.395211	0.067894	P	P	P	P	P	P	SLC25A3	5250	0006091 // generation of precursor metabolites and energy // traceable author statement///0006810 // transport // traceable author statement	0005739 // mitochondrion // inferred from direct assay///0005743 // mitochondrial inner membrane // inferred from electronic annotation///0005887 // integral to plasma membrane // traceable author statement///0016020 // membrane // inferred from electronic annotation///0016021 // integral to membrane // inferred from electronic annotation	0015293 // symporter activity // inferred from electronic annotation///0015320 // phosphate ion carrier activity // traceable author statement	chr12:98987474-98995485 (+) // 98.42 // q23.1	2013-10-23	This probe set was annotated using the Matching Probes based pipeline to a Entrez Gene identifier using 25 transcripts. // false // Matching Probes // A	TCONS_l2_00002500-XLOC_l2_000915 // broad-tucp // 2 // Cross Hyb Matching Probes///uc009vzj.2 // ucsc_genes // 2 // Cross Hyb Matching Probes///n385937 // noncode // 2 // Cross Hyb Matching Probes///AK097753 // gb // 2 // Cross Hyb Matching Probes///NR_002314 // refseq // 2 // Cross Hyb Matching Probes///ENST00000566100 // ensembl // 2 // Cross Hyb Matching Probes///ENST00000569142 // ensembl // …	AB064666(11),BC000998(11),BC001328(11),BC003504(11),BC004345(11),BC006455(11),BC011574(11),BC011641(11),BC014019(11),BC051367(11),BX647062(11),ENST00000188376(11),ENST00000228318(11),ENST00000401722(11),ENST00000546766(11),ENST00000547869(10),ENST00000548480(11),ENST00000548847(10),ENST00000549338(11),ENST00000551123(11),ENST00000551917(11),ENST00000552981(11),NM_002635(11),NM_005888(11),NM_21361…	Hs.78713	chr12q23	98995485	chr12	98.42	98987474	+		ENSG00000075415///OTTHUMG00000170212	solute carrier family 25 (mitochondrial carrier; phosphate carrier), member 3	Human Genome U133 Plus 2.0 Array	February 2009 (Genome Reference Consortium GRCh37)	GO:0006091|GO:0006810|GO:0005739|GO:0005743|GO:0005887|GO:0016020|GO:0016021|GO:0015293|GO:0015320	IPR018108 // Mitochondrial substrate/solute carrier // 1.7E-25///IPR018108 // Mitochondrial substrate/solute carrier // 8.9E-23///IPR018108 // Mitochondrial substrate/solute carrier // 1.3E-13///IPR018108 // Mitochondrial substrate/solute carrier // 2.2E-25///IPR018108 // Mitochondrial substrate/solute carrier // 8.9E-23///IPR018108 // Mitochondrial substrate/solute carrier // 1.4E-13///IPR018108…		600370///610773		NP_002626///NP_005879///NP_998776	NM_002635///NM_005888///NM_213611///NM_213612	NM_002635	GenBank
200031_s_at	10647.8	9654.51	9890.45	10662.6	9326.01	10499.3	0	0.101819	-0.0171361	0.289522	0.169782	0.113302	P	P	P	P	P	P	RPS11///SNORD35B	6205///84546	0000184 // nuclear-transcribed mRNA catabolic process, nonsense-mediated decay // traceable author statement///0006412 // translation // inferred by curator///0006412 // translation // non-traceable author statement///0006412 // translation // traceable author statement///0006413 // translational initiation // traceable author statement///0006414 // translational elongation // traceable author st…	0005622 // intracellular // inferred from electronic annotation///0005829 // cytosol // traceable author statement///0005840 // ribosome // non-traceable author statement///0022627 // cytosolic small ribosomal subunit // inferred from direct assay///0030529 // ribonucleoprotein complex // inferred from electronic annotation	0003723 // RNA binding // inferred from electronic annotation///0003735 // structural constituent of ribosome // inferred from electronic annotation///0019843 // rRNA binding // inferred from electronic annotation	chr12:133402276-133402823 (+) // 95.58 // q24.33///chr19:50000448-50002944 (+) // 94.66 // q13.33	2013-10-23	This probe set was annotated using the Matching Probes based pipeline to a Entrez Gene identifier using 26 transcripts. // true // Matching Probes // A	GENSCAN00000018540 // ensembl // 2 // Cross Hyb Matching Probes///GENSCAN00000019239 // ensembl // 4 // Cross Hyb Matching Probes///GENSCAN00000025239 // ensembl // 7 // Cross Hyb Matching Probes///ENST00000442125 // ensembl // 4 // Cross Hyb Matching Probes///ENST00000420757 // ensembl // 2 // Cross Hyb Matching Probes///ENST00000425052 // ensembl // 7 // Cross Hyb Matching Probes///ENST00000488…	uc002pob.1(11),BC024649(11),BC007283(11),BC007603(11),BC007945(11),BC010028(11),BC016378(11),BC070224(11),BC100025(11),NM_001015(11),GENSCAN00000029369(11),ENST00000600027(11),ENST00000599167(11),ENST00000270625(11),ENST00000602252(11),ENST00000596873(11),ENST00000594493(11),ENST00000601216(11),ENST00000599561(11),ENST00000601306(11),OTTHUMT00000465291(11),OTTHUMT00000465287(11),OTTHUMT0000046528…	Hs.182740	chr19q13.3	133402823	chr12	95.58	133402276	+		ENSG00000142534///OTTHUMG00000183156	ribosomal protein S11///small nucleolar RNA, C/D box 35B	Human Genome U133 Plus 2.0 Array	February 2009 (Genome Reference Consortium GRCh37)	GO:0000184|GO:0006412|GO:0006412|GO:0006412|GO:0006413|GO:0006414|GO:0006415|GO:0006614|GO:0010467|GO:0016032|GO:0016070|GO:0016071|GO:0019058|GO:0019083|GO:0044267|GO:0005622|GO:0005829|GO:0005840|GO:0022627|GO:0030529|GO:0003723|GO:0003735|GO:0019843	IPR000266 // Ribosomal protein S17 // 5.5E-35///IPR000266 // Ribosomal protein S17 // 1.2E-19///IPR000266 // Ribosomal protein S17 // 1.1E-33		180471	mRNA_processing_binding_Reactome // GenMAPP///Ribosomal_Proteins // GenMAPP///Ribosomal_Proteins // GenMAPP///Ribosomal_Proteins // GenMAPP	NP_001006	NM_001015///NR_001285	NM_001015	GenBank
200032_s_at	8795.66	8410.77	8480.16	9840.58	8517.45	9426.22	-0.0366073	0.141934	0	0.412864	0.278025	0.196846	P	P	P	P	P	P	RPL9	6133	0000184 // nuclear-transcribed mRNA catabolic process, nonsense-mediated decay // traceable author statement///0006412 // translation // non-traceable author statement///0006412 // translation // traceable author statement///0006413 // translational initiation // traceable author statement///0006414 // translational elongation // traceable author statement///0006415 // translational termination /…	0005622 // intracellular // inferred from electronic annotation///0005730 // nucleolus // inferred from direct assay///0005737 // cytoplasm // inferred from direct assay///0005739 // mitochondrion // inferred from electronic annotation///0005829 // cytosol // traceable author statement///0005840 // ribosome // traceable author statement///0022625 // cytosolic large ribosomal subunit // inferred f…	0003723 // RNA binding // traceable author statement///0003735 // structural constituent of ribosome // non-traceable author statement///0016740 // transferase activity // inferred from electronic annotation///0016746 // transferase activity, transferring acyl groups // inferred from electronic annotation///0019843 // rRNA binding // inferred from electronic annotation///0047961 // glycine N-acyl…	chr15:82664414-82665118 (-) // 98.74 // q25.2///chr15:83040955-83041659 (-) // 98.74 // q25.2///chr4:39455751-39460537 (-) // 99.72 // p14///chrX:23854760-23855463 (-) // 98.46 // p22.11	2013-10-23	This probe set was annotated using the Matching Probes based pipeline to a Entrez Gene identifier using 30 transcripts. // false // Matching Probes // A	uc003gud.1 // ucsc_genes // 6 // Cross Hyb Matching Probes///n325593 // noncode // 4 // Cross Hyb Matching Probes///n325594 // noncode // 4 // Cross Hyb Matching Probes///n325595 // noncode // 4 // Cross Hyb Matching Probes///AK130277 // gb // 4 // Cross Hyb Matching Probes///GENSCAN00000000536 // ensembl // 8 // Cross Hyb Matching Probes///GENSCAN00000006743 // ensembl // 4 // Cross Hyb Matching…	AB062431(11),AK297178(9),AK303908(11),AL832047(11),AY320412(11),AY376242(11),AY597415(11),BC000483(11),BC004156(11),BC004206(11),BC007967(11),BC012149(11),BC031906(11),BC066318(11),BC070214(11),BC100285(11),D14531(11),ENST00000295955(11),ENST00000437992(9),ENST00000449470(11),ENST00000503040(11),ENST00000503277(11),ENST00000504470(10),ENST00000508595(11),ENST00000511075(9),ENST00000514842(11),NM_…	Hs.157850	chr4p13	82665118	chr15	98.74	82664414	-		ENSG00000163682///ENSG00000230903///ENSG00000237550///ENSG00000238103///OTTHUMG00000021254///OTTHUMG00000099367///OTTHUMG00000158044///OTTHUMG00000158049	ribosomal protein L9	Human Genome U133 Plus 2.0 Array	February 2009 (Genome Reference Consortium GRCh37)	GO:0000184|GO:0006412|GO:0006412|GO:0006413|GO:0006414|GO:0006415|GO:0006614|GO:0010467|GO:0016032|GO:0016070|GO:0016071|GO:0019058|GO:0019083|GO:0044267|GO:0005622|GO:0005730|GO:0005737|GO:0005739|GO:0005829|GO:0005840|GO:0022625|GO:0030529|GO:0003723|GO:0003735|GO:0016740|GO:0016746|GO:0019843|GO:0047961	IPR020040 // Ribosomal protein L6, alpha-beta domain // 1.2E-20///IPR020040 // Ribosomal protein L6, alpha-beta domain // 5.4E-20///IPR020040 // Ribosomal protein L6, alpha-beta domain // 3.1E-18///IPR020040 // Ribosomal protein L6, alpha-beta domain // 5.2E-20///IPR020040 // Ribosomal protein L6, alpha-beta domain // 1.1E-20///IPR020040 // Ribosomal protein L6, alpha-beta domain // 4.8E-16///IPR…		603686	Ribosomal_Proteins // GenMAPP	NP_000652///NP_001020092	NM_000661///NM_001024921	NM_000661	GenBank
200033_at	5510.87	4294.01	4545.97	6155.22	4160.68	6983.52	0.116858	0	-0.071527	0.563907	0.0723991	0.592097	P	P	P	P	P	P	DDX5///MIR3064///MIR5047	1655///100616387///100616408	0000122 // negative regulation of transcription from RNA polymerase II promoter // inferred from direct assay///0000381 // regulation of alternative mRNA splicing, via spliceosome // inferred from direct assay///0000398 // mRNA splicing, via spliceosome // inferred by curator///0001701 // in utero embryonic development // inferred from electronic annotation///0006351 // transcription, DNA-depende…	0005634 // nucleus // inferred from direct assay///0005634 // nucleus // non-traceable author statement///0005681 // spliceosomal complex // inferred from electronic annotation///0005730 // nucleolus // inferred from direct assay///0030529 // ribonucleoprotein complex // inferred from direct assay///0071013 // catalytic step 2 spliceosome // inferred from direct assay	0000166 // nucleotide binding // inferred from electronic annotation///0003676 // nucleic acid binding // inferred from electronic annotation///0003712 // transcription cofactor activity // inferred from electronic annotation///0003713 // transcription coactivator activity // inferred from direct assay///0003723 // RNA binding // inferred from electronic annotation///0003724 // RNA helicase activ…	chr17:62495739-62502407 (-) // 99.57 // q23.3	2013-10-23	This probe set was annotated using the Matching Probes based pipeline to a Entrez Gene identifier using 36 transcripts. // true // Matching Probes // A	ENST00000580026 // ensembl // 4 // Cross Hyb Matching Probes///ENST00000578758 // ensembl // 4 // Cross Hyb Matching Probes///OTTHUMT00000445044 // vega // 4 // Cross Hyb Matching Probes///OTTHUMT00000445045 // vega // 4 // Cross Hyb Matching Probes	uc010deh.2(11),uc002jek.2(11),uc002jej.2(11),uc010wqa.1(11),AK310318(10),AK297192(11),AK297753(10),AK297905(11),AB451257(10),BC016027(11),BT006943(10),BX571764(11),NM_004396(11),GENSCAN00000006722(10),GENSCAN00000051010(10),ENST00000576550(10),ENST00000574715(11),ENST00000570644(11),ENST00000540698(11),ENST00000581693(11),ENST00000581230(11),ENST00000225792(11),ENST00000450599(11),ENST00000578804…	Hs.76053	chr17q21	62502407	chr17	99.57	62495739	-	EC:3.6.4.13	ENSG00000108654///ENSG00000263077///OTTHUMG00000178936///OTTHUMG00000179772	DEAD (Asp-Glu-Ala-Asp) box helicase 5///microRNA 3064///microRNA 5047	Human Genome U133 Plus 2.0 Array	February 2009 (Genome Reference Consortium GRCh37)	GO:0000122|GO:0000381|GO:0000398|GO:0001701|GO:0006351|GO:0006355|GO:0006397|GO:0007623|GO:0008380|GO:0016049|GO:0033148|GO:0043517|GO:0045069|GO:0045667|GO:0045893|GO:0045944|GO:0060765|GO:0072332|GO:2001014|GO:0005634|GO:0005634|GO:0005681|GO:0005730|GO:0030529|GO:0071013|GO:0000166|GO:0003676|GO:0003712|GO:0003713|GO:0003723|GO:0003724|GO:0003724|GO:0004004|GO:0004386|GO:0005515|GO:0005516|GO:…	IPR001650 // Helicase, C-terminal // 1.0E-29///IPR001650 // Helicase, C-terminal // 8.5E-30///IPR011545 // DNA/RNA helicase, DEAD/DEAH box type, N-terminal // 1.6E-51///IPR011545 // DNA/RNA helicase, DEAD/DEAH box type, N-terminal // 7.8E-38///IPR012587 // P68HR // 1.1E-22///IPR012587 // P68HR // 2.5E-20///IPR012587 // P68HR // 9.2E-23///IPR012587 // P68HR // 2.1E-20		180630		NP_004387	NM_004396///NR_039891///NR_039969	NM_004396	GenBank
200034_s_at	8735.12	7077.41	8371.33	8779.78	7387.22	9426.37	0	-0.0605125	0.0279374	0.294877	0.119206	0.243439	P	P	P	P	P	P	RPL6	6128	0000184 // nuclear-transcribed mRNA catabolic process, nonsense-mediated decay // traceable author statement///0006355 // regulation of transcription, DNA-dependent // traceable author statement///0006412 // translation // non-traceable author statement///0006412 // translation // traceable author statement///0006413 // translational initiation // traceable author statement///0006414 // translati…	0005622 // intracellular // inferred from electronic annotation///0005829 // cytosol // traceable author statement///0005840 // ribosome // inferred from electronic annotation///0022625 // cytosolic large ribosomal subunit // inferred from direct assay///0030529 // ribonucleoprotein complex // inferred from electronic annotation	0003677 // DNA binding // traceable author statement///0003723 // RNA binding // traceable author statement///0003735 // structural constituent of ribosome // non-traceable author statement	chr4:66439157-66440079 (+) // 97.52 // q13.1///chr7:137406713-137407632 (+) // 97.08 // q33///chr12:112842994-112847416 (-) // 99.68 // q24.13///chr18:6462109-6463028 (-) // 98.27 // p11.31	2013-10-23	This probe set was annotated using the Matching Probes based pipeline to a Entrez Gene identifier using 19 transcripts. // false // Matching Probes // A	TCONS_l2_00028151-XLOC_l2_014480 // broad-tucp // 1 // Cross Hyb Matching Probes///AK308469 // gb // 8 // Cross Hyb Matching Probes///AK095760 // gb // 3 // Cross Hyb Matching Probes///AK298117 // gb // 6 // Cross Hyb Matching Probes///GENSCAN00000014885 // ensembl // 7 // Cross Hyb Matching Probes///GENSCAN00000018848 // ensembl // 3 // Cross Hyb Matching Probes///GENSCAN00000023110 // ensembl /…	AF261087(11),AK299470(11),AY320410(9),BC004138(11),BC020679(11),BC022444(11),BC031009(11),BC032299(11),BC071912(11),BC104824(11),BC104826(11),D17554(11),ENST00000202773(11),ENST00000424576(11),ENST00000546368(9),ENST00000549923(10),ENST00000550238(9),NM_000970(11),NM_001024662(11)	Hs.174131	chr12q24.1	66440079	chr4	97.52	66439157	+		ENSG00000089009///ENSG00000235552///ENSG00000243199///OTTHUMG00000157492///OTTHUMG00000158161///OTTHUMG00000169685	ribosomal protein L6	Human Genome U133 Plus 2.0 Array	February 2009 (Genome Reference Consortium GRCh37)	GO:0000184|GO:0006355|GO:0006412|GO:0006412|GO:0006413|GO:0006414|GO:0006415|GO:0006614|GO:0010467|GO:0016032|GO:0016070|GO:0016071|GO:0019058|GO:0019083|GO:0044267|GO:0005622|GO:0005829|GO:0005840|GO:0022625|GO:0030529|GO:0003677|GO:0003723|GO:0003735	IPR000915 // Ribosomal protein L6E // 2.5E-44///IPR000915 // Ribosomal protein L6E // 8.1E-44///IPR005568 // Ribosomal protein L6, N-terminal // 9.5E-27		603703	Ribosomal_Proteins // GenMAPP	NP_000961///NP_001019833	NM_000970///NM_001024662	NM_000970	GenBank
200035_at	318.285	261.114	247.855	294.728	278.449	306.779	0.0425453	0	-0.228966	0.219133	0.210644	0.122992	P	P	P	P	P	P	CTDNEP1	23399	0006470 // protein dephosphorylation // inferred from direct assay///0006998 // nuclear envelope organization // inferred from direct assay///0010867 // positive regulation of triglyceride biosynthetic process // inferred from genetic interaction///0016311 // dephosphorylation // inferred from electronic annotation///0034504 // protein localization to nucleus // inferred from direct assay	0005634 // nucleus // inferred from electronic annotation///0005635 // nuclear envelope // inferred from direct assay///0005737 // cytoplasm // inferred from direct assay///0005783 // endoplasmic reticulum // inferred from electronic annotation///0005789 // endoplasmic reticulum membrane // inferred from direct assay///0016020 // membrane // inferred from electronic annotation///0016021 // integr…	0004721 // phosphoprotein phosphatase activity // inferred from electronic annotation///0004722 // protein serine/threonine phosphatase activity // inferred from mutant phenotype///0005515 // protein binding // inferred from physical interaction///0016787 // hydrolase activity // inferred from electronic annotation///0016791 // phosphatase activity // inferred from electronic annotation	chr3:113604115-113605474 (+) // 96.39 // q13.31///chr17:7146912-7154644 (-) // 98.23 // p13.1	2013-10-23	This probe set was annotated using the Matching Probes based pipeline to a Entrez Gene identifier using 6 transcripts. // false // Matching Probes // A	ENST00000570828 // ensembl // 5 // Cross Hyb Matching Probes///ENST00000574205 // ensembl // 5 // Cross Hyb Matching Probes///ENST00000572043 // ensembl // 4 // Cross Hyb Matching Probes///OTTHUMT00000440217 // vega // 4 // Cross Hyb Matching Probes///OTTHUMT00000440495 // vega // 5 // Cross Hyb Matching Probes///OTTHUMT00000440218 // vega // 5 // Cross Hyb Matching Probes///OTTHUMT00000440487 //…	BC009295(11),ENST00000318988(11),ENST00000573600(11),ENST00000574322(11),NM_001143775(11),NM_015343(11)	Hs.84359	chr17p13	113605474	chr3	96.39	113604115	+	EC:3.1.3.16	ENSG00000175826///OTTHUMG00000102180	CTD nuclear envelope phosphatase 1	Human Genome U133 Plus 2.0 Array	February 2009 (Genome Reference Consortium GRCh37)	GO:0006470|GO:0006998|GO:0010867|GO:0016311|GO:0034504|GO:0005634|GO:0005635|GO:0005737|GO:0005783|GO:0005789|GO:0016020|GO:0016021|GO:0031965|GO:0071595|GO:0004721|GO:0004722|GO:0005515|GO:0016787|GO:0016791	IPR004274 // NLI interacting factor // 5.4E-53		610684		NP_001137247///NP_056158	NM_001143775///NM_015343	NM_015343	GenBank
200036_s_at	3598.2	3596.99	3084.08	4389.82	3519.18	4658.59	0	0.242605	-0.133126	0.574403	0.328964	0.506181	P	P	P	P	P	P	RPL10A	4736	0000184 // nuclear-transcribed mRNA catabolic process, nonsense-mediated decay // traceable author statement///0006412 // translation // non-traceable author statement///0006412 // translation // traceable author statement///0006413 // translational initiation // traceable author statement///0006414 // translational elongation // traceable author statement///0006415 // translational termination /…	0005622 // intracellular // inferred from electronic annotation///0005739 // mitochondrion // inferred from electronic annotation///0005829 // cytosol // traceable author statement///0005840 // ribosome // inferred from electronic annotation///0015934 // large ribosomal subunit // inferred from electronic annotation///0022625 // cytosolic large ribosomal subunit // inferred from direct assay///00…	0003723 // RNA binding // inferred from electronic annotation///0003735 // structural constituent of ribosome // non-traceable author statement	chr6:35436196-35438558 (+) // 99.86 // p21.31///chr8:48068725-48069422 (+) // 95.71 // q11.1///chr3:61728097-61728795 (-) // 97.86 // p14.2	2013-10-23	This probe set was annotated using the Matching Probes based pipeline to a Entrez Gene identifier using 14 transcripts. // false // Matching Probes // A	AF086557 // gb // 7 // Cross Hyb Matching Probes///GENSCAN00000002548 // ensembl // 2 // Cross Hyb Matching Probes///GENSCAN00000013115 // ensembl // 7 // Cross Hyb Matching Probes///GENSCAN00000018696 // ensembl // 7 // Cross Hyb Matching Probes///GENSCAN00000038520 // ensembl // 2 // Cross Hyb Matching Probes///ENST00000498116 // ensembl // 4 // Cross Hyb Matching Probes///ENST00000465163 // en…	AB082926(11),BC006791(11),BC011366(11),BC013864(11),BC070216(11),BT020040(11),BT020041(11),ENST00000322203(11),ENST00000464112(11),ENST00000467020(11),ENST00000478340(11),ENST00000490335(11),NM_007104(11),U12404(11)	Hs.252574	chr6p21.31	35438558	chr6	99.86	35436196	+	EC:3.6.5.3	ENSG00000198755///ENSG00000226360///OTTHUMG00000014566///OTTHUMG00000157304	ribosomal protein L10a	Human Genome U133 Plus 2.0 Array	February 2009 (Genome Reference Consortium GRCh37)	GO:0000184|GO:0006412|GO:0006412|GO:0006413|GO:0006414|GO:0006415|GO:0006614|GO:0009653|GO:0010467|GO:0016032|GO:0016070|GO:0016071|GO:0019058|GO:0019083|GO:0044267|GO:0005622|GO:0005739|GO:0005829|GO:0005840|GO:0015934|GO:0022625|GO:0030529|GO:0003723|GO:0003735	IPR002143 // Ribosomal protein L1 // 3.6E-55				NP_009035	NM_007104	NM_007104	GenBank
200037_s_at	2784	1850.46	2374.56	2581.57	2489.97	3286.42	0.14019	-0.205989	0	0.3188	0.340165	0.513114	P	P	P	P	P	P	CBX3	11335	0006338 // chromatin remodeling // non-traceable author statement///0006351 // transcription, DNA-dependent // inferred from electronic annotation///0006355 // regulation of transcription, DNA-dependent // inferred from electronic annotation///0016568 // chromatin modification // inferred from electronic annotation///0045892 // negative regulation of transcription, DNA-dependent // inferred from …	0000779 // condensed chromosome, centromeric region // inferred from sequence or structural similarity///0000785 // chromatin // inferred from direct assay///0005634 // nucleus // inferred from direct assay///0005635 // nuclear envelope // inferred from sequence or structural similarity///0005637 // nuclear inner membrane // non-traceable author statement///0005719 // nuclear euchromatin // infer…	0005515 // protein binding // inferred from physical interaction///0019899 // enzyme binding // inferred from physical interaction///0019904 // protein domain specific binding // inferred from physical interaction///0042802 // identical protein binding // inferred from physical interaction	chr7:26241400-26252967 (+) // 95.42 // p15.2	2013-10-23	This probe set was annotated using the Matching Probes based pipeline to a Entrez Gene identifier using 9 transcripts. // false // Matching Probes // A		AB030905(11),AF136630(11),BC000954(11),BX647444(11),ENST00000337620(11),ENST00000396386(11),ENST00000409747(11),NM_007276(11),NM_016587(11)	Hs.278554	chr7p15.2	26252967	chr7	95.42	26241400	+		ENSG00000122565///OTTHUMG00000022911	chromobox homolog 3	Human Genome U133 Plus 2.0 Array	February 2009 (Genome Reference Consortium GRCh37)	GO:0006338|GO:0006351|GO:0006355|GO:0016568|GO:0045892|GO:0045892|GO:0000779|GO:0000785|GO:0005634|GO:0005635|GO:0005637|GO:0005719|GO:0005720|GO:0005819|GO:0031618|GO:0005515|GO:0019899|GO:0019904|GO:0042802	IPR008251 // Chromo shadow domain // 3.3E-36///IPR023780 // Chromo domain // 8.3E-21///IPR023780 // Chromo domain // 2.4E-10		604477	Circadian_Exercise // GenMAPP	NP_009207///NP_057671	NM_007276///NM_016587	NM_016587	GenBank
200038_s_at	9126.12	8858.33	8712.59	9879	8624.51	9559.25	-0.0224099	0.177719	0	0.379473	0.257035	0.178051	P	P	P	P	P	P	RPL17///RPL17-C18orf32///SNORD58A///SNORD58B///SNORD58C	6139///26790///26791///100124516///100526842	0000184 // nuclear-transcribed mRNA catabolic process, nonsense-mediated decay // traceable author statement///0006412 // translation // non-traceable author statement///0006412 // translation // traceable author statement///0006413 // translational initiation // traceable author statement///0006414 // translational elongation // traceable author statement///0006415 // translational termination /…	0005622 // intracellular // inferred from electronic annotation///0005829 // cytosol // traceable author statement///0005840 // ribosome // inferred from electronic annotation///0015934 // large ribosomal subunit // inferred from electronic annotation///0022625 // cytosolic large ribosomal subunit // inferred from direct assay///0030529 // ribonucleoprotein complex // inferred from electronic ann…	0003735 // structural constituent of ribosome // non-traceable author statement	chr18:47014859-47018079 (-) // 93.77 // q21.1	2013-10-23	This probe set was annotated using the Matching Probes based pipeline to a Entrez Gene identifier using 78 transcripts. // true // Matching Probes // A	TCONS_l2_00010599-XLOC_l2_005691 // broad-tucp // 5 // Cross Hyb Matching Probes///TCONS_l2_00010598-XLOC_l2_005691 // broad-tucp // 5 // Cross Hyb Matching Probes///AK311720 // gb // 4 // Cross Hyb Matching Probes///GENSCAN00000001395 // ensembl // 4 // Cross Hyb Matching Probes///GENSCAN00000001933 // ensembl // 2 // Cross Hyb Matching Probes///GENSCAN00000003415 // ensembl // 3 // Cross Hyb Ma…	uc002ldm.2(11),uc021ujt.1(10),uc021ujv.1(11),uc021ujw.1(11),uc021ujx.1(11),uc021ujy.1(11),uc002ldp.3(11),uc021ujz.1(11),uc002ldq.3(11),uc010xdg.2(10),AK304659(10),BC000502(11),BC017831(11),BC066323(11),BC066324(11),BC106031(11),NM_000985(11),NM_001035006(11),NM_001199340(11),NM_001199341(11),NM_001199342(11),NM_001199343(11),NM_001199344(11),NM_001199345(10),NM_001199355(11),NM_001199356(10),GENS…	Hs.82202	chr18q///chr18q21///chr18q21.1	47018079	chr18	93.77	47014859	-		ENSG00000212664///ENSG00000215472///ENSG00000226084///ENSG00000230721///ENSG00000244716///ENSG00000265681///OTTHUMG00000009683///OTTHUMG00000010259///OTTHUMG00000057601///OTTHUMG00000157993///OTTHUMG00000179680///OTTHUMG00000179689	ribosomal protein L17///RPL17-C18orf32 readthrough///small nucleolar RNA, C/D box 58A///small nucleolar RNA, C/D box 58B///small nucleolar RNA, C/D box 58C	Human Genome U133 Plus 2.0 Array	February 2009 (Genome Reference Consortium GRCh37)	GO:0000184|GO:0006412|GO:0006412|GO:0006413|GO:0006414|GO:0006415|GO:0006614|GO:0010467|GO:0016032|GO:0016070|GO:0016071|GO:0019058|GO:0019083|GO:0044267|GO:0005622|GO:0005829|GO:0005840|GO:0015934|GO:0022625|GO:0030529|GO:0003735	IPR001063 // Ribosomal protein L22/L17 // 8.0E-42///IPR001063 // Ribosomal protein L22/L17 // 4.1E-42///IPR001063 // Ribosomal protein L22/L17 // 2.1E-33///IPR001063 // Ribosomal protein L22/L17 // 3.4E-42///IPR001063 // Ribosomal protein L22/L17 // 3.4E-42///IPR001063 // Ribosomal protein L22/L17 // 3.2E-42///IPR001063 // Ribosomal protein L22/L17 // 8.7E-36///IPR001063 // Ribosomal protein L22/…		603661	Ribosomal_Proteins // GenMAPP	NP_000976///NP_001030178///NP_001186269///NP_001186270///NP_001186271///NP_001186272///NP_001186273///NP_001186274///NP_001186284///NP_001186285	NM_000985///NM_001035006///NM_001199340///NM_001199341///NM_001199342///NM_001199343///NM_001199344///NM_001199345///NM_001199355///NM_001199356///NR_002571///NR_002572///NR_003701	NM_000985	GenBank
200039_s_at	1843.51	1905.05	1731.11	2219.25	2376.91	2311.44	0	0.290468	-0.00145006	0.555137	0.727634	0.459902	P	P	P	P	P	P	PSMB2	5690	0000075 // cell cycle checkpoint // traceable author statement///0000082 // G1/S transition of mitotic cell cycle // traceable author statement///0000084 // S phase of mitotic cell cycle // traceable author statement///0000209 // protein polyubiquitination // traceable author statement///0000278 // mitotic cell cycle // traceable author statement///0002474 // antigen processing and presentation o…	0000502 // proteasome complex // traceable author statement///0005634 // nucleus // inferred from direct assay///0005654 // nucleoplasm // traceable author statement///0005730 // nucleolus // inferred from direct assay///0005737 // cytoplasm // inferred from electronic annotation///0005829 // cytosol // traceable author statement///0005839 // proteasome core complex // inferred from sequence or s…	0004175 // endopeptidase activity // inferred from electronic annotation///0004298 // threonine-type endopeptidase activity // inferred from electronic annotation///0005515 // protein binding // inferred from physical interaction///0008233 // peptidase activity // inferred from electronic annotation///0016787 // hydrolase activity // inferred from electronic annotation	chr1:36068740-36107063 (-) // 100.0 // p34.3	2013-10-23	This probe set was annotated using the Matching Probes based pipeline to a Entrez Gene identifier using 12 transcripts. // false // Matching Probes // A	uc001bzd.2 // ucsc_genes // 8 // Cross Hyb Matching Probes///AB209470 // gb // 8 // Cross Hyb Matching Probes	AK296956(11),AK310023(11),BC101836(11),BC105126(11),BC107901(11),BT007137(11),CR456862(11),D26599(11),ENST00000373237(11),NM_001199779(11),NM_001199780(11),NM_002794(11)	Hs.1390	chr1p34.2	36107063	chr1	100	36068740	-	EC:3.4.25.1	ENSG00000126067///OTTHUMG00000004169	proteasome (prosome, macropain) subunit, beta type, 2	Human Genome U133 Plus 2.0 Array	February 2009 (Genome Reference Consortium GRCh37)	GO:0000075|GO:0000082|GO:0000084|GO:0000209|GO:0000278|GO:0002474|GO:0002479|GO:0006508|GO:0006521|GO:0006915|GO:0006977|GO:0010243|GO:0010467|GO:0014070|GO:0016032|GO:0016070|GO:0016071|GO:0019048|GO:0031145|GO:0034641|GO:0042590|GO:0042981|GO:0043066|GO:0044281|GO:0051436|GO:0051437|GO:0051439|GO:0051603|GO:0000502|GO:0005634|GO:0005654|GO:0005730|GO:0005737|GO:0005829|GO:0005839|GO:0004175|GO:…	IPR001353 // Proteasome, subunit alpha/beta // 2.3E-45		602175	Proteasome_Degradation // GenMAPP	NP_001186708///NP_001186709///NP_002785	NM_001199779///NM_001199780///NM_002794	NM_002794	GenBank
200040_at	1615.09	1426.12	1573.08	1713.56	1773.7	1987.59	-0.0512872	0.0122828	0	0.321611	0.44486	0.38168	P	P	P	P	P	P	KHDRBS1	10657	0000086 // G2/M transition of mitotic cell cycle // inferred from sequence or structural similarity///0006351 // transcription, DNA-dependent // inferred from electronic annotation///0006355 // regulation of transcription, DNA-dependent // inferred from electronic annotation///0006397 // mRNA processing // traceable author statement///0007049 // cell cycle // inferred from electronic annotation//…	0005634 // nucleus // inferred from direct assay///0005737 // cytoplasm // inferred from electronic annotation///0016020 // membrane // inferred from direct assay///0070618 // Grb2-Sos complex // inferred from electronic annotation	0003677 // DNA binding // traceable author statement///0003723 // RNA binding // inferred from direct assay///0005070 // SH3/SH2 adaptor activity // inferred from physical interaction///0005515 // protein binding // inferred from physical interaction///0017124 // SH3 domain binding // inferred from electronic annotation///0032403 // protein complex binding // inferred from electronic annotation	chr1:32479490-32509472 (+) // 98.92 // p35.1	2013-10-23	This probe set was annotated using the Matching Probes based pipeline to a Entrez Gene identifier using 7 transcripts. // false // Matching Probes // A		BC010132(11),ENST00000307714(11),ENST00000327300(11),M88108(11),NM_001271878(11),NM_006559(11),NR_073498(11)	Hs.119537	chr1p32	32509472	chr1	98.92	32479490	+		ENSG00000121774///OTTHUMG00000003921	KH domain containing, RNA binding, signal transduction associated 1	Human Genome U133 Plus 2.0 Array	February 2009 (Genome Reference Consortium GRCh37)	GO:0000086|GO:0006351|GO:0006355|GO:0006397|GO:0007049|GO:0007050|GO:0007165|GO:0007166|GO:0008283|GO:0031647|GO:0045892|GO:0045948|GO:0046831|GO:0046833|GO:0005634|GO:0005737|GO:0016020|GO:0070618|GO:0003677|GO:0003723|GO:0005070|GO:0005515|GO:0017124|GO:0032403	IPR004088 // K Homology domain, type 1 // 1.4E-12		602489		NP_001258807///NP_006550	NM_001271878///NM_006559///NR_073498///NR_073499	NM_006559	GenBank
200041_s_at	797.131	798.454	833.442	960.841	1176.19	1150.33	-0.153572	0.0919137	0	0.403427	0.768662	0.509157	P	P	P	P	P	P	ATP6V1G2-DDX39B///DDX39B///SNORD84	7919///692199///100532737	0000245 // spliceosomal complex assembly // inferred from direct assay///0000398 // mRNA splicing, via spliceosome // inferred from genetic interaction///0006397 // mRNA processing // inferred from electronic annotation///0006406 // mRNA export from nucleus // inferred from direct assay///0006406 // mRNA export from nucleus // inferred from genetic interaction///0006810 // transport // inferred f…	0000346 // transcription export complex // inferred from direct assay///0005634 // nucleus // inferred from direct assay///0005681 // spliceosomal complex // inferred from direct assay///0005687 // U4 snRNP // inferred from direct assay///0005688 // U6 snRNP // inferred from direct assay///0005737 // cytoplasm // inferred from direct assay///0016471 // vacuolar proton-transporting V-type ATPase c…	0000166 // nucleotide binding // inferred from electronic annotation///0003676 // nucleic acid binding // inferred from electronic annotation///0003677 // DNA binding // inferred from electronic annotation///0003723 // RNA binding // inferred from electronic annotation///0004004 // ATP-dependent RNA helicase activity // inferred from direct assay///0004386 // helicase activity // inferred from el…	chr6:31498022-31509756 (-) // 98.67 // p21.33	2013-10-23	This probe set was annotated using the Matching Probes based pipeline to a Entrez Gene identifier using 151 transcripts. // true // Matching Probes // A	GENSCAN00000027463 // ensembl // 2 // Cross Hyb Matching Probes///ENST00000463430 // ensembl // 5 // Cross Hyb Matching Probes///ENST00000460622 // ensembl // 2 // Cross Hyb Matching Probes///ENST00000470514 // ensembl // 5 // Cross Hyb Matching Probes///ENST00000460280 // ensembl // 2 // Cross Hyb Matching Probes///ENST00000549374 // ensembl // 4 // Cross Hyb Matching Probes///ENST00000472906 //…	uc003ntr.3(11),uc003ntt.3(11),uc003ntu.3(11),uc011dnn.2(11),uc003ntv.3(11),uc011eml.2(11),uc011emm.2(11),uc011fde.2(11),uc011fdh.2(11),uc011fdi.2(11),uc011fdg.2(11),uc011fdj.2(11),uc011gbb.2(11),uc011gbe.2(11),uc011gbf.2(11),uc011gbd.2(11),uc011gbg.2(11),uc011gxk.2(11),uc011gxn.2(11),uc011gxo.2(11),uc011gxm.2(11),uc011gxp.2(11),uc011hqa.2(11),uc011hqd.2(11),uc011hqe.2(11),uc011hqc.2(11),uc011hqf.…	Hs.55296	chr6p///chr6p21.3///chr6p21.33	31509756	chr6	98.67	31498022	-	EC:3.6.4.13	ENSG00000198563///ENSG00000215425///ENSG00000225073///ENSG00000225859///ENSG00000229496///ENSG00000230624///ENSG00000235439///ENSG00000237889///ENSG00000254870///ENSG00000254899///OTTHUMG00000031165///OTTHUMG00000031200///OTTHUMG00000031447///OTTHUMG00000037459///OTTHUMG00000148789///OTTHUMG00000149014///OTTHUMG00000149295///OTTHUMG00000149528///OTTHUMG00000149942///OTTHUMG00000166665	ATP6V1G2-DDX39B readthrough (NMD candidate)///DEAD (Asp-Glu-Ala-Asp) box polypeptide 39B///small nucleolar RNA, C/D box 84	Human Genome U133 Plus 2.0 Array	February 2009 (Genome Reference Consortium GRCh37)	GO:0000245|GO:0000398|GO:0006397|GO:0006406|GO:0006406|GO:0006810|GO:0008380|GO:0010501|GO:0015992|GO:0046784|GO:0051028|GO:0000346|GO:0005634|GO:0005681|GO:0005687|GO:0005688|GO:0005737|GO:0016471|GO:0016607|GO:0000166|GO:0003676|GO:0003677|GO:0003723|GO:0004004|GO:0004386|GO:0005515|GO:0005524|GO:0008026|GO:0008186|GO:0016787|GO:0016820|GO:0017070|GO:0030621|GO:0043008	IPR001650 // Helicase, C-terminal // 1.8E-20///IPR001650 // Helicase, C-terminal // 1.1E-24///IPR001650 // Helicase, C-terminal // 7.4E-26///IPR001650 // Helicase, C-terminal // 7.4E-25///IPR001650 // Helicase, C-terminal // 4.5E-25///IPR001650 // Helicase, C-terminal // 7.8E-21///IPR001650 // Helicase, C-terminal // 3.9E-23///IPR001650 // Helicase, C-terminal // 5.1E-25///IPR005124 // Vacuolar (…		142560		NP_004631///NP_542165	NM_004640///NM_080598///NR_003065///NR_037852///NR_037853	NM_004640	GenBank
200042_at	761.993	702.298	639.188	730.878	831.873	788.646	0	0.125401	-0.16423	0.227372	0.487588	0.183166	P	P	P	P	P	P	RTCB	51493	0001701 // in utero embryonic development // inferred from electronic annotation///0001890 // placenta development // inferred from electronic annotation///0006388 // tRNA splicing, via endonucleolytic cleavage and ligation // inferred from direct assay///0006396 // RNA processing // inferred from electronic annotation///0007160 // cell-matrix adhesion // non-traceable author statement///0008033 …	0005737 // cytoplasm // inferred from electronic annotation///0072669 // tRNA-splicing ligase complex // inferred from direct assay	0000166 // nucleotide binding // inferred from electronic annotation///0003972 // RNA ligase (ATP) activity // inferred from direct assay///0005524 // ATP binding // inferred from electronic annotation///0008452 // RNA ligase activity // inferred from electronic annotation///0016874 // ligase activity // inferred from electronic annotation///0017166 // vinculin binding // inferred from physical i…	chr22:32783566-32808218 (-) // 100.0 // q12.3	2013-10-23	This probe set was annotated using the Matching Probes based pipeline to a Entrez Gene identifier using 9 transcripts. // false // Matching Probes // A	AK297826 // gb // 8 // Cross Hyb Matching Probes///AK297908 // gb // 7 // Cross Hyb Matching Probes///CR456450 // gb // 7 // Cross Hyb Matching Probes///GENSCAN00000012703 // ensembl // 5 // Cross Hyb Matching Probes	AF155658(11),AF161466(11),BC000151(11),BC002970(11),BC010308(11),BC016707(11),ENST00000216038(11),ENST00000451746(11),NM_014306(11)	Hs.10729	chr22q12	32808218	chr22	100	32783566	-	EC:6.5.1.3	ENSG00000100220///OTTHUMG00000030300	RNA 2',3'-cyclic phosphate and 5'-OH ligase	Human Genome U133 Plus 2.0 Array	February 2009 (Genome Reference Consortium GRCh37)	GO:0001701|GO:0001890|GO:0006388|GO:0006396|GO:0007160|GO:0008033|GO:0034446|GO:0005737|GO:0072669|GO:0000166|GO:0003972|GO:0005524|GO:0008452|GO:0016874|GO:0017166|GO:0046872	IPR001233 // RtcB family // 1.0E-148///IPR001233 // RtcB family // 1.1E-32		613901		NP_055121	NM_014306	NM_014306	GenBank
200043_at	3379.37	3082.6	3082.01	4100.91	3712.16	4754.61	0	0.110489	-0.0435739	0.566708	0.496509	0.626138	P	P	P	P	P	P	ERH	2079	0006139 // nucleobase-containing compound metabolic process // traceable author statement///0006213 // pyrimidine nucleoside metabolic process // traceable author statement///0007049 // cell cycle // inferred from electronic annotation	0030496 // midbody // inferred from direct assay		chr14:69846845-69865021 (-) // 97.55 // q24.1	2013-10-23	This probe set was annotated using the Matching Probes based pipeline to a Entrez Gene identifier using 7 transcripts. // false // Matching Probes // A	BT006877 // gb // 7 // Cross Hyb Matching Probes///CR450298 // gb // 7 // Cross Hyb Matching Probes///CR542178 // gb // 7 // Cross Hyb Matching Probes///GENSCAN00000038492 // ensembl // 7 // Cross Hyb Matching Probes///ENST00000557697 // ensembl // 2 // Cross Hyb Matching Probes///ENST00000555373 // ensembl // 2 // Cross Hyb Matching Probes///ENST00000523006 // ensembl // 3 // Cross Hyb Matching …	BC014301(11),BC071709(11),D85758(11),ENST00000216520(11),ENST00000557016(11),NM_004450(11),U66871(11)	Hs.118757	chr14q24.1|7q34	69865021	chr14	97.55	69846845	-		ENSG00000100632///OTTHUMG00000171323	enhancer of rudimentary homolog (Drosophila)	Human Genome U133 Plus 2.0 Array	February 2009 (Genome Reference Consortium GRCh37)	GO:0006139|GO:0006213|GO:0007049|GO:0030496	IPR000781 // Enhancer of rudimentary // 1.7E-56		601191		NP_004441	NM_004450	NM_004450	GenBank
200044_at	2359.31	1771.8	2044.98	2119.2	2257.11	2383.05	0.116969	-0.0530906	0	0.249644	0.41408	0.264976	P	P	P	P	P	P	GATC///SRSF9	8683///283459	0000398 // mRNA splicing, via spliceosome // traceable author statement///0006366 // transcription from RNA polymerase II promoter // traceable author statement///0006369 // termination of RNA polymerase II transcription // traceable author statement///0006376 // mRNA splice site selection // traceable author statement///0006397 // mRNA processing // traceable author statement///0006406 // mRNA e…	0005634 // nucleus // inferred from direct assay///0005654 // nucleoplasm // traceable author statement///0005730 // nucleolus // inferred from direct assay///0005739 // mitochondrion // inferred from direct assay///0030956 // glutamyl-tRNA(Gln) amidotransferase complex // inferred from direct assay	0000166 // nucleotide binding // inferred from electronic annotation///0003676 // nucleic acid binding // inferred from electronic annotation///0003723 // RNA binding // inferred from electronic annotation///0005515 // protein binding // inferred from physical interaction///0005524 // ATP binding // inferred from electronic annotation///0016874 // ligase activity // inferred from electronic annot…	chr12:120899470-120907464 (-) // 88.31 // q24.31	2013-10-23	This probe set was annotated using the Matching Probes based pipeline to a Entrez Gene identifier using 6 transcripts. // true // Matching Probes // A	AK290644 // gb // 8 // Cross Hyb Matching Probes///BC093971 // gb // 8 // Cross Hyb Matching Probes///BC093973 // gb // 8 // Cross Hyb Matching Probes///GENSCAN00000035677 // ensembl // 6 // Cross Hyb Matching Probes///ENST00000548326 // ensembl // 7 // Cross Hyb Matching Probes///ENST00000550458 // ensembl // 2 // Cross Hyb Matching Probes///OTTHUMT00000403675 // vega // 7 // Cross Hyb Matching …	uc001tyi.3(11),U30825(11),NM_003769(11),ENST00000229390(11),ENST00000548792(10),OTTHUMT00000108983(11),OTTHUMT00000403676(10),OTTHUMT00000469703(10)	Hs.77608	chr12q24.31	120907464	chr12	88.31	120899470	-	EC:6.3.5.-	ENSG00000111786///OTTHUMG00000047790	glutamyl-tRNA(Gln) amidotransferase, subunit C///serine/arginine-rich splicing factor 9	Human Genome U133 Plus 2.0 Array	February 2009 (Genome Reference Consortium GRCh37)	GO:0000398|GO:0006366|GO:0006369|GO:0006376|GO:0006397|GO:0006406|GO:0006412|GO:0006450|GO:0008380|GO:0010467|GO:0031124|GO:0032543|GO:0048025|GO:0070681|GO:0005634|GO:0005654|GO:0005730|GO:0005739|GO:0030956|GO:0000166|GO:0003676|GO:0003723|GO:0005515|GO:0005524|GO:0016874|GO:0050567	IPR000504 // RNA recognition motif domain // 2.0E-22///IPR000504 // RNA recognition motif domain // 1.1E-15		601943	mRNA_processing_Reactome // GenMAPP	NP_003760///NP_789788	NM_003769///NM_176818///NR_033684	NM_003769	GenBank
200045_at	464.315	417.006	399.164	377.723	485.524	440.761	0	0.0880585	-0.128815	-0.0102563	0.425441	0.0584559	P	P	P	P	P	P	ABCF1	23	0006200 // ATP catabolic process // inferred from electronic annotation///0006412 // translation // traceable author statement///0006413 // translational initiation // inferred from mutant phenotype///0006954 // inflammatory response // traceable author statement///0042254 // ribosome biogenesis // inferred from direct assay///0045727 // positive regulation of translation // inferred from direct …	0005634 // nucleus // inferred from electronic annotation///0005635 // nuclear envelope // inferred from direct assay///0005635 // nuclear envelope // inferred from electronic annotation///0005654 // nucleoplasm // inferred from direct assay///0005654 // nucleoplasm // inferred from electronic annotation///0005737 // cytoplasm // inferred from direct assay///0005840 // ribosome // inferred from e…	0000166 // nucleotide binding // inferred from electronic annotation///0005515 // protein binding // inferred from physical interaction///0005524 // ATP binding // inferred from direct assay///0005524 // ATP binding // inferred from electronic annotation///0008135 // translation factor activity, nucleic acid binding // traceable author statement///0008494 // translation activator activity // infe…	chr6:30539176-30559088 (+) // 98.44 // p21.33	2013-10-23	This probe set was annotated using the Matching Probes based pipeline to a Entrez Gene identifier using 37 transcripts. // false // Matching Probes // A		AB209564(11),AF027302(11),AK298061(10),BC034488(11),BC112923(11),ENST00000326195(11),ENST00000376545(11),ENST00000383587(11),ENST00000383588(11),ENST00000396515(11),ENST00000400609(11),ENST00000412443(11),ENST00000416932(11),ENST00000419893(11),ENST00000420257(11),ENST00000421042(11),ENST00000421608(11),ENST00000423247(11),ENST00000426219(11),ENST00000448939(11),ENST00000452530(11),ENST0000045409…	Hs.9573	chr6p21.33	30559088	chr6	98.44	30539176	+		ENSG00000204574///ENSG00000206490///ENSG00000225989///ENSG00000231129///ENSG00000232169///ENSG00000236149///ENSG00000236342///OTTHUMG00000004922///OTTHUMG00000031094///OTTHUMG00000031364///OTTHUMG00000133029///OTTHUMG00000149028///OTTHUMG00000149310///OTTHUMG00000149541	ATP-binding cassette, sub-family F (GCN20), member 1	Human Genome U133 Plus 2.0 Array	February 2009 (Genome Reference Consortium GRCh37)	GO:0006200|GO:0006412|GO:0006413|GO:0006954|GO:0042254|GO:0045727|GO:0005634|GO:0005635|GO:0005635|GO:0005654|GO:0005654|GO:0005737|GO:0005840|GO:0042788|GO:0000166|GO:0005515|GO:0005524|GO:0005524|GO:0008135|GO:0008494|GO:0016887|GO:0017111|GO:0043022	IPR003439 // ABC transporter-like // 1.1E-15///IPR003439 // ABC transporter-like // 1.9E-19///IPR003439 // ABC transporter-like // 3.9E-18///IPR003439 // ABC transporter-like // 1.4E-19///IPR003439 // ABC transporter-like // 5.9E-16///IPR003439 // ABC transporter-like // 7.2E-16///IPR003439 // ABC transporter-like // 2.0E-19///IPR003439 // ABC transporter-like // 1.2E-19		603429		NP_001020262///NP_001081	NM_001025091///NM_001090	NM_001090	GenBank
200046_at	3306.74	3087.05	3244.8	3918.58	3400.67	3422.93	-0.0620284	0.0818849	0	0.470412	0.339384	0.12136	P	P	P	P	P	P	DAD1	1603	0001824 // blastocyst development // inferred from electronic annotation///0006486 // protein glycosylation // inferred from sequence or structural similarity///0006915 // apoptotic process // inferred from electronic annotation///0007584 // response to nutrient // inferred from electronic annotation///0018279 // protein N-linked glycosylation via asparagine // inferred by curator///0018279 // pr…	0005783 // endoplasmic reticulum // inferred from electronic annotation///0005789 // endoplasmic reticulum membrane // traceable author statement///0008250 // oligosaccharyltransferase complex // inferred from sequence or structural similarity///0008250 // oligosaccharyltransferase complex // traceable author statement///0016020 // membrane // inferred from electronic annotation///0016021 // inte…	0004576 // oligosaccharyl transferase activity // inferred from sequence or structural similarity///0004579 // dolichyl-diphosphooligosaccharide-protein glycotransferase activity // inferred by curator///0016740 // transferase activity // inferred from electronic annotation///0016757 // transferase activity, transferring glycosyl groups // inferred from electronic annotation	chr14:23033806-23058129 (-) // 97.28 // q11.2	2013-10-23	This probe set was annotated using the Matching Probes based pipeline to a Entrez Gene identifier using 10 transcripts. // false // Matching Probes // A	BC038575 // gb // 8 // Cross Hyb Matching Probes///ENST00000489532 // ensembl // 3 // Cross Hyb Matching Probes///OTTHUMT00000071620 // vega // 3 // Cross Hyb Matching Probes	BC007403(11),BC009798(11),CR407682(10),CR542204(10),D15057(11),ENST00000250498(11),ENST00000535847(10),ENST00000538631(9),ENST00000543337(9),NM_001344(11)	Hs.82890	chr14q11.2	23058129	chr14	97.28	23033806	-	EC:2.4.1.119///EC:2.4.99.18	ENSG00000129562///OTTHUMG00000028685	defender against cell death 1	Human Genome U133 Plus 2.0 Array	February 2009 (Genome Reference Consortium GRCh37)	GO:0001824|GO:0006486|GO:0006915|GO:0007584|GO:0018279|GO:0018279|GO:0042493|GO:0043066|GO:0043687|GO:0044267|GO:0005783|GO:0005789|GO:0008250|GO:0008250|GO:0016020|GO:0016021|GO:0004576|GO:0004579|GO:0016740|GO:0016757	IPR003038 // DAD/Ost2 // 6.9E-56///IPR003038 // DAD/Ost2 // 9.7E-13///IPR003038 // DAD/Ost2 // 1.0E-33///IPR003038 // DAD/Ost2 // 5.4E-14///IPR003038 // DAD/Ost2 // 3.3E-20		600243		NP_001335	NM_001344	NM_001344	GenBank
200047_s_at	1823.51	1432.19	1706.91	1543.46	1437.72	1789.43	0.00602579	-0.0993724	0	0.0529919	0.0240893	0.112371	P	P	P	P	P	P	YY1	7528	0000122 // negative regulation of transcription from RNA polymerase II promoter // inferred from direct assay///0000724 // double-strand break repair via homologous recombination // inferred from mutant phenotype///0006281 // DNA repair // inferred from electronic annotation///0006310 // DNA recombination // inferred from electronic annotation///0006351 // transcription, DNA-dependent // inferred…	0005622 // intracellular // inferred from electronic annotation///0005634 // nucleus // inferred from direct assay///0005667 // transcription factor complex // inferred from electronic annotation///0005886 // plasma membrane // inferred from direct assay///0016363 // nuclear matrix // inferred from electronic annotation///0031011 // Ino80 complex // inferred from direct assay///0031519 // PcG pro…	0000400 // four-way junction DNA binding // inferred from direct assay///0001078 // RNA polymerase II core promoter proximal region sequence-specific DNA binding transcription factor activity involved in negative regulation of transcription // inferred from sequence or structural similarity///0003676 // nucleic acid binding // inferred from electronic annotation///0003677 // DNA binding // inferr…	chr14:100705101-100744804 (+) // 81.02 // q32.2	2013-10-23	This probe set was annotated using the Matching Probes based pipeline to a Entrez Gene identifier using 6 transcripts. // false // Matching Probes // A	uc021vqc.1 // ucsc_genes // 4 // Cross Hyb Matching Probes///uc011mjp.2 // ucsc_genes // 2 // Cross Hyb Matching Probes///n333016 // noncode // 4 // Cross Hyb Matching Probes///n409305 // noncode // 4 // Cross Hyb Matching Probes///AF147416 // gb // 4 // Cross Hyb Matching Probes///BC042175 // gb // 4 // Cross Hyb Matching Probes///NM_206923 // refseq // 2 // Cross Hyb Matching Probes///NR_033658…	BC037308(11),ENST00000262238(11),ENST00000555735(11),M76541(11),M77698(11),NM_003403(11)	Hs.97496	chr14q	100744804	chr14	81.02	100705101	+		ENSG00000100811///OTTHUMG00000150479	YY1 transcription factor	Human Genome U133 Plus 2.0 Array	February 2009 (Genome Reference Consortium GRCh37)	GO:0000122|GO:0000724|GO:0006281|GO:0006310|GO:0006351|GO:0006355|GO:0006357|GO:0006403|GO:0006974|GO:0007283|GO:0009952|GO:0010225|GO:0030154|GO:0034644|GO:0034696|GO:0048593|GO:0051276|GO:0005622|GO:0005634|GO:0005667|GO:0005886|GO:0016363|GO:0031011|GO:0031519|GO:0000400|GO:0001078|GO:0003676|GO:0003677|GO:0003700|GO:0003713|GO:0003714|GO:0003723|GO:0005515|GO:0008270|GO:0044212|GO:0046872	IPR007087 // Zinc finger, C2H2 // 1.0E-8		600013		NP_003394	NM_003403	NM_003403	GenBank
200048_s_at	2158.34	1805.88	2108.79	2184.78	1811.59	2325.93	0	-0.0141249	0.0558038	0.30509	0.108337	0.241453	P	P	P	P	P	P	JTB	10899	0000910 // cytokinesis // inferred from mutant phenotype///0006915 // apoptotic process // inferred from electronic annotation///0007049 // cell cycle // inferred from electronic annotation///0007067 // mitosis // inferred from mutant phenotype///0042127 // regulation of cell proliferation // inferred from electronic annotation///0043066 // negative regulation of apoptotic process // inferred fro…	0005737 // cytoplasm // inferred from direct assay///0005739 // mitochondrion // inferred from electronic annotation///0005813 // centrosome // inferred from direct assay///0005815 // microtubule organizing center // inferred from electronic annotation///0005819 // spindle // inferred from direct assay///0005856 // cytoskeleton // inferred from electronic annotation///0005887 // integral to plasm…	0019901 // protein kinase binding // inferred from direct assay	chr1:153946987-153950160 (-) // 100.0 // q21.3	2013-10-23	This probe set was annotated using the Matching Probes based pipeline to a Entrez Gene identifier using 17 transcripts. // false // Matching Probes // A	ENST00000461365 // ensembl // 7 // Cross Hyb Matching Probes///ENST00000471173 // ensembl // 5 // Cross Hyb Matching Probes///OTTHUMT00000090420 // vega // 7 // Cross Hyb Matching Probes///OTTHUMT00000090421 // vega // 5 // Cross Hyb Matching Probes	AB016488(11),AF115850(11),AF131797(11),AF151056(11),BC000499(11),BC000996(11),BC001363(11),BC001667(11),BC004239(11),BC019277(11),BT007285(10),CR456985(10),ENST00000271843(11),ENST00000356648(11),ENST00000368589(11),ENST00000428469(10),NM_006694(11)	Hs.6396	chr1q21	153950160	chr1	100	153946987	-		ENSG00000143543///OTTHUMG00000036590	jumping translocation breakpoint	Human Genome U133 Plus 2.0 Array	February 2009 (Genome Reference Consortium GRCh37)	GO:0000910|GO:0006915|GO:0007049|GO:0007067|GO:0042127|GO:0043066|GO:0045860|GO:0051301|GO:0005737|GO:0005739|GO:0005813|GO:0005815|GO:0005819|GO:0005856|GO:0005887|GO:0016020|GO:0016021|GO:0030496|GO:0019901	IPR008657 // Jumping translocation breakpoint // 1.8E-58///IPR008657 // Jumping translocation breakpoint // 1.2E-54		604671		NP_006685	NM_006694	NM_006694	GenBank
200049_at	240.308	192.59	217.372	286.563	245.776	232.457	0.055408	-0.0208464	0	0.596899	0.448872	0.141057	P	P	P	P	P	P	KAT7	11143	0006260 // DNA replication // inferred from direct assay///0006351 // transcription, DNA-dependent // inferred from electronic annotation///0006355 // regulation of transcription, DNA-dependent // traceable author statement///0016568 // chromatin modification // inferred from electronic annotation///0043966 // histone H3 acetylation // inferred from direct assay///0043981 // histone H4-K5 acetyla…	0000123 // histone acetyltransferase complex // inferred from direct assay///0005622 // intracellular // inferred from electronic annotation///0005634 // nucleus // inferred from electronic annotation///0005654 // nucleoplasm // inferred from direct assay///0005730 // nucleolus // inferred from direct assay	0003700 // sequence-specific DNA binding transcription factor activity // inferred from electronic annotation///0004402 // histone acetyltransferase activity // inferred from electronic annotation///0005515 // protein binding // inferred from physical interaction///0008270 // zinc ion binding // inferred from electronic annotation///0016740 // transferase activity // inferred from electronic anno…	chr17:47866154-47906456 (+) // 98.97 // q21.33	2013-10-23	This probe set was annotated using the Matching Probes based pipeline to a Entrez Gene identifier using 14 transcripts. // false // Matching Probes // A		AF074606(11),AF140360(11),AF217502(11),AK122932(11),BC032640(11),ENST00000259021(11),ENST00000424009(11),ENST00000435742(11),ENST00000503935(11),NM_001199155(11),NM_001199156(11),NM_001199157(11),NM_001199158(11),NM_007067(11)	Hs.21907	chr17q21.32	47906456	chr17	98.97	47866154	+	EC:2.3.1.48	ENSG00000136504///OTTHUMG00000161770	K(lysine) acetyltransferase 7	Human Genome U133 Plus 2.0 Array	February 2009 (Genome Reference Consortium GRCh37)	GO:0006260|GO:0006351|GO:0006355|GO:0016568|GO:0043966|GO:0043981|GO:0043982|GO:0043983|GO:0043984|GO:0000123|GO:0005622|GO:0005634|GO:0005654|GO:0005730|GO:0003700|GO:0004402|GO:0005515|GO:0008270|GO:0016740|GO:0016746|GO:0016747|GO:0046872	IPR002515 // Zinc finger, C2HC-type // 2.4E-18///IPR002515 // Zinc finger, C2HC-type // 2.2E-18///IPR002515 // Zinc finger, C2HC-type // 1.5E-18///IPR002515 // Zinc finger, C2HC-type // 1.7E-18///IPR002717 // MOZ/SAS-like protein // 6.0E-93///IPR002717 // MOZ/SAS-like protein // 5.4E-93///IPR002717 // MOZ/SAS-like protein // 2.7E-93///IPR002717 // MOZ/SAS-like protein // 3.2E-93		609880		NP_001186084///NP_001186085///NP_001186086///NP_001186087///NP_008998	NM_001199155///NM_001199156///NM_001199157///NM_001199158///NM_007067	NM_007067	GenBank
200050_at	812.998	600.435	661.995	724.614	863.293	977.025	0.194149	0	-0.0129743	0.315629	0.64175	0.592858	P	P	P	P	P	P	ZNF146	7705	0006355 // regulation of transcription, DNA-dependent // traceable author statement	0005622 // intracellular // inferred from electronic annotation///0005634 // nucleus // traceable author statement///0005730 // nucleolus // inferred from direct assay///0005737 // cytoplasm // inferred from direct assay	0003676 // nucleic acid binding // inferred from electronic annotation///0003677 // DNA binding // inferred from electronic annotation///0008201 // heparin binding // traceable author statement///0008270 // zinc ion binding // inferred from electronic annotation///0046872 // metal ion binding // inferred from electronic annotation	chr19:36719647-36729666 (+) // 69.93 // q13.12	2013-10-23	This probe set was annotated using the Matching Probes based pipeline to a Entrez Gene identifier using 7 transcripts. // false // Matching Probes // A		BC110500(9),BC110501(9),ENST00000443387(11),ENST00000456324(11),NM_001099638(11),NM_001099639(11),NM_007145(11)	Hs.301819	chr19q13.1	36729666	chr19	69.93	36719647	+		ENSG00000167635///OTTHUMG00000180511	zinc finger protein 146	Human Genome U133 Plus 2.0 Array	February 2009 (Genome Reference Consortium GRCh37)	GO:0006355|GO:0005622|GO:0005634|GO:0005730|GO:0005737|GO:0003676|GO:0003677|GO:0008201|GO:0008270|GO:0046872	IPR007087 // Zinc finger, C2H2 // 8.2E-8///IPR007087 // Zinc finger, C2H2 // 5.3E-8///IPR007087 // Zinc finger, C2H2 // 2.2E-10///IPR007087 // Zinc finger, C2H2 // 1.2E-10///IPR007087 // Zinc finger, C2H2 // 6.3E-9///IPR007087 // Zinc finger, C2H2 // 1.6E-8///IPR007087 // Zinc finger, C2H2 // 1.5E-9///IPR007087 // Zinc finger, C2H2 // 1.4E-7		601505		NP_001093108///NP_001093109///NP_009076	NM_001099638///NM_001099639///NM_007145	NM_007145	GenBank
200051_at	209.299	171.804	163.66	226.825	155.069	157.997	0.0417085	0	-0.223848	0.445242	-0.0299439	-0.2304	P	P	P	P	P	P	SART1	9092	0000387 // spliceosomal snRNP assembly // traceable author statement///0000398 // mRNA splicing, via spliceosome // inferred by curator///0006397 // mRNA processing // inferred from electronic annotation///0007050 // cell cycle arrest // non-traceable author statement///0008380 // RNA splicing // inferred from electronic annotation///0045585 // positive regulation of cytotoxic T cell differentiat…	0005634 // nucleus // inferred from direct assay///0005654 // nucleoplasm // inferred from direct assay///0005681 // spliceosomal complex // inferred from electronic annotation///0005730 // nucleolus // inferred from direct assay///0005737 // cytoplasm // traceable author statement///0005794 // Golgi apparatus // inferred from direct assay///0005829 // cytosol // traceable author statement///0015…	0005515 // protein binding // inferred from physical interaction	chr11:65729213-65746565 (+) // 91.3 // q13.1	2013-10-23	This probe set was annotated using the Matching Probes based pipeline to a Entrez Gene identifier using 10 transcripts. // false // Matching Probes // A	AK298184 // gb // 8 // Cross Hyb Matching Probes///ENST00000533386 // ensembl // 8 // Cross Hyb Matching Probes///ENST00000529580 // ensembl // 8 // Cross Hyb Matching Probes///OTTHUMT00000391415 // vega // 8 // Cross Hyb Matching Probes///OTTHUMT00000391416 // vega // 8 // Cross Hyb Matching Probes///OTTHUMT00000391417 // vega // 8 // Cross Hyb Matching Probes///AF119856 // gb // 9 // Negative S…	AB006198(11),AF353625(11),AK293200(11),BC001058(11),BT006637(11),BX648500(11),ENST00000312397(11),ENST00000528137(9),NM_005146(11),Y14314(11)	Hs.288319	chr11q13.1	65746565	chr11	91.3	65729213	+		ENSG00000175467///OTTHUMG00000166771	squamous cell carcinoma antigen recognized by T cells	Human Genome U133 Plus 2.0 Array	February 2009 (Genome Reference Consortium GRCh37)	GO:0000387|GO:0000398|GO:0006397|GO:0007050|GO:0008380|GO:0045585|GO:0097193|GO:0005634|GO:0005654|GO:0005681|GO:0005730|GO:0005737|GO:0005794|GO:0005829|GO:0015030|GO:0071013|GO:0005515	IPR005011 // SART-1 protein // 5.3E-174		605941		NP_005137	NM_005146	NM_005146	GenBank
200052_s_at	1690.39	1334.93	1258.83	1672.58	1740.61	2060.7	0.0975018	0	-0.238461	0.369742	0.500738	0.516848	P	P	P	P	P	P	ILF2	3608	0006351 // transcription, DNA-dependent // inferred from direct assay///0006355 // regulation of transcription, DNA-dependent // inferred from electronic annotation///0006955 // immune response // inferred from electronic annotation///0045893 // positive regulation of transcription, DNA-dependent // inferred from direct assay	0005634 // nucleus // inferred from direct assay///0005730 // nucleolus // inferred from direct assay///0005737 // cytoplasm // inferred from electronic annotation///0030529 // ribonucleoprotein complex // inferred from direct assay	0003677 // DNA binding // inferred from direct assay///0003723 // RNA binding // inferred from electronic annotation///0003725 // double-stranded RNA binding // inferred from direct assay///0005515 // protein binding // inferred from physical interaction///0005524 // ATP binding // inferred from electronic annotation///0016740 // transferase activity // inferred from electronic annotation	chr1:153634520-153643437 (-) // 95.62 // q21.3	2013-10-23	This probe set was annotated using the Matching Probes based pipeline to a Entrez Gene identifier using 9 transcripts. // false // Matching Probes // A	ENST00000547482 // ensembl // 5 // Cross Hyb Matching Probes///ENST00000486302 // ensembl // 7 // Cross Hyb Matching Probes///OTTHUMT00000409617 // vega // 5 // Cross Hyb Matching Probes///OTTHUMT00000351967 // vega // 7 // Cross Hyb Matching Probes	AK302214(11),BC000382(11),ENST00000361891(11),ENST00000480213(11),HQ322261(10),HQ322262(10),NM_001267809(11),NM_004515(11),U10323(11)	Hs.75117	chr1q21.3	153643437	chr1	95.62	153634520	-		ENSG00000143621///OTTHUMG00000037087	interleukin enhancer binding factor 2	Human Genome U133 Plus 2.0 Array	February 2009 (Genome Reference Consortium GRCh37)	GO:0006351|GO:0006355|GO:0006955|GO:0045893|GO:0005634|GO:0005730|GO:0005737|GO:0030529|GO:0003677|GO:0003723|GO:0003725|GO:0005515|GO:0005524|GO:0016740	IPR006561 // DZF // 8.0E-94		603181		NP_001254738///NP_004506	NM_001267809///NM_004515	NM_004515	GenBank
200053_at	690.688	748.113	559.229	539.952	547.336	923.404	0	0.358315	-0.215288	-0.0676846	0.0253944	0.552493	P	P	P	P	P	P	SPAG7	9552		0005634 // nucleus // inferred from electronic annotation	0003676 // nucleic acid binding // inferred from electronic annotation	chr17:4862522-4871108 (-) // 97.18 // p13.2	2013-10-23	This probe set was annotated using the Matching Probes based pipeline to a Entrez Gene identifier using 8 transcripts. // false // Matching Probes // A	GENSCAN00000039579 // ensembl // 8 // Cross Hyb Matching Probes///ENST00000575784 // ensembl // 8 // Cross Hyb Matching Probes///OTTHUMT00000438749 // vega // 8 // Cross Hyb Matching Probes	AF047437(11),AK123065(11),BC007819(11),BC011934(11),ENST00000206020(11),ENST00000573366(11),ENST00000575142(11),NM_004890(11)	Hs.90436	chr17p13.2	4871108	chr17	97.18	4862522	-		ENSG00000091640///OTTHUMG00000177733	sperm associated antigen 7	Human Genome U133 Plus 2.0 Array	February 2009 (Genome Reference Consortium GRCh37)	GO:0005634|GO:0003676	IPR001374 // Single-stranded nucleic acid binding R3H // 4.4E-19///IPR001374 // Single-stranded nucleic acid binding R3H // 5.9E-19///IPR001374 // Single-stranded nucleic acid binding R3H // 3.7E-19		610056		NP_004881	NM_004890	NM_004890	GenBank
200054_at	396.053	281.935	314.276	336.673	319.102	352.744	0.244353	-0.00288057	0	0.297526	0.29368	0.210849	P	P	P	P	P	P	ZNF259	8882	0007165 // signal transduction // traceable author statement///0008283 // cell proliferation // traceable author statement	0005634 // nucleus // traceable author statement///0005730 // nucleolus // inferred from electronic annotation///0005737 // cytoplasm // inferred from electronic annotation	0005515 // protein binding // inferred from electronic annotation///0008270 // zinc ion binding // inferred from electronic annotation///0046872 // metal ion binding // inferred from electronic annotation	chr11:116649276-116658726 (-) // 94.06 // q23.3	2013-10-23	This probe set was annotated using the Matching Probes based pipeline to a Entrez Gene identifier using 10 transcripts. // false // Matching Probes // A	CR627448 // gb // 3 // Cross Hyb Matching Probes///AK301227 // gb // 6 // Cross Hyb Matching Probes///BT006642 // gb // 2 // Cross Hyb Matching Probes///GENSCAN00000022179 // ensembl // 2 // Cross Hyb Matching Probes///ENST00000572422 // ensembl // 3 // Cross Hyb Matching Probes///OTTHUMT00000436273 // vega // 3 // Cross Hyb Matching Probes	AF019767(11),BC004256(9),BC012162(9),BC017349(9),BC017380(9),BC111028(9),ENST00000227322(11),ENST00000429220(11),ENST00000444935(11),NM_003904(9)	Hs.7165	chr11q23.3	116658726	chr11	94.06	116649276	-		ENSG00000109917///OTTHUMG00000046114	zinc finger protein 259	Human Genome U133 Plus 2.0 Array	February 2009 (Genome Reference Consortium GRCh37)	GO:0007165|GO:0008283|GO:0005634|GO:0005730|GO:0005737|GO:0005515|GO:0008270|GO:0046872	IPR004457 // Zinc finger, ZPR1-type // 1.5E-35///IPR004457 // Zinc finger, ZPR1-type // 1.0E-62///IPR004457 // Zinc finger, ZPR1-type // 1.3E-66///IPR004457 // Zinc finger, ZPR1-type // 1.6E-47///IPR004457 // Zinc finger, ZPR1-type // 1.5E-66///IPR004457 // Zinc finger, ZPR1-type // 1.5E-62		603901		NP_003895	NM_003904	NM_003904	GenBank
200055_at	1205.79	949.114	1082.02	805.199	594.809	795.658	0.0669341	-0.0352922	0	-0.228105	-0.591538	-0.399255	P	P	P	P	P	P	TAF10	6881	0006351 // transcription, DNA-dependent // inferred from electronic annotation///0006352 // DNA-dependent transcription, initiation // inferred from direct assay///0006355 // regulation of transcription, DNA-dependent // inferred from electronic annotation///0006366 // transcription from RNA polymerase II promoter // inferred by curator///0006366 // transcription from RNA polymerase II promoter /…	0000125 // PCAF complex // inferred from direct assay///0005634 // nucleus // inferred from direct assay///0005654 // nucleoplasm // traceable author statement///0005669 // transcription factor TFIID complex // inferred from direct assay///0005737 // cytoplasm // inferred from direct assay///0030914 // STAGA complex // inferred from direct assay///0033276 // transcription factor TFTC complex // i…	0003700 // sequence-specific DNA binding transcription factor activity // inferred from direct assay///0003713 // transcription coactivator activity // inferred from direct assay///0004402 // histone acetyltransferase activity // inferred from direct assay///0005515 // protein binding // inferred from physical interaction///0019899 // enzyme binding // inferred from physical interaction///0030331…	chr11:6632072-6633437 (-) // 91.4 // p15.4	2013-10-23	This probe set was annotated using the Matching Probes based pipeline to a Entrez Gene identifier using 9 transcripts. // false // Matching Probes // A	ENST00000532344 // ensembl // 6 // Cross Hyb Matching Probes///OTTHUMT00000386959 // vega // 6 // Cross Hyb Matching Probes	AL833496(11),BC012088(11),CR541943(11),ENST00000299424(11),ENST00000526743(11),ENST00000527248(11),ENST00000531760(9),NM_006284(11),U13991(11)	Hs.89657	chr11p15.3	6633437	chr11	91.4	6632072	-		ENSG00000166337///OTTHUMG00000133402	TAF10 RNA polymerase II, TATA box binding protein (TBP)-associated factor, 30kDa	Human Genome U133 Plus 2.0 Array	February 2009 (Genome Reference Consortium GRCh37)	GO:0006351|GO:0006352|GO:0006355|GO:0006366|GO:0006366|GO:0006367|GO:0006367|GO:0006367|GO:0006368|GO:0010467|GO:0016032|GO:0016578|GO:0022415|GO:0043966|GO:0051260|GO:0000125|GO:0005634|GO:0005654|GO:0005669|GO:0005737|GO:0030914|GO:0033276|GO:0048471|GO:0003700|GO:0003713|GO:0004402|GO:0005515|GO:0019899|GO:0030331|GO:0070063	IPR003923 // Transcription initiation factor TFIID, 23-30kDa subunit // 1.2E-31		600475		NP_006275	NM_006284	NM_006284	GenBank
200056_s_at	571.447	416.354	477.646	697.896	506.175	758.424	0.16937	-0.0443444	0	0.745281	0.355391	0.71132	P	P	P	P	P	P	C1D	10438	0000460 // maturation of 5.8S rRNA // inferred from mutant phenotype///0006351 // transcription, DNA-dependent // inferred from electronic annotation///0006355 // regulation of transcription, DNA-dependent // inferred from electronic annotation///0006364 // rRNA processing // inferred from electronic annotation///0006915 // apoptotic process // inferred from electronic annotation///0045892 // neg…	0000176 // nuclear exosome (RNase complex) // traceable author statement///0005634 // nucleus // inferred from direct assay///0005730 // nucleolus // inferred from direct assay///0005737 // cytoplasm // inferred from electronic annotation///0005739 // mitochondrion // inferred from direct assay///0017053 // transcriptional repressor complex // inferred from electronic annotation	0003677 // DNA binding // inferred from electronic annotation///0003714 // transcription corepressor activity // inferred from electronic annotation///0003723 // RNA binding // inferred from direct assay///0005515 // protein binding // inferred from physical interaction///0016922 // ligand-dependent nuclear receptor binding // inferred from electronic annotation	chr2:68269339-68290121 (-) // 91.3 // p14	2013-10-23	This probe set was annotated using the Matching Probes based pipeline to a Entrez Gene identifier using 10 transcripts. // false // Matching Probes // A	ENST00000410067 // ensembl // 2 // Cross Hyb Matching Probes///ENST00000409302 // ensembl // 2 // Cross Hyb Matching Probes///OTTHUMT00000328526 // vega // 2 // Cross Hyb Matching Probes///OTTHUMT00000328527 // vega // 2 // Cross Hyb Matching Probes	BC005235(11),BC009584(11),BC009589(11),BC016284(11),ENST00000355848(11),ENST00000407324(11),NM_001190263(11),NM_001190265(11),NM_006333(11),NM_173177(11)	Hs.15164	chr2p13-p12	68290121	chr2	91.3	68269339	-		ENSG00000197223///OTTHUMG00000129564	C1D nuclear receptor corepressor	Human Genome U133 Plus 2.0 Array	February 2009 (Genome Reference Consortium GRCh37)	GO:0000460|GO:0006351|GO:0006355|GO:0006364|GO:0006915|GO:0045892|GO:0000176|GO:0005634|GO:0005730|GO:0005737|GO:0005739|GO:0017053|GO:0003677|GO:0003714|GO:0003723|GO:0005515|GO:0016922	IPR007146 // Sas10/Utp3/C1D // 4.7E-23///IPR007146 // Sas10/Utp3/C1D // 2.5E-23		606997		NP_001177192///NP_001177194///NP_006324///NP_775269	NM_001190263///NM_001190265///NM_006333///NM_173177	NM_006333	GenBank
200057_s_at	3292.9	3159.91	3196.89	3154.01	3200.26	3630	-0.0466189	0.137003	0	0.178729	0.273218	0.227561	P	P	P	P	P	P	NONO	4841	0006281 // DNA repair // inferred from electronic annotation///0006310 // DNA recombination // inferred from electronic annotation///0006351 // transcription, DNA-dependent // inferred from electronic annotation///0006355 // regulation of transcription, DNA-dependent // inferred from electronic annotation///0006397 // mRNA processing // inferred from electronic annotation///0006974 // response to…	0005634 // nucleus // traceable author statement///0005730 // nucleolus // inferred from electronic annotation///0016363 // nuclear matrix // inferred from direct assay///0016607 // nuclear speck // inferred from electronic annotation///0042382 // paraspeckles // inferred from direct assay	0000166 // nucleotide binding // inferred from electronic annotation///0003676 // nucleic acid binding // inferred from electronic annotation///0003677 // DNA binding // inferred from electronic annotation///0003723 // RNA binding // inferred from electronic annotation///0005515 // protein binding // inferred from physical interaction///0042802 // identical protein binding // inferred from physic…	chrX:70503501-70521016 (+) // 89.78 // q13.1///chr16:69789321-69791973 (-) // 87.58 // q22.1	2013-10-23	This probe set was annotated using the Matching Probes based pipeline to a Entrez Gene identifier using 15 transcripts. // false // Matching Probes // A	AK124741 // gb // 2 // Cross Hyb Matching Probes///ENST00000472185 // ensembl // 8 // Cross Hyb Matching Probes///OTTHUMT00000057148 // vega // 8 // Cross Hyb Matching Probes	AK055406(11),BC002364(11),BC010049(10),BC012141(10),BC028299(11),ENST00000276079(11),ENST00000373841(11),ENST00000471907(10),ENST00000490044(11),ENST00000535149(11),NM_001145408(11),NM_001145409(11),NM_001145410(11),NM_007363(11),U02493(11)	Hs.172207	chrXq13.1	70521016	chrX	89.78	70503501	+		ENSG00000147140///ENSG00000255591///OTTHUMG00000021798	non-POU domain containing, octamer-binding	Human Genome U133 Plus 2.0 Array	February 2009 (Genome Reference Consortium GRCh37)	GO:0006281|GO:0006310|GO:0006351|GO:0006355|GO:0006397|GO:0006974|GO:0008380|GO:0005634|GO:0005730|GO:0016363|GO:0016607|GO:0042382|GO:0000166|GO:0003676|GO:0003677|GO:0003723|GO:0005515|GO:0042802	IPR000504 // RNA recognition motif domain // 2.1E-19///IPR000504 // RNA recognition motif domain // 8.8E-17///IPR000504 // RNA recognition motif domain // 4.7E-10///IPR000504 // RNA recognition motif domain // 6.5E-17///IPR012975 // NOPS // 8.7E-33///IPR012975 // NOPS // 6.5E-33		300084	mRNA_processing_Reactome // GenMAPP	NP_001138880///NP_001138881///NP_001138882///NP_031389	NM_001145408///NM_001145409///NM_001145410///NM_007363	NM_007363	GenBank
200058_s_at	763.296	635.789	729.593	661.836	711.625	710.532	0	-0.0205994	0.024157	0.0817504	0.259877	0.0302234	P	P	P	P	P	P	SNRNP200	23020	0000354 // cis assembly of pre-catalytic spliceosome // inferred by curator///0000398 // mRNA splicing, via spliceosome // inferred by curator///0000398 // mRNA splicing, via spliceosome // inferred from direct assay///0000398 // mRNA splicing, via spliceosome // traceable author statement///0006397 // mRNA processing // inferred from electronic annotation///0008380 // RNA splicing // traceable a…	0005634 // nucleus // inferred from direct assay///0005654 // nucleoplasm // traceable author statement///0005681 // spliceosomal complex // inferred from direct assay///0005682 // U5 snRNP // inferred from direct assay///0005730 // nucleolus // inferred from direct assay///0019013 // viral nucleocapsid // inferred from electronic annotation///0030529 // ribonucleoprotein complex // inferred from…	0000166 // nucleotide binding // inferred from electronic annotation///0003676 // nucleic acid binding // inferred from electronic annotation///0003677 // DNA binding // inferred from electronic annotation///0004004 // ATP-dependent RNA helicase activity // inferred from direct assay///0004386 // helicase activity // inferred from electronic annotation///0005515 // protein binding // inferred fro…	chr2:96940474-96947651 (-) // 98.49 // q11.2	2013-10-23	This probe set was annotated using the Matching Probes based pipeline to a Entrez Gene identifier using 9 transcripts. // false // Matching Probes // A	AK303465 // gb // 6 // Cross Hyb Matching Probes///GENSCAN00000006712 // ensembl // 2 // Cross Hyb Matching Probes///GENSCAN00000030951 // ensembl // 8 // Cross Hyb Matching Probes///ENST00000429650 // ensembl // 8 // Cross Hyb Matching Probes///ENST00000583145 // ensembl // 2 // Cross Hyb Matching Probes///OTTHUMT00000445594 // vega // 2 // Cross Hyb Matching Probes///OTTHUMT00000338882 // vega …	AF085356(11),AF119874(11),AK303663(10),AY572488(11),BC131784(11),ENST00000323853(11),ENST00000349783(11),ENST00000497539(11),NM_014014(11)	Hs.246112	chr2q11.2	96947651	chr2	98.49	96940474	-	EC:3.6.4.13	ENSG00000144028///OTTHUMG00000130455	small nuclear ribonucleoprotein 200kDa (U5)	Human Genome U133 Plus 2.0 Array	February 2009 (Genome Reference Consortium GRCh37)	GO:0000354|GO:0000398|GO:0000398|GO:0000398|GO:0006397|GO:0008380|GO:0010467|GO:0005634|GO:0005654|GO:0005681|GO:0005682|GO:0005730|GO:0019013|GO:0030529|GO:0071013|GO:0000166|GO:0003676|GO:0003677|GO:0004004|GO:0004386|GO:0005515|GO:0005524|GO:0008026|GO:0016787|GO:0017111|GO:0042802	IPR001650 // Helicase, C-terminal // 1.6E-11///IPR001650 // Helicase, C-terminal // 6.6E-7///IPR004179 // Sec63 domain // 3.7E-115///IPR004179 // Sec63 domain // 2.3E-108///IPR004179 // Sec63 domain // 1.6E-12///IPR006935 // Helicase/UvrB domain // 8.6E-12///IPR006935 // Helicase/UvrB domain // 2.2E-11///IPR006935 // Helicase/UvrB domain // 1.3E-8///IPR011545 // DNA/RNA helicase, DEAD/DEAH box ty…		601664///610359		NP_054733	NM_014014	BC001417	GenBank
200059_s_at	6557.21	6170.32	6371.69	7036.17	6356.19	7072.2	-0.0479045	0.107455	0	0.341323	0.268178	0.194738	P	P	P	P	P	P	RHOA	387	0000902 // cell morphogenesis // inferred from electronic annotation///0001666 // response to hypoxia // inferred from electronic annotation///0006184 // GTP catabolic process // inferred from electronic annotation///0006357 // regulation of transcription from RNA polymerase II promoter // inferred from electronic annotation///0007049 // cell cycle // inferred from electronic annotation///0007155…	0005622 // intracellular // inferred from electronic annotation///0005634 // nucleus // inferred from electronic annotation///0005737 // cytoplasm // inferred from electronic annotation///0005739 // mitochondrion // inferred from electronic annotation///0005829 // cytosol // traceable author statement///0005856 // cytoskeleton // inferred from electronic annotation///0005886 // plasma membrane //…	0000166 // nucleotide binding // inferred from electronic annotation///0003924 // GTPase activity // traceable author statement///0005515 // protein binding // inferred from physical interaction///0005525 // GTP binding // inferred from electronic annotation///0017022 // myosin binding // inferred from physical interaction///0019904 // protein domain specific binding // inferred from electronic a…	chr3:49396929-49449362 (-) // 98.12 // p21.31	2013-10-23	This probe set was annotated using the Matching Probes based pipeline to a Entrez Gene identifier using 6 transcripts. // false // Matching Probes // A	AK296654 // gb // 4 // Cross Hyb Matching Probes///ENST00000454011 // ensembl // 8 // Cross Hyb Matching Probes///OTTHUMT00000346202 // vega // 8 // Cross Hyb Matching Probes	BC001360(11),BC005976(11),BX647063(11),ENST00000418115(11),L25080(11),NM_001664(11)	Hs.77273	chr3p21.3	49449362	chr3	98.12	49396929	-		ENSG00000067560///OTTHUMG00000156838	ras homolog family member A	Human Genome U133 Plus 2.0 Array	February 2009 (Genome Reference Consortium GRCh37)	GO:0000902|GO:0001666|GO:0006184|GO:0006357|GO:0007049|GO:0007155|GO:0007160|GO:0007165|GO:0007179|GO:0007264|GO:0007266|GO:0007411|GO:0007519|GO:0007596|GO:0008064|GO:0009612|GO:0009749|GO:0015031|GO:0019048|GO:0030036|GO:0030154|GO:0030168|GO:0030307|GO:0030334|GO:0030335|GO:0030521|GO:0030838|GO:0031098|GO:0032467|GO:0033144|GO:0033688|GO:0036089|GO:0042346|GO:0042493|GO:0043123|GO:0043124|GO:…	IPR000795 // Elongation factor, GTP-binding domain // 1.5E-8///IPR001806 // Small GTPase superfamily // 4.0E-62///IPR006689 // Small GTPase superfamily, ARF/SAR type // 7.3E-13///IPR013684 // Mitochondrial Rho-like // 3.4E-20		165390	G13_Signaling_Pathway // GenMAPP///G_Protein_Signaling // GenMAPP///Wnt_signaling // GenMAPP	NP_001655	NM_001664	BC001360	GenBank
200060_s_at	1432.9	1239.72	1178.15	1415.21	1407.42	1497.08	0	0.0341768	-0.193107	0.269602	0.335127	0.196778	P	P	P	P	P	P	RNPS1	10921	0000184 // nuclear-transcribed mRNA catabolic process, nonsense-mediated decay // inferred from direct assay///0000184 // nuclear-transcribed mRNA catabolic process, nonsense-mediated decay // inferred from mutant phenotype///0000184 // nuclear-transcribed mRNA catabolic process, nonsense-mediated decay // traceable author statement///0000398 // mRNA splicing, via spliceosome // traceable author …	0005634 // nucleus // inferred from direct assay///0005654 // nucleoplasm // traceable author statement///0005737 // cytoplasm // inferred from direct assay///0005829 // cytosol // traceable author statement///0016607 // nuclear speck // inferred from electronic annotation///0035145 // exon-exon junction complex // traceable author statement	0000166 // nucleotide binding // inferred from electronic annotation///0003676 // nucleic acid binding // inferred from electronic annotation///0003723 // RNA binding // traceable author statement///0003729 // mRNA binding // non-traceable author statement///0003730 // mRNA 3'-UTR binding // inferred from direct assay///0005515 // protein binding // inferred from physical interaction	chr4:11370249-11375356 (+) // 89.6 // p15.33///chr16:2303123-2318091 (-) // 91.38 // p13.3	2013-10-23	This probe set was annotated using the Matching Probes based pipeline to a Entrez Gene identifier using 15 transcripts. // false // Matching Probes // A	AK293343 // gb // 7 // Cross Hyb Matching Probes///AK316132 // gb // 7 // Cross Hyb Matching Probes	AF015608(11),AF274003(11),BC001659(11),BC001838(11),BC108316(11),ENST00000320225(11),ENST00000397086(11),ENST00000561718(11),ENST00000562205(11),ENST00000565678(11),ENST00000566397(11),ENST00000566458(11),L37368(11),NM_006711(11),NM_080594(11)	Hs.75104	chr16p13.3	11375356	chr4	89.6	11370249	+		ENSG00000205937///OTTHUMG00000128828	RNA binding protein S1, serine-rich domain	Human Genome U133 Plus 2.0 Array	February 2009 (Genome Reference Consortium GRCh37)	GO:0000184|GO:0000184|GO:0000184|GO:0000398|GO:0006351|GO:0006366|GO:0006369|GO:0006397|GO:0006406|GO:0008380|GO:0010467|GO:0016070|GO:0016071|GO:0031124|GO:0043065|GO:0048025|GO:0005634|GO:0005654|GO:0005737|GO:0005829|GO:0016607|GO:0035145|GO:0000166|GO:0003676|GO:0003723|GO:0003729|GO:0003730|GO:0005515	IPR000504 // RNA recognition motif domain // 4.4E-22///IPR000504 // RNA recognition motif domain // 3.9E-22///IPR000504 // RNA recognition motif domain // 4.7E-18		606447	mRNA_processing_Reactome // GenMAPP	NP_006702///NP_542161	NM_006711///NM_080594	BC001659	GenBank
200061_s_at	8093.95	7758.42	8325.73	8275.96	7853.29	7642.36	-0.130041	0.051971	0	0.189561	0.187416	-0.0793018	P	P	P	P	P	P	RPS24	6229	0000184 // nuclear-transcribed mRNA catabolic process, nonsense-mediated decay // traceable author statement///0000462 // maturation of SSU-rRNA from tricistronic rRNA transcript (SSU-rRNA, 5.8S rRNA, LSU-rRNA) // not recorded///0006364 // rRNA processing // inferred from mutant phenotype///0006412 // translation // inferred by curator///0006412 // translation // traceable author statement///0006…	0005622 // intracellular // inferred from electronic annotation///0005634 // nucleus // inferred from direct assay///0005730 // nucleolus // not recorded///0005737 // cytoplasm // inferred from direct assay///0005829 // cytosol // traceable author statement///0005840 // ribosome // inferred from electronic annotation///0015935 // small ribosomal subunit // inferred from direct assay///0015935 // …	0000166 // nucleotide binding // inferred from electronic annotation///0003735 // structural constituent of ribosome // non-traceable author statement///0031369 // translation initiation factor binding // inferred from sequence or structural similarity	chr10:79795108-79800454 (+) // 91.45 // q22.3	2013-10-23	This probe set was annotated using the Matching Probes based pipeline to a Entrez Gene identifier using 23 transcripts. // false // Matching Probes // A	GENSCAN00000010371 // ensembl // 3 // Cross Hyb Matching Probes///GENSCAN00000040873 // ensembl // 5 // Cross Hyb Matching Probes///ENST00000475468 // ensembl // 7 // Cross Hyb Matching Probes///ENST00000480662 // ensembl // 2 // Cross Hyb Matching Probes///ENST00000442520 // ensembl // 1 // Cross Hyb Matching Probes///ENST00000479895 // ensembl // 2 // Cross Hyb Matching Probes///ENST00000489251…	AF147330(11),BC000523(11),BC071926(11),BX537975(11),BX647260(11),ENST00000360830(11),ENST00000372360(11),ENST00000435275(11),ENST00000440692(11),ENST00000464716(11),ENST00000465692(10),ENST00000466129(11),ENST00000476545(11),ENST00000478655(11),ENST00000482069(10),ENST00000485708(11),M31520(11),NM_001026(11),NM_001142282(11),NM_001142283(11),NM_001142284(11),NM_001142285(11),NM_033022(11)	Hs.180450	chr10q22	79800454	chr10	91.45	79795108	+		ENSG00000138326///OTTHUMG00000018549	ribosomal protein S24	Human Genome U133 Plus 2.0 Array	February 2009 (Genome Reference Consortium GRCh37)	GO:0000184|GO:0000462|GO:0006364|GO:0006412|GO:0006412|GO:0006413|GO:0006414|GO:0006415|GO:0006614|GO:0010467|GO:0016032|GO:0016070|GO:0016071|GO:0019058|GO:0019083|GO:0034101|GO:0042274|GO:0044267|GO:0005622|GO:0005634|GO:0005730|GO:0005737|GO:0005829|GO:0005840|GO:0015935|GO:0015935|GO:0022627|GO:0030529|GO:0000166|GO:0003735|GO:0031369	IPR001976 // Ribosomal protein S24e // 5.8E-42///IPR001976 // Ribosomal protein S24e // 5.5E-42///IPR001976 // Ribosomal protein S24e // 3.9E-41///IPR001976 // Ribosomal protein S24e // 5.6E-42		602412///610629	mRNA_processing_binding_Reactome // GenMAPP///Ribosomal_Proteins // GenMAPP///Ribosomal_Proteins // GenMAPP///Ribosomal_Proteins // GenMAPP	NP_001017///NP_001135754///NP_001135755///NP_001135756///NP_001135757///NP_148982	NM_001026///NM_001142282///NM_001142283///NM_001142284///NM_001142285///NM_033022	BC000523	GenBank
200062_s_at	7905.77	7165.42	7376.64	8346.36	6873.28	8076.75	0	0.101242	-0.010633	0.36576	0.159097	0.164436	P	P	P	P	P	P	RPL30	6156	0000184 // nuclear-transcribed mRNA catabolic process, nonsense-mediated decay // traceable author statement///0006412 // translation // non-traceable author statement///0006412 // translation // traceable author statement///0006413 // translational initiation // traceable author statement///0006414 // translational elongation // traceable author statement///0006415 // translational termination /…	0005622 // intracellular // inferred from electronic annotation///0005737 // cytoplasm // inferred from direct assay///0005829 // cytosol // traceable author statement///0005840 // ribosome // inferred from electronic annotation///0022625 // cytosolic large ribosomal subunit // inferred from direct assay///0022625 // cytosolic large ribosomal subunit // traceable author statement///0030529 // rib…	0003723 // RNA binding // traceable author statement///0003735 // structural constituent of ribosome // non-traceable author statement///0003735 // structural constituent of ribosome // traceable author statement///0046872 // metal ion binding // inferred from electronic annotation	chr8:99053953-99057752 (-) // 98.74 // q22.2	2013-10-23	This probe set was annotated using the Matching Probes based pipeline to a Entrez Gene identifier using 14 transcripts. // false // Matching Probes // A	AK128768 // gb // 6 // Cross Hyb Matching Probes///ENST00000521534 // ensembl // 6 // Cross Hyb Matching Probes///ENST00000523172 // ensembl // 7 // Cross Hyb Matching Probes///ENST00000479312 // ensembl // 2 // Cross Hyb Matching Probes///ENST00000424262 // ensembl // 2 // Cross Hyb Matching Probes///ENST00000457129 // ensembl // 2 // Cross Hyb Matching Probes///ENST00000482744 // ensembl // 4 /…	AK308890(10),BC032700(11),BC095426(11),ENST00000287038(11),ENST00000396070(11),ENST00000517489(11),ENST00000518164(10),ENST00000518850(11),ENST00000520998(10),ENST00000521112(10),ENST00000521291(11),ENST00000521726(11),L05095(11),NM_000989(11)	Hs.111222	chr8q22	99057752	chr8	98.74	99053953	-		ENSG00000156482///OTTHUMG00000164796	ribosomal protein L30	Human Genome U133 Plus 2.0 Array	February 2009 (Genome Reference Consortium GRCh37)	GO:0000184|GO:0006412|GO:0006412|GO:0006413|GO:0006414|GO:0006415|GO:0006614|GO:0007059|GO:0010467|GO:0016032|GO:0016070|GO:0016071|GO:0019058|GO:0019083|GO:0044267|GO:0005622|GO:0005737|GO:0005829|GO:0005840|GO:0022625|GO:0022625|GO:0030529|GO:0003723|GO:0003735|GO:0003735|GO:0046872	IPR004038 // Ribosomal protein L7Ae/L30e/S12e/Gadd45 // 3.1E-31///IPR004038 // Ribosomal protein L7Ae/L30e/S12e/Gadd45 // 3.5E-16///IPR004038 // Ribosomal protein L7Ae/L30e/S12e/Gadd45 // 6.6E-17///IPR004038 // Ribosomal protein L7Ae/L30e/S12e/Gadd45 // 3.0E-31		180467	Ribosomal_Proteins // GenMAPP///Ribosomal_Proteins // GenMAPP///Ribosomal_Proteins // GenMAPP	NP_000980	NM_000989	L05095	GenBank
200063_s_at	6990.41	5808.43	6818.86	7802.81	6812.79	7462.25	0	-0.0241346	0.0534615	0.446135	0.323871	0.227798	P	P	P	P	P	P	NPM1	4869	0006281 // DNA repair // inferred from direct assay///0006334 // nucleosome assembly // inferred from direct assay///0006334 // nucleosome assembly // traceable author statement///0006886 // intracellular protein transport // traceable author statement///0006913 // nucleocytoplasmic transport // inferred from direct assay///0006913 // nucleocytoplasmic transport // traceable author statement///00…	0005634 // nucleus // inferred from direct assay///0005634 // nucleus // inferred from sequence or structural similarity///0005654 // nucleoplasm // inferred from direct assay///0005654 // nucleoplasm // traceable author statement///0005730 // nucleolus // inferred from direct assay///0005737 // cytoplasm // inferred from direct assay///0005737 // cytoplasm // inferred from sequence or structural…	0003676 // nucleic acid binding // inferred from electronic annotation///0003713 // transcription coactivator activity // inferred from direct assay///0003723 // RNA binding // inferred from direct assay///0004860 // protein kinase inhibitor activity // inferred from direct assay///0004888 // transmembrane signaling receptor activity // traceable author statement///0005515 // protein binding // i…	chr5:170814865-170837887 (+) // 91.8 // q35.1///chr5:93018225-93019510 (-) // 89.67 // q15	2013-10-23	This probe set was annotated using the Matching Probes based pipeline to a Entrez Gene identifier using 26 transcripts. // false // Matching Probes // A	TCONS_l2_00000180-XLOC_l2_000121 // broad-tucp // 6 // Cross Hyb Matching Probes///TCONS_l2_00008829-XLOC_l2_004791 // broad-tucp // 2 // Cross Hyb Matching Probes///n382632 // noncode // 2 // Cross Hyb Matching Probes///BC063128 // gb // 6 // Cross Hyb Matching Probes///AB451236 // gb // 6 // Cross Hyb Matching Probes///AY740634 // gb // 8 // Cross Hyb Matching Probes///AY740635 // gb // 8 // Cr…	AK290652(9),AY347529(11),AY740638(9),AY740639(9),AY740640(9),BC002398(11),BC008495(11),BC009623(11),BC012566(11),BC014349(11),BC016716(11),BC016768(11),BC016824(9),BC021668(11),BC021983(11),BC050628(11),DQ303464(11),ENST00000296930(11),ENST00000351986(11),ENST00000517671(11),ENST00000524204(11),M23613(11),M26697(11),M28699(11),NM_002520(11),NM_199185(11)	Hs.9614	chr5q35.1	170837887	chr5	91.8	170814865	+		ENSG00000181163///OTTHUMG00000130465	nucleophosmin (nucleolar phosphoprotein B23, numatrin)	Human Genome U133 Plus 2.0 Array	February 2009 (Genome Reference Consortium GRCh37)	GO:0006281|GO:0006334|GO:0006334|GO:0006886|GO:0006913|GO:0006913|GO:0006950|GO:0007098|GO:0007098|GO:0007165|GO:0007166|GO:0007569|GO:0007569|GO:0008104|GO:0008285|GO:0008285|GO:0010826|GO:0016032|GO:0019048|GO:0032071|GO:0034080|GO:0042255|GO:0043066|GO:0043066|GO:0044387|GO:0045727|GO:0046599|GO:0051092|GO:0051259|GO:0060699|GO:0060735|GO:0005634|GO:0005634|GO:0005654|GO:0005654|GO:0005730|GO:…			164040///601626	Nuclear_Receptors // GenMAPP	NP_001032827///NP_002511///NP_954654	NM_001037738///NM_002520///NM_199185	BC002398	GenBank
200064_at	5379.5	4798.39	4633.76	4616.74	5368.43	5000.28	0	0.0781727	-0.125979	0.0669236	0.358033	0.0281043	P	P	P	P	P	P	HSP90AB1	3326	0001890 // placenta development // inferred from electronic annotation///0006457 // protein folding // inferred from electronic annotation///0006950 // response to stress // inferred from electronic annotation///0006986 // response to unfolded protein // non-traceable author statement///0007411 // axon guidance // traceable author statement///0009651 // response to salt stress // inferred from el…	0005622 // intracellular // inferred from electronic annotation///0005737 // cytoplasm // non-traceable author statement///0005739 // mitochondrion // inferred from electronic annotation///0005829 // cytosol // traceable author statement///0008180 // signalosome // inferred from direct assay///0009986 // cell surface // inferred from electronic annotation///0016234 // inclusion body // inferred f…	0000166 // nucleotide binding // inferred from electronic annotation///0002134 // UTP binding // inferred from electronic annotation///0002135 // CTP binding // inferred from electronic annotation///0005515 // protein binding // inferred from physical interaction///0005524 // ATP binding // inferred from electronic annotation///0005525 // GTP binding // inferred from electronic annotation///00170…	chr4:88813270-88815273 (+) // 89.59 // q22.1///chr6:44217242-44221453 (+) // 91.37 // p21.1	2013-10-23	This probe set was annotated using the Matching Probes based pipeline to a Entrez Gene identifier using 19 transcripts. // false // Matching Probes // A	uc010iko.1 // ucsc_genes // 4 // Cross Hyb Matching Probes///n410191 // noncode // 4 // Cross Hyb Matching Probes///AY956764 // gb // 4 // Cross Hyb Matching Probes///GENSCAN00000026121 // ensembl // 4 // Cross Hyb Matching Probes///ENST00000505987 // ensembl // 4 // Cross Hyb Matching Probes///OTTHUMT00000363251 // vega // 4 // Cross Hyb Matching Probes	AF275719(11),AK290734(11),AK294643(11),AK297367(11),AY359878(11),BC004928(11),BC012807(11),BC014485(11),BC016753(11),BC068474(11),ENST00000353801(11),ENST00000371554(11),ENST00000371646(11),M16660(11),NM_001271969(11),NM_001271970(11),NM_001271971(11),NM_001271972(11),NM_007355(11)	Hs.74335	chr6p12	88815273	chr4	89.59	88813270	+		ENSG00000096384///OTTHUMG00000014761	heat shock protein 90kDa alpha (cytosolic), class B member 1	Human Genome U133 Plus 2.0 Array	February 2009 (Genome Reference Consortium GRCh37)	GO:0001890|GO:0006457|GO:0006950|GO:0006986|GO:0007411|GO:0009651|GO:0032092|GO:0032435|GO:0033160|GO:0035872|GO:0038096|GO:0043524|GO:0045087|GO:0045429|GO:0045793|GO:0060334|GO:0060338|GO:0071353|GO:0071407|GO:0071902|GO:0005622|GO:0005737|GO:0005739|GO:0005829|GO:0008180|GO:0009986|GO:0016234|GO:0016323|GO:0016324|GO:0031526|GO:0042470|GO:0000166|GO:0002134|GO:0002135|GO:0005515|GO:0005524|GO:…	IPR001404 // Heat shock protein Hsp90 // 1.1E-272///IPR003594 // Histidine kinase-like ATPase, ATP-binding domain // 6.2E-15		140572		NP_001258898///NP_001258899///NP_001258900///NP_001258901///NP_031381	NM_001271969///NM_001271970///NM_001271971///NM_001271972///NM_007355///NR_073528	AF275719	GenBank
200065_s_at	4390.19	3695.9	4324.67	4442.65	4042.4	4127.63	0	-0.00526524	0.0676131	0.304655	0.241931	0.0445962	P	P	P	P	P	P	ARF1///MIR3620	375///100500810	0006184 // GTP catabolic process // traceable author statement///0006644 // phospholipid metabolic process // traceable author statement///0006661 // phosphatidylinositol biosynthetic process // traceable author statement///0006810 // transport // inferred from electronic annotation///0006878 // cellular copper ion homeostasis // inferred from mutant phenotype///0006886 // intracellular protein t…	0000139 // Golgi membrane // traceable author statement///0005622 // intracellular // inferred from electronic annotation///0005634 // nucleus // inferred from electronic annotation///0005737 // cytoplasm // inferred from electronic annotation///0005794 // Golgi apparatus // inferred from electronic annotation///0005829 // cytosol // traceable author statement///0005886 // plasma membrane // trac…	0000166 // nucleotide binding // inferred from electronic annotation///0003924 // GTPase activity // traceable author statement///0004871 // signal transducer activity // inferred from electronic annotation///0005057 // receptor signaling protein activity // traceable author statement///0005515 // protein binding // inferred from physical interaction///0005525 // GTP binding // inferred from elec…	chr1:228270428-228286824 (+) // 98.52 // q42.13	2013-10-23	This probe set was annotated using the Matching Probes based pipeline to a Entrez Gene identifier using 21 transcripts. // true // Matching Probes // A	AK293553 // gb // 8 // Cross Hyb Matching Probes	uc001hrs.3(11),uc001hrr.3(11),uc001hru.3(11),uc001hrv.3(11),BC041066(11),AF052179(11),AF055002(11),AK296020(11),AK297792(10),BC009247(11),BC010429(11),BC011358(11),M36340(11),M84326(11),NM_001658(11),NM_001024226(11),NM_001024227(11),NM_001024228(11),ENST00000541182(11),ENST00000540651(11),ENST00000272102(11),ENST00000477821(9),OTTHUMT00000091650(11),OTTHUMT00000092126(9)	Hs.74571	chr1q42	228286824	chr1	98.52	228270428	+		ENSG00000143761///OTTHUMG00000037595	ADP-ribosylation factor 1///microRNA 3620	Human Genome U133 Plus 2.0 Array	February 2009 (Genome Reference Consortium GRCh37)	GO:0006184|GO:0006644|GO:0006661|GO:0006810|GO:0006878|GO:0006886|GO:0006890|GO:0006892|GO:0007186|GO:0007264|GO:0015031|GO:0016032|GO:0016044|GO:0016192|GO:0019886|GO:0044281|GO:0048205|GO:0050690|GO:0000139|GO:0005622|GO:0005634|GO:0005737|GO:0005794|GO:0005829|GO:0005886|GO:0012505|GO:0030017|GO:0048471|GO:0000166|GO:0003924|GO:0004871|GO:0005057|GO:0005515|GO:0005525|GO:0019001|GO:0031683	IPR001019 // Guanine nucleotide binding protein (G-protein), alpha subunit // 5.8E-12///IPR001806 // Small GTPase superfamily // 2.0E-16///IPR006689 // Small GTPase superfamily, ARF/SAR type // 1.9E-82///IPR006762 // Gtr1/RagA G protein // 7.4E-15///IPR013684 // Mitochondrial Rho-like // 1.5E-12///IPR019009 // Signal recognition particle receptor, beta subunit // 2.6E-18		103180		NP_001019397///NP_001019398///NP_001019399///NP_001649	NM_001024226///NM_001024227///NM_001024228///NM_001658///NR_037415	AF052179	GenBank
200066_at	335.199	329.837	310.148	261.345	286.746	288.192	0	0.219827	-0.0227551	-0.0715442	0.135756	-0.0844245	P	P	P	P	P	P	IK	3550	0006955 // immune response // traceable author statement///0007267 // cell-cell signaling // traceable author statement	0005615 // extracellular space // traceable author statement///0005634 // nucleus // inferred from electronic annotation	0005515 // protein binding // inferred from physical interaction///0042802 // identical protein binding // inferred from physical interaction	chr5:140027383-140042064 (+) // 92.23 // q31.3	2013-10-23	This probe set was annotated using the Matching Probes based pipeline to a Entrez Gene identifier using 9 transcripts. // false // Matching Probes // A	uc021yen.1 // ucsc_genes // 4 // Cross Hyb Matching Probes///AK308730 // gb // 4 // Cross Hyb Matching Probes///GENSCAN00000028124 // ensembl // 6 // Cross Hyb Matching Probes///GENSCAN00000032817 // ensembl // 5 // Cross Hyb Matching Probes///ENST00000518969 // ensembl // 8 // Cross Hyb Matching Probes///ENST00000515015 // ensembl // 7 // Cross Hyb Matching Probes///ENST00000434096 // ensembl //…	AF182645(11),AK097968(9),AK225924(11),AK293626(11),BC013005(11),BC071964(11),ENST00000417647(11),ENST00000515592(9),NM_006083(11)	Hs.8024	chr5q31.3	140042064	chr5	92.23	140027383	+		ENSG00000113141///OTTHUMG00000163374	IK cytokine, down-regulator of HLA II	Human Genome U133 Plus 2.0 Array	February 2009 (Genome Reference Consortium GRCh37)	GO:0006955|GO:0007267|GO:0005615|GO:0005634|GO:0005515|GO:0042802	IPR012492 // Protein RED, C-terminal // 2.5E-55///IPR012916 // RED-like, N-terminal // 9.5E-96		600549		NP_006074	NM_006083	AF182645	GenBank
200067_x_at	2922.53	2501.63	2856.46	2456.53	2115.62	2616.16	-0.0187454	0	0.0375772	0.0181785	-0.123877	-0.0449462	P	P	P	P	P	P	SNX3	8724	0006810 // transport // inferred from electronic annotation///0006897 // endocytosis // traceable author statement///0007154 // cell communication // inferred from electronic annotation///0015031 // protein transport // inferred from electronic annotation	0005737 // cytoplasm // inferred from direct assay///0005768 // endosome // inferred from electronic annotation///0005769 // early endosome // inferred from direct assay///0005829 // cytosol // traceable author statement///0010008 // endosome membrane // inferred from direct assay	0005515 // protein binding // inferred from physical interaction///0008289 // lipid binding // inferred from electronic annotation///0019903 // protein phosphatase binding // inferred from physical interaction///0032266 // phosphatidylinositol-3-phosphate binding // inferred from direct assay///0035091 // phosphatidylinositol binding // inferred from electronic annotation	chr6:108532425-108582464 (-) // 87.64 // q21	2013-10-23	This probe set was annotated using the Matching Probes based pipeline to a Entrez Gene identifier using 12 transcripts. // false // Matching Probes // A		AB047360(10),AF034546(10),AK289476(10),BC008444(10),BC014580(10),BC015179(10),BC016863(10),ENST00000230085(11),ENST00000368979(10),ENST00000426155(10),NM_003795(10),NM_152827(10)	Hs.12102	chr6q21	108582464	chr6	87.64	108532425	-		ENSG00000112335///OTTHUMG00000015323	sorting nexin 3	Human Genome U133 Plus 2.0 Array	February 2009 (Genome Reference Consortium GRCh37)	GO:0006810|GO:0006897|GO:0007154|GO:0015031|GO:0005737|GO:0005768|GO:0005769|GO:0005829|GO:0010008|GO:0005515|GO:0008289|GO:0019903|GO:0032266|GO:0035091	IPR001683 // Phox homologous domain // 5.0E-32///IPR001683 // Phox homologous domain // 9.4E-15///IPR001683 // Phox homologous domain // 9.4E-17		601349///605930		NP_003786///NP_690040	NM_003795///NM_152827///NM_152828	AL078596	GenBank
200068_s_at	3821.3	3208.15	3271.73	2766.94	3441.27	2984.42	0.00922584	0	-0.125476	-0.169028	0.219108	-0.213822	P	P	P	P	P	P	CANX	821	0002474 // antigen processing and presentation of peptide antigen via MHC class I // traceable author statement///0006457 // protein folding // traceable author statement///0007568 // aging // inferred from electronic annotation///0009306 // protein secretion // traceable author statement///0018279 // protein N-linked glycosylation via asparagine // traceable author statement///0019886 // antigen…	0005622 // intracellular // non-traceable author statement///0005737 // cytoplasm // inferred from electronic annotation///0005783 // endoplasmic reticulum // inferred from direct assay///0005788 // endoplasmic reticulum lumen // traceable author statement///0005789 // endoplasmic reticulum membrane // inferred from direct assay///0005791 // rough endoplasmic reticulum // inferred from electronic…	0005509 // calcium ion binding // inferred from electronic annotation///0005515 // protein binding // inferred from physical interaction///0034185 // apolipoprotein binding // inferred from electronic annotation///0035255 // ionotropic glutamate receptor binding // inferred from electronic annotation///0046872 // metal ion binding // inferred from electronic annotation///0051082 // unfolded prote…	chr5:179126011-179157652 (+) // 92.84 // q35.3	2013-10-23	This probe set was annotated using the Matching Probes based pipeline to a Entrez Gene identifier using 8 transcripts. // false // Matching Probes // A	n340776 // noncode // 11 // Negative Strand Matching Probes	BC003552(11),BC042843(11),ENST00000247461(11),ENST00000452673(11),L10284(11),M94859(11),NM_001024649(11),NM_001746(11)	Hs.155560	chr5q35	179157652	chr5	92.84	179126011	+		ENSG00000127022///OTTHUMG00000130910	calnexin	Human Genome U133 Plus 2.0 Array	February 2009 (Genome Reference Consortium GRCh37)	GO:0002474|GO:0006457|GO:0007568|GO:0009306|GO:0018279|GO:0019886|GO:0043687|GO:0044267|GO:0048488|GO:0072583|GO:0005622|GO:0005737|GO:0005783|GO:0005788|GO:0005789|GO:0005791|GO:0005840|GO:0016020|GO:0016021|GO:0030424|GO:0032839|GO:0042470|GO:0043025|GO:0043197|GO:0071556|GO:0005509|GO:0005515|GO:0034185|GO:0035255|GO:0046872|GO:0051082	IPR001580 // Calreticulin/calnexin // 1.2E-165		114217		NP_001019820///NP_001737	NM_001024649///NM_001746	M94859	GenBank
200069_at	126.36	134.923	116.882	106.063	149.861	124.273	0	0.337697	-0.0231738	0.0348997	0.607089	0.109548	P	P	P	P	P	P	SART3	9733	0006396 // RNA processing // inferred from electronic annotation	0005622 // intracellular // inferred from electronic annotation///0005634 // nucleus // inferred from electronic annotation///0005737 // cytoplasm // inferred from direct assay///0016607 // nuclear speck // inferred from electronic annotation///0043231 // intracellular membrane-bounded organelle // inferred from direct assay	0000166 // nucleotide binding // inferred from electronic annotation///0003676 // nucleic acid binding // inferred from electronic annotation///0003723 // RNA binding // inferred from electronic annotation///0005515 // protein binding // inferred from physical interaction	chr12:108915992-108954940 (-) // 98.25 // q23.3	2013-10-23	This probe set was annotated using the Matching Probes based pipeline to a Entrez Gene identifier using 1 transcripts. // false // Matching Probes // A	AB020880 // gb // 5 // Cross Hyb Matching Probes///ENST00000228284 // ensembl // 5 // Cross Hyb Matching Probes///OTTHUMT00000404094 // vega // 5 // Cross Hyb Matching Probes	NM_014706(11)	Hs.116875	chr12q24.1	108954940	chr12	98.25	108915992	-			squamous cell carcinoma antigen recognized by T cells 3	Human Genome U133 Plus 2.0 Array	February 2009 (Genome Reference Consortium GRCh37)	GO:0006396|GO:0005622|GO:0005634|GO:0005737|GO:0016607|GO:0043231|GO:0000166|GO:0003676|GO:0003723|GO:0005515			175900///611684		NP_055521	NM_014706	AI656011	GenBank
200070_at	194.068	164.871	180.052	179.853	123.884	220.148	0	0.00786591	-0.0188413	0.177777	-0.286577	0.315475	P	P	P	P	P	P	CNPPD1	27013	0000079 // regulation of cyclin-dependent protein serine/threonine kinase activity // inferred from electronic annotation	0016020 // membrane // inferred from electronic annotation///0016021 // integral to membrane // inferred from electronic annotation	0019901 // protein kinase binding // inferred from electronic annotation	chr2:220036619-220041638 (-) // 98.33 // q35	2013-10-23	This probe set was annotated using the Matching Probes based pipeline to a Entrez Gene identifier using 4 transcripts. // false // Matching Probes // A		BC001393(11),BC012821(11),ENST00000360507(11),NM_015680(11)	Hs.4973	chr2q35	220041638	chr2	98.33	220036619	-		ENSG00000115649///OTTHUMG00000133132	cyclin Pas1/PHO80 domain containing 1	Human Genome U133 Plus 2.0 Array	February 2009 (Genome Reference Consortium GRCh37)	GO:0000079|GO:0016020|GO:0016021|GO:0019901	IPR013922 // Cyclin PHO80-like // 1.0E-11				NP_056495	NM_015680	BC001393	GenBank
200071_at	931.261	793.768	899.737	906.34	884.407	1093.3	-0.0126266	0	0.026999	0.235759	0.273901	0.35237	P	P	P	P	P	P	SMNDC1	10285	0000375 // RNA splicing, via transesterification reactions // traceable author statement///0006397 // mRNA processing // inferred from electronic annotation///0006915 // apoptotic process // inferred from electronic annotation///0006917 // induction of apoptosis // traceable author statement///0008380 // RNA splicing // traceable author statement	0005634 // nucleus // traceable author statement///0005681 // spliceosomal complex // inferred from electronic annotation///0005737 // cytoplasm // inferred from electronic annotation///0015030 // Cajal body // inferred from electronic annotation///0016607 // nuclear speck // inferred from electronic annotation	0003723 // RNA binding // inferred from electronic annotation///0005515 // protein binding // inferred from physical interaction	chr10:112052507-112064697 (-) // 97.4 // q25.2	2013-10-23	This probe set was annotated using the Matching Probes based pipeline to a Entrez Gene identifier using 4 transcripts. // false // Matching Probes // A		BC011234(11),BC039110(11),ENST00000369603(11),NM_005871(11)	Hs.79968	chr10q23	112064697	chr10	97.4	112052507	-		ENSG00000119953///OTTHUMG00000019036	survival motor neuron domain containing 1	Human Genome U133 Plus 2.0 Array	February 2009 (Genome Reference Consortium GRCh37)	GO:0000375|GO:0006397|GO:0006915|GO:0006917|GO:0008380|GO:0005634|GO:0005681|GO:0005737|GO:0015030|GO:0016607|GO:0003723|GO:0005515	IPR010304 // Survival motor neuron // 5.4E-20		603519		NP_005862	NM_005871	BF224259	GenBank
200072_s_at	1565.76	1403.93	1218.04	1366.47	1970.96	1986.74	0	0.0856962	-0.272993	0.0911002	0.693035	0.477098	P	P	P	P	P	P	HNRNPM	4670	0000380 // alternative mRNA splicing, via spliceosome // inferred from mutant phenotype///0000398 // mRNA splicing, via spliceosome // inferred by curator///0000398 // mRNA splicing, via spliceosome // traceable author statement///0006397 // mRNA processing // inferred from electronic annotation///0008380 // RNA splicing // traceable author statement///0010467 // gene expression // traceable auth…	0005634 // nucleus // inferred from direct assay///0005654 // nucleoplasm // inferred from direct assay///0005654 // nucleoplasm // traceable author statement///0005681 // spliceosomal complex // inferred from direct assay///0005730 // nucleolus // inferred from direct assay///0005887 // integral to plasma membrane // traceable author statement///0016363 // nuclear matrix // inferred from direct …	0000166 // nucleotide binding // inferred from electronic annotation///0003676 // nucleic acid binding // inferred from electronic annotation///0003723 // RNA binding // non-traceable author statement///0005515 // protein binding // inferred from physical interaction///0019904 // protein domain specific binding // inferred from physical interaction	chr19:8509650-8553885 (+) // 98.37 // p13.2	2013-10-23	This probe set was annotated using the Matching Probes based pipeline to a Entrez Gene identifier using 11 transcripts. // false // Matching Probes // A	uc010xke.1 // ucsc_genes // 7 // Cross Hyb Matching Probes///uc002mkb.1 // ucsc_genes // 7 // Cross Hyb Matching Probes///AK093731 // gb // 7 // Cross Hyb Matching Probes///ENST00000597270 // ensembl // 2 // Cross Hyb Matching Probes///ENST00000597081 // ensembl // 7 // Cross Hyb Matching Probes///ENST00000598999 // ensembl // 7 // Cross Hyb Matching Probes///ENST00000602219 // ensembl // 7 // Cr…	AF061832(11),BC000138(11),BC019580(11),ENST00000325495(11),ENST00000348943(11),ENST00000596295(11),ENST00000600806(11),L03532(11),L32611(11),NM_005968(11),NM_031203(11)	Hs.79024	chr19p13.2	8553885	chr19	98.37	8509650	+		ENSG00000099783///OTTHUMG00000182383	heterogeneous nuclear ribonucleoprotein M	Human Genome U133 Plus 2.0 Array	February 2009 (Genome Reference Consortium GRCh37)	GO:0000380|GO:0000398|GO:0000398|GO:0006397|GO:0008380|GO:0010467|GO:0005634|GO:0005654|GO:0005654|GO:0005681|GO:0005730|GO:0005887|GO:0016363|GO:0019013|GO:0030529|GO:0042382|GO:0071013|GO:0000166|GO:0003676|GO:0003723|GO:0005515|GO:0019904	IPR000504 // RNA recognition motif domain // 2.7E-19///IPR000504 // RNA recognition motif domain // 1.3E-17///IPR000504 // RNA recognition motif domain // 7.1E-23///IPR000504 // RNA recognition motif domain // 2.5E-19///IPR000504 // RNA recognition motif domain // 1.2E-17///IPR000504 // RNA recognition motif domain // 6.6E-23///IPR024666 // Heterogeneous nuclear ribonucleoprotein M, PY nuclear lo…		160994		NP_005959///NP_112480	NM_005968///NM_031203	AF061832	GenBank
200073_s_at	1350.47	1100.23	1076.59	1452.13	1839.8	2210.63	0.0525618	0	-0.185126	0.444782	0.859651	0.89712	P	P	P	P	P	P	HNRNPD	3184	0000398 // mRNA splicing, via spliceosome // traceable author statement///0006351 // transcription, DNA-dependent // inferred from electronic annotation///0006355 // regulation of transcription, DNA-dependent // non-traceable author statement///0006396 // RNA processing // traceable author statement///0006401 // RNA catabolic process // traceable author statement///0008380 // RNA splicing // trac…	0005634 // nucleus // inferred from direct assay///0005634 // nucleus // non-traceable author statement///0005654 // nucleoplasm // traceable author statement///0005730 // nucleolus // inferred from direct assay///0005737 // cytoplasm // inferred from electronic annotation///0005829 // cytosol // traceable author statement///0019013 // viral nucleocapsid // inferred from electronic annotation///0…	0000166 // nucleotide binding // inferred from electronic annotation///0003676 // nucleic acid binding // inferred from electronic annotation///0003677 // DNA binding // inferred from electronic annotation///0003723 // RNA binding // inferred from direct assay///0003723 // RNA binding // non-traceable author statement///0005515 // protein binding // inferred from physical interaction///0042162 //…	chr4:83275123-83294767 (-) // 80.85 // q21.22	2013-10-23	This probe set was annotated using the Matching Probes based pipeline to a Entrez Gene identifier using 18 transcripts. // false // Matching Probes // A	TCONS_l2_00030233-XLOC_l2_015543 // broad-tucp // 4 // Cross Hyb Matching Probes///uc010ijr.1 // ucsc_genes // 8 // Cross Hyb Matching Probes///uc011cci.1 // ucsc_genes // 8 // Cross Hyb Matching Probes///AK292707 // gb // 8 // Cross Hyb Matching Probes///AK303552 // gb // 8 // Cross Hyb Matching Probes///GENSCAN00000012208 // ensembl // 2 // Cross Hyb Matching Probes///ENST00000508119 // ensembl…	AK300149(9),BC002401(11),BC023977(11),BC026015(11),D55672(11),D55673(11),D55674(11),ENST00000313899(11),ENST00000352301(11),ENST00000353341(11),ENST00000514325(11),ENST00000514671(11),ENST00000543098(11),M94630(11),NM_001003810(11),NM_002138(11),NM_031369(11),NM_031370(11)	Hs.303627	chr4q21	83294767	chr4	80.85	83275123	-		ENSG00000138668///OTTHUMG00000130290	heterogeneous nuclear ribonucleoprotein D (AU-rich element RNA binding protein 1, 37kDa)	Human Genome U133 Plus 2.0 Array	February 2009 (Genome Reference Consortium GRCh37)	GO:0000398|GO:0006351|GO:0006355|GO:0006396|GO:0006401|GO:0008380|GO:0010467|GO:0016070|GO:0016071|GO:0043488|GO:0045893|GO:0048255|GO:0005634|GO:0005634|GO:0005654|GO:0005730|GO:0005737|GO:0005829|GO:0019013|GO:0030529|GO:0000166|GO:0003676|GO:0003677|GO:0003723|GO:0003723|GO:0005515|GO:0042162	IPR000504 // RNA recognition motif domain // 3.1E-24///IPR000504 // RNA recognition motif domain // 2.2E-22///IPR000504 // RNA recognition motif domain // 2.4E-24///IPR000504 // RNA recognition motif domain // 1.7E-22///IPR000504 // RNA recognition motif domain // 7.8E-25///IPR000504 // RNA recognition motif domain // 5.2E-23///IPR000504 // RNA recognition motif domain // 2.8E-24///IPR000504 // R…		601324	mRNA_processing_Reactome // GenMAPP	NP_001003810///NP_002129///NP_112737///NP_112738	NM_001003810///NM_002138///NM_031369///NM_031370	M94630	GenBank
200074_s_at	4762.09	4551.67	4321.63	5235.5	4205.06	5405.8	0	0.177897	-0.0507112	0.42425	0.181533	0.316477	P	P	P	P	P	P	RPL14	9045	0000184 // nuclear-transcribed mRNA catabolic process, nonsense-mediated decay // traceable author statement///0006364 // rRNA processing // inferred from mutant phenotype///0006412 // translation // non-traceable author statement///0006412 // translation // traceable author statement///0006413 // translational initiation // traceable author statement///0006414 // translational elongation // trac…	0005622 // intracellular // inferred from electronic annotation///0005737 // cytoplasm // inferred from direct assay///0005829 // cytosol // traceable author statement///0005840 // ribosome // inferred from electronic annotation///0022625 // cytosolic large ribosomal subunit // inferred from direct assay///0030529 // ribonucleoprotein complex // inferred from electronic annotation	0003723 // RNA binding // traceable author statement///0003735 // structural constituent of ribosome // non-traceable author statement///0005515 // protein binding // inferred from physical interaction	chr12:63359099-63359795 (+) // 93.58 // q14.2///chr3:40499379-40503766 (+) // 93.72 // p22.1	2013-10-23	This probe set was annotated using the Matching Probes based pipeline to a Entrez Gene identifier using 21 transcripts. // false // Matching Probes // A	BC010079 // gb // 2 // Cross Hyb Matching Probes///BC033087 // gb // 2 // Cross Hyb Matching Probes///AF076465 // gb // 4 // Cross Hyb Matching Probes///GENSCAN00000023022 // ensembl // 6 // Cross Hyb Matching Probes///GENSCAN00000032258 // ensembl // 2 // Cross Hyb Matching Probes///ENST00000465280 // ensembl // 7 // Cross Hyb Matching Probes///ENST00000461368 // ensembl // 6 // Cross Hyb Matchi…	AK222750(11),AK290674(11),AK292045(11),BC000606(11),BC005134(11),BC009294(11),BC016379(10),BC019651(11),BC029036(11),BC071913(11),D87735(11),DQ118667(11),ENST00000338970(11),ENST00000396203(11),ENST00000416518(11),ENST00000435633(11),ENST00000479563(11),ENST00000481798(11),NM_001034996(11),NM_003973(11),U16738(11)	Hs.738	chr3p22-p21.2	63359795	chr12	93.58	63359099	+		ENSG00000139239///ENSG00000188846///OTTHUMG00000156046///OTTHUMG00000157598	ribosomal protein L14	Human Genome U133 Plus 2.0 Array	February 2009 (Genome Reference Consortium GRCh37)	GO:0000184|GO:0006364|GO:0006412|GO:0006412|GO:0006413|GO:0006414|GO:0006415|GO:0006614|GO:0010467|GO:0016032|GO:0016070|GO:0016071|GO:0019058|GO:0019083|GO:0042273|GO:0044267|GO:0005622|GO:0005737|GO:0005829|GO:0005840|GO:0022625|GO:0030529|GO:0003723|GO:0003735|GO:0005515	IPR002784 // Ribosomal protein L14 // 6.2E-35///IPR002784 // Ribosomal protein L14 // 3.9E-34			Ribosomal_Proteins // GenMAPP	NP_001030168///NP_003964	NM_001034996///NM_003973	U16738	GenBank
200075_s_at	1199.14	1010.37	1163.74	999.183	845.629	1133.72	0	-0.00402546	0.0460839	0.0243421	-0.142899	0.0526261	P	P	P	P	P	P	GUK1	2987	0006163 // purine nucleotide metabolic process // inferred from direct assay///0015949 // nucleobase-containing small molecule interconversion // traceable author statement///0016310 // phosphorylation // inferred from electronic annotation///0017144 // drug metabolic process // traceable author statement///0044281 // small molecule metabolic process // traceable author statement///0055086 // nuc…	0005829 // cytosol // traceable author statement	0000166 // nucleotide binding // inferred from electronic annotation///0004385 // guanylate kinase activity // inferred from direct assay///0005515 // protein binding // inferred from electronic annotation///0005524 // ATP binding // inferred from electronic annotation///0016301 // kinase activity // inferred from electronic annotation///0016740 // transferase activity // inferred from electronic…	chr1:228327990-228336644 (+) // 97.48 // q42.13	2013-10-23	This probe set was annotated using the Matching Probes based pipeline to a Entrez Gene identifier using 38 transcripts. // false // Matching Probes // A	AL832986 // gb // 8 // Cross Hyb Matching Probes///ENST00000462807 // ensembl // 6 // Cross Hyb Matching Probes///ENST00000485838 // ensembl // 8 // Cross Hyb Matching Probes///ENST00000498092 // ensembl // 6 // Cross Hyb Matching Probes///ENST00000435153 // ensembl // 7 // Cross Hyb Matching Probes///ENST00000460224 // ensembl // 6 // Cross Hyb Matching Probes///ENST00000485168 // ensembl // 4 /…	AK124677(9),AK303845(11),BC006249(11),BC009914(11),BC069001(11),BC091480(11),CR456836(10),CR542006(10),ENST00000312726(11),ENST00000366716(11),ENST00000366718(11),ENST00000366721(10),ENST00000366722(10),ENST00000366723(10),ENST00000366726(10),ENST00000366728(9),ENST00000366730(10),ENST00000391865(11),ENST00000412265(10),ENST00000453943(10),ENST00000464858(10),ENST00000465025(11),ENST00000470040(1…	Hs.900947	chr1q32-q41	228336644	chr1	97.48	228327990	+	EC:2.7.4.8	ENSG00000143774///OTTHUMG00000039503	guanylate kinase 1	Human Genome U133 Plus 2.0 Array	February 2009 (Genome Reference Consortium GRCh37)	GO:0006163|GO:0015949|GO:0016310|GO:0017144|GO:0044281|GO:0055086|GO:0005829|GO:0000166|GO:0004385|GO:0005515|GO:0005524|GO:0016301|GO:0016740	IPR008144 // Guanylate kinase // 1.5E-75///IPR008144 // Guanylate kinase // 3.5E-65///IPR008144 // Guanylate kinase // 2.2E-75///IPR008144 // Guanylate kinase // 3.1E-65///IPR008144 // Guanylate kinase // 5.3E-72///IPR008144 // Guanylate kinase // 6.7E-58///IPR008144 // Guanylate kinase // 7.2E-75		139270		NP_000849///NP_001152862///NP_001152863///NP_001229768///NP_001229769	NM_000858///NM_001159390///NM_001159391///NM_001242839///NM_001242840	BC006249	GenBank
200076_s_at	541.551	393.831	407.642	518.737	475.397	536.655	0.216425	0	-0.104063	0.441851	0.389464	0.336888	P	P	P	P	P	P	KXD1	79036	0016192 // vesicle-mediated transport // inferred from sequence or structural similarity	0031083 // BLOC-1 complex // inferred from sequence or structural similarity	0005515 // protein binding // inferred from physical interaction	chr19:18668603-18680184 (+) // 98.68 // p13.11	2013-10-23	This probe set was annotated using the Matching Probes based pipeline to a Entrez Gene identifier using 13 transcripts. // false // Matching Probes // A	ENST00000600654 // ensembl // 7 // Cross Hyb Matching Probes///OTTHUMT00000465102 // vega // 7 // Cross Hyb Matching Probes	AF173381(10),AK091145(11),BC001080(11),BC006479(11),ENST00000222307(11),ENST00000539106(11),ENST00000540691(11),ENST00000595073(11),ENST00000601630(11),ENST00000602094(11),NM_001171948(11),NM_001171949(11),NM_024069(11)	Hs.901110	chr19p13.11	18680184	chr19	98.68	18668603	+		ENSG00000105700///OTTHUMG00000183107	KxDL motif containing 1	Human Genome U133 Plus 2.0 Array	February 2009 (Genome Reference Consortium GRCh37)	GO:0016192|GO:0031083|GO:0005515	IPR019371 // Uncharacterised domain KxDL // 3.6E-41///IPR019371 // Uncharacterised domain KxDL // 3.7E-33		615178		NP_001165419///NP_001165420///NP_076974	NM_001171948///NM_001171949///NM_024069	BC006479	GenBank
200077_s_at	6105.83	5480.13	5934.44	6291.59	5126.83	5756.17	-0.0482316	0.0388856	0	0.282523	0.0606513	0.000257492	P	P	P	P	P	P	OAZ1	4946	0006521 // regulation of cellular amino acid metabolic process // traceable author statement///0006596 // polyamine biosynthetic process // traceable author statement///0034641 // cellular nitrogen compound metabolic process // traceable author statement///0043086 // negative regulation of catalytic activity // inferred from electronic annotation///0044281 // small molecule metabolic process // t…	0005829 // cytosol // traceable author statement	0004857 // enzyme inhibitor activity // inferred from electronic annotation///0005515 // protein binding // inferred from electronic annotation///0008073 // ornithine decarboxylase inhibitor activity // inferred from electronic annotation	chr19:2269537-2273302 (+) // 99.26 // p13.3	2013-10-23	This probe set was annotated using the Matching Probes based pipeline to a Entrez Gene identifier using 17 transcripts. // false // Matching Probes // A	GENSCAN00000019069 // ensembl // 4 // Cross Hyb Matching Probes///ENST00000592787 // ensembl // 2 // Cross Hyb Matching Probes///ENST00000589361 // ensembl // 2 // Cross Hyb Matching Probes///OTTHUMT00000451282 // vega // 2 // Cross Hyb Matching Probes///OTTHUMT00000451286 // vega // 2 // Cross Hyb Matching Probes///BC025017 // gb // 11 // Negative Strand Matching Probes	BC042364(11),BC055397(11),D78361(11),D87914(11),ENST00000322297(11),ENST00000581150(10),ENST00000582888(11),ENST00000583542(11),ENST00000586054(11),ENST00000588673(11),ENST00000589739(11),ENST00000590943(11),ENST00000592727(11),ENST00000593012(11),ENST00000602676(11),NM_004152(11),U09202(11)	Hs.901119	chr19p13.3	2273302	chr19	99.26	2269537	+		ENSG00000104904///OTTHUMG00000178459	ornithine decarboxylase antizyme 1	Human Genome U133 Plus 2.0 Array	February 2009 (Genome Reference Consortium GRCh37)	GO:0006521|GO:0006596|GO:0034641|GO:0043086|GO:0044281|GO:0005829|GO:0004857|GO:0005515|GO:0008073	IPR002993 // Ornithine decarboxylase antizyme // 6.3E-54///IPR002993 // Ornithine decarboxylase antizyme // 1.3E-49///IPR002993 // Ornithine decarboxylase antizyme // 1.2E-53///IPR002993 // Ornithine decarboxylase antizyme // 2.3E-51		601579	Nucleotide_Metabolism // GenMAPP	NP_004143	NM_004152	D87914	GenBank
200078_s_at	1245.47	1100.87	1151.1	1117.92	1014.04	1413.88	0	0.0650473	-0.024363	0.131654	0.0644369	0.31654	P	P	P	P	P	P	ATP6V0B	533	0006810 // transport // inferred from electronic annotation///0006811 // ion transport // inferred from electronic annotation///0006879 // cellular iron ion homeostasis // traceable author statement///0008286 // insulin receptor signaling pathway // traceable author statement///0015991 // ATP hydrolysis coupled proton transport // inferred from electronic annotation///0015992 // proton transport …	0005768 // endosome // inferred from electronic annotation///0005773 // vacuole // inferred from electronic annotation///0005774 // vacuolar membrane // inferred from electronic annotation///0010008 // endosome membrane // traceable author statement///0016020 // membrane // inferred from electronic annotation///0016021 // integral to membrane // inferred from electronic annotation///0030670 // ph…	0005215 // transporter activity // traceable author statement///0015078 // hydrogen ion transmembrane transporter activity // inferred from electronic annotation	chr1:44440647-44443966 (+) // 95.85 // p34.1	2013-10-23	This probe set was annotated using the Matching Probes based pipeline to a Entrez Gene identifier using 14 transcripts. // false // Matching Probes // A	GENSCAN00000011956 // ensembl // 8 // Cross Hyb Matching Probes///ENST00000496131 // ensembl // 5 // Cross Hyb Matching Probes///ENST00000472277 // ensembl // 8 // Cross Hyb Matching Probes///ENST00000532642 // ensembl // 8 // Cross Hyb Matching Probes///ENST00000472505 // ensembl // 2 // Cross Hyb Matching Probes///OTTHUMT00000386638 // vega // 2 // Cross Hyb Matching Probes///OTTHUMT00000386639…	BC000423(11),BC005876(11),BC053601(10),BT007151(9),CR456972(9),D89052(11),ENST00000236067(11),ENST00000468183(10),ENST00000471859(9),ENST00000472174(11),ENST00000473485(11),ENST00000498664(11),NM_001039457(11),NM_004047(11)	Hs.900734	chr1p32.3	44443966	chr1	95.85	44440647	+	EC:3.6.3.14	ENSG00000117410///OTTHUMG00000008298	ATPase, H+ transporting, lysosomal 21kDa, V0 subunit b	Human Genome U133 Plus 2.0 Array	February 2009 (Genome Reference Consortium GRCh37)	GO:0006810|GO:0006811|GO:0006879|GO:0008286|GO:0015991|GO:0015992|GO:0033572|GO:0051701|GO:0055085|GO:0090382|GO:0005768|GO:0005773|GO:0005774|GO:0010008|GO:0016020|GO:0016021|GO:0030670|GO:0033177|GO:0033179|GO:0005215|GO:0015078	IPR002379 // V-ATPase proteolipid subunit C-like domain // 3.0E-20///IPR002379 // V-ATPase proteolipid subunit C-like domain // 1.1E-19///IPR002379 // V-ATPase proteolipid subunit C-like domain // 1.7E-20///IPR002379 // V-ATPase proteolipid subunit C-like domain // 6.6E-20///IPR002379 // V-ATPase proteolipid subunit C-like domain // 4.5E-20///IPR002379 // V-ATPase proteolipid subunit C-like domai…		603717		NP_001034546///NP_004038	NM_001039457///NM_004047	BC005876	GenBank
200079_s_at	2034.11	1765.6	1776.47	2100.32	2201.08	2015.59	0	0.0388584	-0.106077	0.333728	0.474814	0.120368	P	P	P	P	P	P	KARS	3735	0006412 // translation // inferred from electronic annotation///0006418 // tRNA aminoacylation for protein translation // traceable author statement///0006430 // lysyl-tRNA aminoacylation // inferred from direct assay///0008033 // tRNA processing // non-traceable author statement///0010467 // gene expression // traceable author statement///0015966 // diadenosine tetraphosphate biosynthetic proces…	0005576 // extracellular region // inferred from electronic annotation///0005634 // nucleus // inferred from electronic annotation///0005737 // cytoplasm // inferred from direct assay///0005739 // mitochondrion // inferred from direct assay///0005759 // mitochondrial matrix // traceable author statement///0005829 // cytosol // traceable author statement///0005886 // plasma membrane // inferred fr…	0000049 // tRNA binding // non-traceable author statement///0000166 // nucleotide binding // inferred from electronic annotation///0003676 // nucleic acid binding // inferred from electronic annotation///0004812 // aminoacyl-tRNA ligase activity // inferred from electronic annotation///0004824 // lysine-tRNA ligase activity // inferred from direct assay///0004824 // lysine-tRNA ligase activity //…	chr16:75661792-75681563 (-) // 99.9 // q23.1	2013-10-23	This probe set was annotated using the Matching Probes based pipeline to a Entrez Gene identifier using 8 transcripts. // false // Matching Probes // A	ENST00000568378 // ensembl // 2 // Cross Hyb Matching Probes///ENST00000569298 // ensembl // 8 // Cross Hyb Matching Probes///OTTHUMT00000435509 // vega // 2 // Cross Hyb Matching Probes///OTTHUMT00000435511 // vega // 8 // Cross Hyb Matching Probes	AF285758(11),BC004132(11),D32053(11),ENST00000302445(11),ENST00000319410(11),ENST00000564578(11),NM_001130089(11),NM_005548(11)	Hs.3100	chr16q23.1	75681563	chr16	99.9	75661792	-	EC:6.1.1.6	ENSG00000065427///OTTHUMG00000137609	lysyl-tRNA synthetase	Human Genome U133 Plus 2.0 Array	February 2009 (Genome Reference Consortium GRCh37)	GO:0006412|GO:0006418|GO:0006430|GO:0008033|GO:0010467|GO:0015966|GO:0019048|GO:0005576|GO:0005634|GO:0005737|GO:0005739|GO:0005759|GO:0005829|GO:0005886|GO:0015630|GO:0016020|GO:0017101|GO:0000049|GO:0000166|GO:0003676|GO:0004812|GO:0004824|GO:0004824|GO:0005515|GO:0005524|GO:0016597|GO:0016874|GO:0046872	IPR004364 // Aminoacyl-tRNA synthetase, class II (D/K/N) // 2.5E-95///IPR004364 // Aminoacyl-tRNA synthetase, class II (D/K/N) // 2.2E-95///IPR004365 // Nucleic acid binding, OB-fold, tRNA/helicase-type // 4.2E-17///IPR004365 // Nucleic acid binding, OB-fold, tRNA/helicase-type // 3.9E-17		601421///613641		NP_001123561///NP_005539	NM_001130089///NM_005548	AF285758	GenBank
200080_s_at	5886.07	5510.03	6734.68	6018.28	5766.6	6767.2	-0.147851	0	0.135762	0.171714	0.18357	0.186968	P	P	P	P	P	P	H3F3A///H3F3AP4///H3F3B	3020///3021///440926	0006334 // nucleosome assembly // inferred from electronic annotation///0007420 // brain development // inferred from electronic annotation///0007596 // blood coagulation // traceable author statement///0009725 // response to hormone stimulus // inferred from electronic annotation	0000786 // nucleosome // inferred from electronic annotation///0005576 // extracellular region // traceable author statement///0005634 // nucleus // inferred from electronic annotation///0005654 // nucleoplasm // traceable author statement///0005694 // chromosome // inferred from electronic annotation	0003677 // DNA binding // inferred from electronic annotation///0005515 // protein binding // inferred from physical interaction///0046982 // protein heterodimerization activity // inferred from electronic annotation	chr1:226250427-226259702 (+) // 86.64 // q42.12	2013-10-23	This probe set was annotated using the Matching Probes based pipeline to a Entrez Gene identifier using 14 transcripts. // true // Matching Probes // A	n342728 // noncode // 4 // Cross Hyb Matching Probes///BC029405 // gb // 5 // Cross Hyb Matching Probes///BC095447 // gb // 5 // Cross Hyb Matching Probes	uc001hpw.3(11),uc021pjv.1(11),n405475(11),BC013857(11),AK291102(11),BC038989(11),BC081560(11),BC081561(11),M11353(11),M11354(11),NM_002107(11),NR_002315(11),ENST00000366815(11),ENST00000366813(11),ENST00000316450(11),OTTHUMT00000091323(11),OTTHUMT00000091324(11)	Hs.181307	chr17q25.1///chr1q42.12///chr2q31.1	226259702	chr1	86.64	226250427	+		ENSG00000163041///ENSG00000235655///OTTHUMG00000037507	H3 histone, family 3A///H3 histone, family 3A, pseudogene 4///H3 histone, family 3B (H3.3B)	Human Genome U133 Plus 2.0 Array	February 2009 (Genome Reference Consortium GRCh37)	GO:0006334|GO:0007420|GO:0007596|GO:0009725|GO:0000786|GO:0005576|GO:0005634|GO:0005654|GO:0005694|GO:0003677|GO:0005515|GO:0046982	IPR007125 // Histone core // 6.6E-37		601058///601128		NP_002098///NP_005315	NM_002107///NM_005324///NR_002315	AI955655	GenBank
200081_s_at	8107.98	7716.34	7836.35	9038.11	8334.98	8632.41	-0.0401473	0.131521	0	0.404051	0.360693	0.18384	P	P	P	P	P	P	RPS6	6194	0000028 // ribosomal small subunit assembly // inferred from electronic annotation///0000184 // nuclear-transcribed mRNA catabolic process, nonsense-mediated decay // traceable author statement///0006364 // rRNA processing // inferred from mutant phenotype///0006412 // translation // inferred by curator///0006412 // translation // traceable author statement///0006413 // translational initiation /…	0005622 // intracellular // inferred from electronic annotation///0005634 // nucleus // inferred from direct assay///0005730 // nucleolus // inferred from direct assay///0005737 // cytoplasm // inferred from direct assay///0005829 // cytosol // traceable author statement///0005840 // ribosome // inferred from electronic annotation///0015935 // small ribosomal subunit // inferred from direct assay…	0003735 // structural constituent of ribosome // inferred from electronic annotation///0005515 // protein binding // inferred from physical interaction///0019901 // protein kinase binding // inferred from physical interaction	chr9:19200301-19379609 (-) // 81.3 // p22.1	2013-10-23	This probe set was annotated using the Matching Probes based pipeline to a Entrez Gene identifier using 16 transcripts. // false // Matching Probes // A	BC017696 // gb // 4 // Cross Hyb Matching Probes///BC052613 // gb // 2 // Cross Hyb Matching Probes///GENSCAN00000007332 // ensembl // 2 // Cross Hyb Matching Probes///GENSCAN00000010838 // ensembl // 6 // Cross Hyb Matching Probes///GENSCAN00000012212 // ensembl // 2 // Cross Hyb Matching Probes///GENSCAN00000039043 // ensembl // 2 // Cross Hyb Matching Probes///ENST00000498815 // ensembl // 4 /…	AB062123(11),AK093634(11),AK291517(11),BC000524(11),BC013296(11),BC027620(11),BC071907(11),BC071908(11),BC094826(11),ENST00000315377(11),ENST00000380381(11),ENST00000380384(11),ENST00000380394(11),J03537(11),M20020(11),NM_001010(11)	Hs.241507	chr9p21	19379609	chr9	81.3	19200301	-		ENSG00000137154///OTTHUMG00000019642	ribosomal protein S6	Human Genome U133 Plus 2.0 Array	February 2009 (Genome Reference Consortium GRCh37)	GO:0000028|GO:0000184|GO:0006364|GO:0006412|GO:0006412|GO:0006413|GO:0006414|GO:0006415|GO:0006614|GO:0008286|GO:0010467|GO:0016032|GO:0016070|GO:0016071|GO:0019058|GO:0019083|GO:0031929|GO:0042274|GO:0042593|GO:0043065|GO:0044267|GO:0005622|GO:0005634|GO:0005730|GO:0005737|GO:0005829|GO:0005840|GO:0015935|GO:0022627|GO:0022627|GO:0030529|GO:0003735|GO:0005515|GO:0019901	IPR001377 // Ribosomal protein S6e // 4.1E-70///IPR001377 // Ribosomal protein S6e // 6.5E-53///IPR001377 // Ribosomal protein S6e // 2.7E-21		180460	mRNA_processing_binding_Reactome // GenMAPP///Ribosomal_Proteins // GenMAPP///Ribosomal_Proteins // GenMAPP///Ribosomal_Proteins // GenMAPP	NP_001001	NM_001010	BE741754	GenBank
200082_s_at	6005.69	5953.74	5835.84	7607.97	6170.7	7447.24	-0.0479178	0.182641	0	0.580782	0.352189	0.396023	P	P	P	P	P	P	RPS7	6201	0000184 // nuclear-transcribed mRNA catabolic process, nonsense-mediated decay // traceable author statement///0006364 // rRNA processing // inferred from mutant phenotype///0006412 // translation // inferred by curator///0006412 // translation // non-traceable author statement///0006412 // translation // traceable author statement///0006413 // translational initiation // traceable author stateme…	0005622 // intracellular // inferred from electronic annotation///0005634 // nucleus // inferred from direct assay///0005730 // nucleolus // inferred from direct assay///0005737 // cytoplasm // inferred from electronic annotation///0005815 // microtubule organizing center // inferred from electronic annotation///0005829 // cytosol // traceable author statement///0005840 // ribosome // inferred fr…	0003723 // RNA binding // non-traceable author statement///0003735 // structural constituent of ribosome // inferred from electronic annotation///0005515 // protein binding // inferred from physical interaction	chr2:3622908-3628502 (+) // 83.42 // p25.3	2013-10-23	This probe set was annotated using the Matching Probes based pipeline to a Entrez Gene identifier using 14 transcripts. // false // Matching Probes // A	AK298720 // gb // 4 // Cross Hyb Matching Probes///GENSCAN00000009955 // ensembl // 6 // Cross Hyb Matching Probes///GENSCAN00000032515 // ensembl // 4 // Cross Hyb Matching Probes///GENSCAN00000032659 // ensembl // 5 // Cross Hyb Matching Probes///GENSCAN00000037439 // ensembl // 6 // Cross Hyb Matching Probes///GENSCAN00000038718 // ensembl // 2 // Cross Hyb Matching Probes///ENST00000418311 //…	AB209386(11),AF085824(10),BC002866(11),BC061901(11),BC071919(11),ENST00000304921(11),ENST00000403564(11),ENST00000406376(11),ENST00000407445(11),ENST00000462576(11),ENST00000479123(10),ENST00000481006(11),ENST00000491937(11),NM_001011(11)	Hs.301547	chr2p25	3628502	chr2	83.42	3622908	+	EC:3.6.5.3	ENSG00000171863///ENSG00000183405///ENSG00000213326///ENSG00000263266///OTTHUMG00000090305///OTTHUMG00000132828///OTTHUMG00000157855///OTTHUMG00000181694	ribosomal protein S7	Human Genome U133 Plus 2.0 Array	February 2009 (Genome Reference Consortium GRCh37)	GO:0000184|GO:0006364|GO:0006412|GO:0006412|GO:0006412|GO:0006413|GO:0006414|GO:0006415|GO:0006614|GO:0010467|GO:0016032|GO:0016070|GO:0016071|GO:0019058|GO:0019083|GO:0042274|GO:0044267|GO:0005622|GO:0005634|GO:0005730|GO:0005737|GO:0005815|GO:0005829|GO:0005840|GO:0005856|GO:0022627|GO:0022627|GO:0030529|GO:0030686|GO:0032040|GO:0003723|GO:0003735|GO:0005515	IPR000554 // Ribosomal protein S7e // 5.1E-95///IPR000554 // Ribosomal protein S7e // 2.5E-84		603658///612563	mRNA_processing_binding_Reactome // GenMAPP///Ribosomal_Proteins // GenMAPP///Ribosomal_Proteins // GenMAPP///Ribosomal_Proteins // GenMAPP	NP_001002	NM_001011	AI805587	GenBank
200083_at	2114.13	1407.7	1756.31	1580.81	1350.66	1917.53	0.178209	-0.165422	0	0.0463238	-0.107193	0.170955	P	P	P	P	P	P	USP22	23326	0006351 // transcription, DNA-dependent // inferred from electronic annotation///0006355 // regulation of transcription, DNA-dependent // inferred from electronic annotation///0006508 // proteolysis // inferred from electronic annotation///0006511 // ubiquitin-dependent protein catabolic process // inferred from electronic annotation///0007049 // cell cycle // inferred from electronic annotation/…	0000124 // SAGA complex // inferred from direct assay///0005634 // nucleus // inferred from electronic annotation///0070461 // SAGA-type complex // inferred from direct assay	0003713 // transcription coactivator activity // inferred from direct assay///0004221 // ubiquitin thiolesterase activity // inferred from electronic annotation///0004843 // ubiquitin-specific protease activity // inferred from direct assay///0004843 // ubiquitin-specific protease activity // inferred from mutant phenotype///0005515 // protein binding // inferred from physical interaction///00082…	chr17:20902905-20946352 (-) // 88.49 // p11.2	2013-10-23	This probe set was annotated using the Matching Probes based pipeline to a Entrez Gene identifier using 5 transcripts. // false // Matching Probes // A	ENST00000580962 // ensembl // 10 // Negative Strand Matching Probes///OTTHUMT00000444063 // vega // 10 // Negative Strand Matching Probes	AB028986(11),AL110213(11),ENST00000261497(11),ENST00000537526(11),NM_015276(11)	Hs.12064	chr17p11.2	20946352	chr17	88.49	20902905	-	EC:3.4.19.12	ENSG00000124422///OTTHUMG00000133621	ubiquitin specific peptidase 22	Human Genome U133 Plus 2.0 Array	February 2009 (Genome Reference Consortium GRCh37)	GO:0006351|GO:0006355|GO:0006508|GO:0006511|GO:0007049|GO:0009790|GO:0016568|GO:0016574|GO:0016578|GO:0016579|GO:0043967|GO:0045893|GO:0045931|GO:0000124|GO:0005634|GO:0070461|GO:0003713|GO:0004221|GO:0004843|GO:0004843|GO:0005515|GO:0008233|GO:0008234|GO:0008270|GO:0010485|GO:0016787|GO:0030374|GO:0046872	IPR001394 // Peptidase C19, ubiquitin carboxyl-terminal hydrolase 2 // 3.4E-67///IPR001394 // Peptidase C19, ubiquitin carboxyl-terminal hydrolase 2 // 3.2E-67///IPR001607 // Zinc finger, UBP-type // 7.7E-18///IPR001607 // Zinc finger, UBP-type // 7.5E-18		612116		NP_056091	NM_015276	AA621731	GenBank
200084_at	1916.78	1483.14	1729.45	2034.49	1696.74	2325.84	0.0590692	-0.0678678	0	0.432569	0.244149	0.4717	P	P	P	P	P	P	C11orf58	10944				chr11:16760193-16777566 (+) // 93.82 // p15.1	2013-10-23	This probe set was annotated using the Matching Probes based pipeline to a Entrez Gene identifier using 8 transcripts. // false // Matching Probes // A		AK094549(11),BC007103(11),BC016352(11),BC020937(11),BC103747(11),ENST00000228136(11),ENST00000422258(11),NM_014267(11)	Hs.78050	chr11p15.1	16777566	chr11	93.82	16760193	+		ENSG00000110696///OTTHUMG00000165910	chromosome 11 open reading frame 58	Human Genome U133 Plus 2.0 Array	February 2009 (Genome Reference Consortium GRCh37)						NP_055082	NM_001142705///NM_014267	BE748698	GenBank
200085_s_at	2710.45	3008.61	3110.46	2726.67	2507.52	2557.01	-0.2879	0.105759	0	0.00822735	-0.0391679	-0.238408	P	P	P	P	P	P	TCEB2	6923	0006351 // transcription, DNA-dependent // inferred from electronic annotation///0006355 // regulation of transcription, DNA-dependent // inferred from electronic annotation///0006366 // transcription from RNA polymerase II promoter // traceable author statement///0006368 // transcription elongation from RNA polymerase II promoter // traceable author statement///0006414 // translational elongatio…	0005634 // nucleus // inferred from electronic annotation///0005654 // nucleoplasm // traceable author statement///0005829 // cytosol // traceable author statement///0031462 // Cul2-RING ubiquitin ligase complex // inferred from direct assay///0031466 // Cul5-RING ubiquitin ligase complex // inferred from direct assay	0003746 // translation elongation factor activity // inferred from electronic annotation///0005515 // protein binding // inferred from physical interaction///0031625 // ubiquitin protein ligase binding // inferred from direct assay	chr16:2821415-2827281 (-) // 77.82 // p13.3	2013-10-23	This probe set was annotated using the Matching Probes based pipeline to a Entrez Gene identifier using 10 transcripts. // false // Matching Probes // A	GENSCAN00000045727 // ensembl // 4 // Cross Hyb Matching Probes///ENST00000423418 // ensembl // 2 // Cross Hyb Matching Probes///ENST00000526184 // ensembl // 4 // Cross Hyb Matching Probes///ENST00000535377 // ensembl // 4 // Cross Hyb Matching Probes///ENST00000447693 // ensembl // 2 // Cross Hyb Matching Probes///OTTHUMT00000047521 // vega // 2 // Cross Hyb Matching Probes///OTTHUMT00000386087…	BC013306(11),BC065000(11),ENST00000262306(11),ENST00000409477(11),ENST00000409906(11),ENST00000494946(11),ENST00000572954(10),L42856(11),NM_007108(11),NM_207013(11)	Hs.172772	chr16p12.3	2827281	chr16	77.82	2821415	-		ENSG00000103363///OTTHUMG00000154125	transcription elongation factor B (SIII), polypeptide 2 (18kDa, elongin B)	Human Genome U133 Plus 2.0 Array	February 2009 (Genome Reference Consortium GRCh37)	GO:0006351|GO:0006355|GO:0006366|GO:0006368|GO:0006414|GO:0006461|GO:0010467|GO:0016032|GO:0016567|GO:0022415|GO:0033554|GO:0050434|GO:0061418|GO:0071456|GO:0005634|GO:0005654|GO:0005829|GO:0031462|GO:0031466|GO:0003746|GO:0005515|GO:0031625	IPR000626 // Ubiquitin // 2.8E-11///IPR000626 // Ubiquitin // 1.4E-11///IPR000626 // Ubiquitin // 1.2E-11		600787		NP_009039///NP_996896	NM_007108///NM_207013	NM_007108	GenBank
200086_s_at	2906.52	2694.04	2589.02	2833.01	2439.85	2950.75	0	0.133574	-0.0775771	0.250558	0.1085	0.155351	P	P	P	P	P	P	COX4I1	1327	0006091 // generation of precursor metabolites and energy // traceable author statement///0007584 // response to nutrient // inferred from electronic annotation///0022904 // respiratory electron transport chain // traceable author statement///0044237 // cellular metabolic process // traceable author statement///0044281 // small molecule metabolic process // traceable author statement	0005634 // nucleus // inferred from direct assay///0005739 // mitochondrion // inferred from direct assay///0005743 // mitochondrial inner membrane // traceable author statement///0016020 // membrane // inferred from electronic annotation	0004129 // cytochrome-c oxidase activity // inferred from electronic annotation///0005515 // protein binding // inferred from physical interaction	chr16:85833330-85840605 (+) // 50.86 // q24.1	2013-10-23	This probe set was annotated using the Matching Probes based pipeline to a Entrez Gene identifier using 21 transcripts. // false // Matching Probes // A	ENST00000565078 // ensembl // 4 // Cross Hyb Matching Probes///ENST00000570123 // ensembl // 6 // Cross Hyb Matching Probes///ENST00000566115 // ensembl // 6 // Cross Hyb Matching Probes///ENST00000567241 // ensembl // 6 // Cross Hyb Matching Probes///ENST00000563774 // ensembl // 6 // Cross Hyb Matching Probes///ENST00000567266 // ensembl // 6 // Cross Hyb Matching Probes///ENST00000566617 // en…	AK027136(11),BC008704(11),BC021236(11),BC047869(11),BC062437(11),BT019825(10),ENST00000253452(11),ENST00000561569(11),ENST00000562336(11),ENST00000562929(9),ENST00000564544(9),ENST00000564648(10),ENST00000564903(10),ENST00000566405(9),ENST00000568339(11),ENST00000568794(9),ENST00000569997(11),M21575(11),M34600(11),NM_001861(11),U90915(11)	Hs.113205	chr16q24.1	85840605	chr16	50.86	85833330	+	EC:1.9.3.1	ENSG00000131143///OTTHUMG00000137649	cytochrome c oxidase subunit IV isoform 1	Human Genome U133 Plus 2.0 Array	February 2009 (Genome Reference Consortium GRCh37)	GO:0006091|GO:0007584|GO:0022904|GO:0044237|GO:0044281|GO:0005634|GO:0005739|GO:0005743|GO:0016020|GO:0004129|GO:0005515	IPR004203 // Cytochrome c oxidase subunit IV family // 1.8E-33///IPR004203 // Cytochrome c oxidase subunit IV family // 4.4E-55///IPR004203 // Cytochrome c oxidase subunit IV family // 9.1E-40///IPR004203 // Cytochrome c oxidase subunit IV family // 5.1E-17///IPR004203 // Cytochrome c oxidase subunit IV family // 1.3E-33		123864	Electron_Transport_Chain // GenMAPP	NP_001852	NM_001861	AA854966	GenBank
200087_s_at	4856.91	3304.39	3819.85	4254.76	3235.24	4548.31	0.257216	-0.0553441	0	0.353774	0.0320525	0.296075	P	P	P	P	P	P	TMED2	10959	0001701 // in utero embryonic development // inferred from electronic annotation///0001756 // somitogenesis // inferred from electronic annotation///0001843 // neural tube closure // inferred from electronic annotation///0001892 // embryonic placenta development // inferred from electronic annotation///0001893 // maternal placenta development // inferred from electronic annotation///0001947 // he…	0005783 // endoplasmic reticulum // inferred from direct assay///0005789 // endoplasmic reticulum membrane // inferred from electronic annotation///0005793 // endoplasmic reticulum-Golgi intermediate compartment // inferred from direct assay///0005794 // Golgi apparatus // inferred from direct assay///0016020 // membrane // inferred from electronic annotation///0016021 // integral to membrane // …	0005515 // protein binding // inferred from physical interaction	chr12:124074913-124083128 (+) // 92.36 // q24.31	2013-10-23	This probe set was annotated using the Matching Probes based pipeline to a Entrez Gene identifier using 3 transcripts. // false // Matching Probes // A		BC025957(11),ENST00000262225(11),NM_006815(11)	Hs.75914	chr12q24.31	124083128	chr12	92.36	124074913	+		ENSG00000086598///OTTHUMG00000168694	transmembrane emp24 domain trafficking protein 2	Human Genome U133 Plus 2.0 Array	February 2009 (Genome Reference Consortium GRCh37)	GO:0001701|GO:0001756|GO:0001843|GO:0001892|GO:0001893|GO:0001947|GO:0006810|GO:0006886|GO:0006888|GO:0007030|GO:0010628|GO:0015031|GO:0016192|GO:0032525|GO:0034260|GO:0035264|GO:0035459|GO:0036342|GO:0048205|GO:0048208|GO:0048598|GO:0072661|GO:0005783|GO:0005789|GO:0005793|GO:0005794|GO:0016020|GO:0016021|GO:0030137|GO:0030659|GO:0030663|GO:0031410|GO:0032580|GO:0033116|GO:0042589|GO:0043231|GO:…	IPR009038 // GOLD // 5.8E-53				NP_006806	NM_006815	AK024976	GenBank
200088_x_at	7043.02	7675.53	6843.45	8056.18	7382.03	7775.62	-0.0478377	0.31933	0	0.433583	0.380989	0.228492	P	P	P	P	P	P	NBEAL1///RPL12	6136///65065	0000184 // nuclear-transcribed mRNA catabolic process, nonsense-mediated decay // traceable author statement///0006412 // translation // non-traceable author statement///0006412 // translation // traceable author statement///0006413 // translational initiation // traceable author statement///0006414 // translational elongation // traceable author statement///0006415 // translational termination /…	0005829 // cytosol // traceable author statement///0005840 // ribosome // inferred from electronic annotation///0022625 // cytosolic large ribosomal subunit // inferred from direct assay///0030529 // ribonucleoprotein complex // inferred from electronic annotation	0003723 // RNA binding // inferred from electronic annotation///0003735 // structural constituent of ribosome // non-traceable author statement///0005515 // protein binding // inferred from physical interaction	chr2:204045678-204056058 (+) // 76.19 // q33.2	2013-10-23	This probe set was annotated using the Matching Probes based pipeline to a Entrez Gene identifier using 13 transcripts. // true // Matching Probes // A	TCONS_l2_00003732-XLOC_l2_002076 // broad-tucp // 2 // Cross Hyb Matching Probes///uc010qat.2 // ucsc_genes // 2 // Cross Hyb Matching Probes///uc009xie.3 // ucsc_genes // 2 // Cross Hyb Matching Probes///uc001iio.1 // ucsc_genes // 2 // Cross Hyb Matching Probes///uc002iyr.1 // ucsc_genes // 5 // Cross Hyb Matching Probes///n383209 // noncode // 5 // Cross Hyb Matching Probes///BC067892 // gb //…	uc004bqy.2(11),uc004bqz.2(10),BC008230(11),BC071921(11),BC085006(11),AK026491(11),AK026526(11),AK057602(11),AK098493(9),BC050644(11),BC059950(10),BC094831(11),BC105603(11),L06505(11),NM_000976(11),GENSCAN00000009645(11),GENSCAN00000019086(11),GENSCAN00000026556(9),ENST00000460355(11),ENST00000361436(11),ENST00000497825(11),ENST00000497322(11),ENST00000536368(10),ENST00000431098(11),ENST0000031439…	Hs.182979	chr2q33.2///chr9q34	204056058	chr2	76.19	204045678	+		ENSG00000144426///ENSG00000185834///ENSG00000197958///ENSG00000204196///OTTHUMG00000020704///OTTHUMG00000032779///OTTHUMG00000154129///OTTHUMG00000155492	neurobeachin-like 1///ribosomal protein L12	Human Genome U133 Plus 2.0 Array	February 2009 (Genome Reference Consortium GRCh37)	GO:0000184|GO:0006412|GO:0006412|GO:0006413|GO:0006414|GO:0006415|GO:0006614|GO:0010467|GO:0016032|GO:0016070|GO:0016071|GO:0019058|GO:0019083|GO:0044267|GO:0005829|GO:0005840|GO:0022625|GO:0030529|GO:0003723|GO:0003735|GO:0005515	IPR020783 // Ribosomal protein L11, C-terminal // 3.1E-16///IPR020783 // Ribosomal protein L11, C-terminal // 1.8E-16///IPR020784 // Ribosomal protein L11, N-terminal // 9.1E-22///IPR020784 // Ribosomal protein L11, N-terminal // 4.1E-8		180475///609816	Ribosomal_Proteins // GenMAPP	NP_000967///NP_001107604	NM_000976///NM_001099273///NM_001114132///NM_198945///NM_205543	AK026491	GenBank
200089_s_at	7098.58	5957.96	6294.03	6955.17	5582.09	6738.6	0.00961685	0	-0.0746198	0.267693	0.0238962	0.0681033	P	P	P	P	P	P	RPL4///SNORD16///SNORD18A///SNORD18B///SNORD18C	6124///595097///595098///595099///595100	0000184 // nuclear-transcribed mRNA catabolic process, nonsense-mediated decay // traceable author statement///0006412 // translation // non-traceable author statement///0006412 // translation // traceable author statement///0006413 // translational initiation // traceable author statement///0006414 // translational elongation // traceable author statement///0006415 // translational termination /…	0005634 // nucleus // inferred from direct assay///0005730 // nucleolus // inferred from direct assay///0005737 // cytoplasm // inferred from direct assay///0005829 // cytosol // traceable author statement///0005840 // ribosome // inferred from electronic annotation///0015934 // large ribosomal subunit // inferred from electronic annotation///0022625 // cytosolic large ribosomal subunit // inferr…	0003723 // RNA binding // traceable author statement///0003735 // structural constituent of ribosome // non-traceable author statement///0005515 // protein binding // inferred from physical interaction	chr15:66791655-66797176 (-) // 90.08 // q22.31	2013-10-23	This probe set was annotated using the Matching Probes based pipeline to a Entrez Gene identifier using 40 transcripts. // true // Matching Probes // A	n333488 // noncode // 8 // Cross Hyb Matching Probes///AK290436 // gb // 4 // Cross Hyb Matching Probes///AK297484 // gb // 8 // Cross Hyb Matching Probes///GENSCAN00000003738 // ensembl // 4 // Cross Hyb Matching Probes///GENSCAN00000004753 // ensembl // 5 // Cross Hyb Matching Probes///GENSCAN00000037662 // ensembl // 2 // Cross Hyb Matching Probes///ENST00000569696 // ensembl // 5 // Cross Hyb…	uc002apv.3(11),uc002apx.3(11),n335619(9),n335684(9),BC001010(11),BC002450(11),BC004532(11),BC007259(11),BC011664(11),AK125772(11),AK291117(11),AK291859(11),AK297490(11),AK298224(11),BC001365(11),BC005817(11),BC007748(11),BC007996(11),BC009888(11),BC010151(11),BC014653(11),BC066925(11),BC095427(11),D23660(11),L20868(11),NM_000968(11),GENSCAN00000007686(10),GENSCAN00000027026(11),GENSCAN00000051509…	Hs.286	chr15q22	66797176	chr15	90.08	66791655	-		ENSG00000174444///ENSG00000229638///ENSG00000230207///ENSG00000263127///OTTHUMG00000019537///OTTHUMG00000133193///OTTHUMG00000156700///OTTHUMG00000175382	ribosomal protein L4///small nucleolar RNA, C/D box 16///small nucleolar RNA, C/D box 18A///small nucleolar RNA, C/D box 18B///small nucleolar RNA, C/D box 18C	Human Genome U133 Plus 2.0 Array	February 2009 (Genome Reference Consortium GRCh37)	GO:0000184|GO:0006412|GO:0006412|GO:0006413|GO:0006414|GO:0006415|GO:0006614|GO:0010467|GO:0016032|GO:0016070|GO:0016071|GO:0019058|GO:0019083|GO:0044267|GO:0005634|GO:0005730|GO:0005737|GO:0005829|GO:0005840|GO:0015934|GO:0022625|GO:0030529|GO:0003723|GO:0003735|GO:0005515	IPR002136 // Ribosomal protein L4/L1e // 2.6E-50///IPR002136 // Ribosomal protein L4/L1e // 1.8E-33		180479	Ribosomal_Proteins // GenMAPP	NP_000959	NM_000968///NR_002440///NR_002441///NR_002442///NR_002443	AI953886	GenBank
200090_at	1659.72	1577.44	1831.96	2153.27	1410.28	1930.41	-0.169741	0	0.0620093	0.493363	-0.0436954	0.181788	P	P	P	P	P	P	FNTA	2339	0006915 // apoptotic process // traceable author statement///0006921 // cellular component disassembly involved in execution phase of apoptosis // traceable author statement///0007179 // transforming growth factor beta receptor signaling pathway // traceable author statement///0007603 // phototransduction, visible light // traceable author statement///0016056 // rhodopsin mediated signaling pathw…	0005737 // cytoplasm // traceable author statement///0005829 // cytosol // traceable author statement///0005875 // microtubule associated complex // inferred from direct assay	0004659 // prenyltransferase activity // inferred from electronic annotation///0004660 // protein farnesyltransferase activity // inferred from direct assay///0004661 // protein geranylgeranyltransferase activity // traceable author statement///0004662 // CAAX-protein geranylgeranyltransferase activity // inferred from electronic annotation///0004663 // Rab geranylgeranyltransferase activity // i…	chr8:42919278-42940931 (+) // 92.37 // p11.21	2013-10-23	This probe set was annotated using the Matching Probes based pipeline to a Entrez Gene identifier using 12 transcripts. // false // Matching Probes // A	ENST00000528400 // ensembl // 6 // Cross Hyb Matching Probes///OTTHUMT00000383250 // vega // 6 // Cross Hyb Matching Probes	AB209689(11),AK123002(11),BC037295(11),BC084566(11),ENST00000302279(11),ENST00000342116(11),ENST00000525099(11),ENST00000526755(11),ENST00000529687(11),L10413(11),NM_002027(11),NR_033698(11)	Hs.138381	chr8p11	42940931	chr8	92.37	42919278	+	EC:2.5.1.58///EC:2.5.1.59	ENSG00000168522///OTTHUMG00000165279	farnesyltransferase, CAAX box, alpha	Human Genome U133 Plus 2.0 Array	February 2009 (Genome Reference Consortium GRCh37)	GO:0006915|GO:0006921|GO:0007179|GO:0007603|GO:0016056|GO:0018342|GO:0018343|GO:0018344|GO:0022400|GO:0045213|GO:0090044|GO:0090045|GO:0005737|GO:0005829|GO:0005875|GO:0004659|GO:0004660|GO:0004661|GO:0004662|GO:0004663|GO:0005515|GO:0008017|GO:0008318|GO:0016740|GO:0030548|GO:0030971|GO:0043014	IPR002088 // Protein prenyltransferase, alpha subunit // 5.1E-13///IPR002088 // Protein prenyltransferase, alpha subunit // 1.6E-15///IPR002088 // Protein prenyltransferase, alpha subunit // 1.8E-15///IPR002088 // Protein prenyltransferase, alpha subunit // 1.4E-12///IPR002088 // Protein prenyltransferase, alpha subunit // 1.5E-11///IPR002088 // Protein prenyltransferase, alpha subunit // 3.0E-14…		134635		NP_002018	NM_001018676///NM_001018677///NM_002027///NR_033698	BG168896	GenBank
200091_s_at	6518.9	4765.1	5982.54	7215.4	4545.68	7051.27	0.0345635	-0.174465	0	0.468534	-0.124567	0.281384	P	P	P	P	P	P	RPS25	6230	0000028 // ribosomal small subunit assembly // inferred from electronic annotation///0000184 // nuclear-transcribed mRNA catabolic process, nonsense-mediated decay // traceable author statement///0006412 // translation // inferred by curator///0006412 // translation // non-traceable author statement///0006412 // translation // traceable author statement///0006413 // translational initiation // tr…	0005730 // nucleolus // inferred from direct assay///0005737 // cytoplasm // inferred from direct assay///0005829 // cytosol // traceable author statement///0005840 // ribosome // inferred from direct assay///0005840 // ribosome // non-traceable author statement///0015935 // small ribosomal subunit // inferred from direct assay///0022627 // cytosolic small ribosomal subunit // inferred from direc…	0003723 // RNA binding // non-traceable author statement///0003735 // structural constituent of ribosome // inferred from electronic annotation	chr11:118886429-118889326 (-) // 80.66 // q23.3	2013-10-23	This probe set was annotated using the Matching Probes based pipeline to a Entrez Gene identifier using 16 transcripts. // false // Matching Probes // A	GENSCAN00000023601 // ensembl // 6 // Cross Hyb Matching Probes///GENSCAN00000028228 // ensembl // 4 // Cross Hyb Matching Probes///ENST00000574076 // ensembl // 4 // Cross Hyb Matching Probes///ENST00000528547 // ensembl // 4 // Cross Hyb Matching Probes///ENST00000392902 // ensembl // 4 // Cross Hyb Matching Probes///ENST00000435591 // ensembl // 4 // Cross Hyb Matching Probes///ENST00000404787…	BC004294(11),BC004986(11),ENST00000524864(11),ENST00000527673(11),ENST00000527791(9),ENST00000527853(11),ENST00000530602(9),ENST00000532567(11),ENST00000570603(11),ENST00000572434(9),ENST00000573025(9),ENST00000573464(11),ENST00000574244(11),ENST00000575083(11),M64716(11),NM_001028(11)	Hs.113029	chr11q23.3	118889326	chr11	80.66	118886429	-		ENSG00000118181///ENSG00000185641///ENSG00000262088///OTTHUMG00000157822///OTTHUMG00000166350///OTTHUMG00000181585	ribosomal protein S25	Human Genome U133 Plus 2.0 Array	February 2009 (Genome Reference Consortium GRCh37)	GO:0000028|GO:0000184|GO:0006412|GO:0006412|GO:0006412|GO:0006413|GO:0006414|GO:0006415|GO:0006614|GO:0010467|GO:0016032|GO:0016070|GO:0016071|GO:0019058|GO:0019083|GO:0044267|GO:0005730|GO:0005737|GO:0005829|GO:0005840|GO:0005840|GO:0015935|GO:0022627|GO:0030529|GO:0003723|GO:0003735	IPR004977 // Ribosomal protein S25 // 9.6E-52		180465	Ribosomal_Proteins // GenMAPP///Ribosomal_Proteins // GenMAPP	NP_001019	NM_001028	AA888388	GenBank
200092_s_at	8570.13	7808.74	8142.21	8852.56	7395.89	8880.27	-0.0154109	0.0934558	0	0.318884	0.132998	0.169439	P	P	P	P	P	P	RPL37	6167	0000184 // nuclear-transcribed mRNA catabolic process, nonsense-mediated decay // traceable author statement///0006412 // translation // non-traceable author statement///0006412 // translation // traceable author statement///0006413 // translational initiation // traceable author statement///0006414 // translational elongation // traceable author statement///0006415 // translational termination /…	0005622 // intracellular // inferred from electronic annotation///0005829 // cytosol // traceable author statement///0005840 // ribosome // inferred from electronic annotation///0022625 // cytosolic large ribosomal subunit // inferred from direct assay///0022625 // cytosolic large ribosomal subunit // traceable author statement///0030529 // ribonucleoprotein complex // inferred from electronic an…	0003723 // RNA binding // traceable author statement///0003735 // structural constituent of ribosome // non-traceable author statement///0003735 // structural constituent of ribosome // traceable author statement///0019843 // rRNA binding // inferred from electronic annotation///0046872 // metal ion binding // inferred from electronic annotation	chr5:40832569-40835312 (-) // 90.1 // p13.1	2013-10-23	This probe set was annotated using the Matching Probes based pipeline to a Entrez Gene identifier using 10 transcripts. // false // Matching Probes // A	n335533 // noncode // 4 // Cross Hyb Matching Probes///GENSCAN00000043943 // ensembl // 2 // Cross Hyb Matching Probes///ENST00000511787 // ensembl // 6 // Cross Hyb Matching Probes///ENST00000509877 // ensembl // 8 // Cross Hyb Matching Probes///ENST00000417156 // ensembl // 2 // Cross Hyb Matching Probes///ENST00000460682 // ensembl // 6 // Cross Hyb Matching Probes///ENST00000464216 // ensembl…	BC079477(11),BX647123(11),CR456890(10),D23661(11),ENST00000274242(11),ENST00000504562(11),ENST00000507642(11),ENST00000508493(9),L11567(11),NM_000997(11)	Hs.179779	chr5p13	40835312	chr5	90.1	40832569	-		ENSG00000145592///OTTHUMG00000094774	ribosomal protein L37	Human Genome U133 Plus 2.0 Array	February 2009 (Genome Reference Consortium GRCh37)	GO:0000184|GO:0006412|GO:0006412|GO:0006413|GO:0006414|GO:0006415|GO:0006614|GO:0010467|GO:0016032|GO:0016070|GO:0016071|GO:0019058|GO:0019083|GO:0044267|GO:0005622|GO:0005829|GO:0005840|GO:0022625|GO:0022625|GO:0030529|GO:0003723|GO:0003735|GO:0003735|GO:0019843|GO:0046872	IPR001569 // Ribosomal protein L37e // 9.0E-29///IPR001569 // Ribosomal protein L37e // 5.6E-29		604181	Ribosomal_Proteins // GenMAPP///Ribosomal_Proteins // GenMAPP	NP_000988	NM_000997	BF216701	GenBank
200093_s_at	3345.72	2891.94	3115.84	3605.15	3342.46	4365.67	0	0.0328169	-0.0133863	0.395261	0.359596	0.517453	P	P	P	P	P	P	HINT1	3094	0006351 // transcription, DNA-dependent // inferred from electronic annotation///0006355 // regulation of transcription, DNA-dependent // inferred from mutant phenotype///0006915 // apoptotic process // inferred from electronic annotation///0007165 // signal transduction // traceable author statement///0008152 // metabolic process // inferred from electronic annotation///0009154 // purine ribonuc…	0000118 // histone deacetylase complex // inferred from direct assay///0005634 // nucleus // inferred from direct assay///0005737 // cytoplasm // inferred from direct assay///0005856 // cytoskeleton // traceable author statement///0005886 // plasma membrane // inferred from direct assay	0000166 // nucleotide binding // inferred from electronic annotation///0003824 // catalytic activity // inferred from electronic annotation///0005080 // protein kinase C binding // traceable author statement///0016787 // hydrolase activity // inferred from direct assay	chr5:130494980-130500993 (-) // 93.63 // q23.3	2013-10-23	This probe set was annotated using the Matching Probes based pipeline to a Entrez Gene identifier using 15 transcripts. // false // Matching Probes // A	ENST00000506207 // ensembl // 8 // Cross Hyb Matching Probes///ENST00000504202 // ensembl // 8 // Cross Hyb Matching Probes///ENST00000508488 // ensembl // 8 // Cross Hyb Matching Probes///ENST00000506908 // ensembl // 8 // Cross Hyb Matching Probes///ENST00000513012 // ensembl // 6 // Cross Hyb Matching Probes///ENST00000520028 // ensembl // 2 // Cross Hyb Matching Probes///OTTHUMT00000371677 //…	AK054976(9),BC001287(11),BC007090(11),BC028300(11),CR457048(10),ENST00000304043(11),ENST00000508495(11),ENST00000511475(11),ENST00000513345(11),NM_005340(11),NR_024610(11),NR_024611(11),NR_073488(11),U27143(11),U51004(11)	Hs.256697	chr5q31.2	130500993	chr5	93.63	130494980	-	EC:3.-.-.-	ENSG00000169567///OTTHUMG00000128995	histidine triad nucleotide binding protein 1	Human Genome U133 Plus 2.0 Array	February 2009 (Genome Reference Consortium GRCh37)	GO:0006351|GO:0006355|GO:0006915|GO:0007165|GO:0008152|GO:0009154|GO:0072332|GO:0000118|GO:0005634|GO:0005737|GO:0005856|GO:0005886|GO:0000166|GO:0003824|GO:0005080|GO:0016787	IPR001310 // Histidine triad (HIT) protein // 3.0E-35///IPR001310 // Histidine triad (HIT) protein // 1.3E-18///IPR001310 // Histidine triad (HIT) protein // 4.4E-19		137200///601314		NP_005331	NM_005340///NR_024610///NR_024611///NR_073488	N32864	GenBank
200094_s_at	5207.18	5076.78	5650.87	5059.75	4200.12	4481.63	-0.206504	0	0.000773907	0.039577	-0.155573	-0.289418	P	P	P	P	P	P	EEF2	1938	0006184 // GTP catabolic process // inferred from electronic annotation///0006412 // translation // traceable author statement///0006414 // translational elongation // traceable author statement///0010467 // gene expression // traceable author statement///0044267 // cellular protein metabolic process // traceable author statement	0005737 // cytoplasm // inferred from electronic annotation///0005829 // cytosol // traceable author statement///0005844 // polysome // inferred from electronic annotation///0030529 // ribonucleoprotein complex // inferred from direct assay	0000166 // nucleotide binding // inferred from electronic annotation///0003746 // translation elongation factor activity // inferred from electronic annotation///0003924 // GTPase activity // inferred from electronic annotation///0005515 // protein binding // inferred from electronic annotation///0005525 // GTP binding // inferred from electronic annotation	chr19:3976054-3976742 (-) // 77.72 // p13.3	2013-10-23	This probe set was annotated using the Matching Probes based pipeline to a Entrez Gene identifier using 5 transcripts. // false // Matching Probes // A	AK298498 // gb // 8 // Cross Hyb Matching Probes///AK299225 // gb // 4 // Cross Hyb Matching Probes///AY942181 // gb // 5 // Cross Hyb Matching Probes///GENSCAN00000002418 // ensembl // 8 // Cross Hyb Matching Probes///OTTHUMT00000457822 // vega // 4 // Cross Hyb Matching Probes///OTTHUMT00000457823 // vega // 8 // Cross Hyb Matching Probes	BC126259(11),BC136313(11),ENST00000309311(11),ENST00000600794(9),NM_001961(11)	Hs.75309	chr19p13.3	3976742	chr19	77.72	3976054	-		ENSG00000167658///OTTHUMG00000181790	eukaryotic translation elongation factor 2	Human Genome U133 Plus 2.0 Array	February 2009 (Genome Reference Consortium GRCh37)	GO:0006184|GO:0006412|GO:0006414|GO:0010467|GO:0044267|GO:0005737|GO:0005829|GO:0005844|GO:0030529|GO:0000166|GO:0003746|GO:0003924|GO:0005515|GO:0005525	IPR000640 // Translation elongation factor EFG, V domain // 1.7E-25///IPR000795 // Elongation factor, GTP-binding domain // 9.0E-64///IPR004161 // Translation elongation factor EFTu/EF1A, domain 2 // 3.6E-15///IPR005517 // Translation elongation factor EFG/EF2, domain IV // 1.3E-41		130610	Translation_Factors // GenMAPP	NP_001952	NM_001961	AI004246	GenBank
200095_x_at	9483.04	8989.56	8997.24	10342.3	9740.95	10176.7	-0.0134406	0.152555	0	0.399211	0.386276	0.22198	P	P	P	P	P	P	RPS10	6204	0000184 // nuclear-transcribed mRNA catabolic process, nonsense-mediated decay // traceable author statement///0006412 // translation // inferred by curator///0006412 // translation // traceable author statement///0006413 // translational initiation // traceable author statement///0006414 // translational elongation // traceable author statement///0006415 // translational termination // traceable…	0005634 // nucleus // inferred from electronic annotation///0005730 // nucleolus // inferred from direct assay///0005737 // cytoplasm // inferred from electronic annotation///0005829 // cytosol // traceable author statement///0005840 // ribosome // non-traceable author statement///0022627 // cytosolic small ribosomal subunit // inferred from direct assay///0030529 // ribonucleoprotein complex // …	0005515 // protein binding // inferred from physical interaction	chr11:46450152-46450478 (-) // 96.13 // p11.2///chr6:34385232-34392545 (-) // 97.02 // p21.31	2013-10-23	This probe set was annotated using the Matching Probes based pipeline to a Entrez Gene identifier using 15 transcripts. // false // Matching Probes // A	uc010ppt.2 // ucsc_genes // 2 // Cross Hyb Matching Probes///n345422 // noncode // 2 // Cross Hyb Matching Probes///n385973 // noncode // 2 // Cross Hyb Matching Probes///n386598 // noncode // 2 // Cross Hyb Matching Probes///AK055590 // gb // 2 // Cross Hyb Matching Probes///NR_026667 // refseq // 2 // Cross Hyb Matching Probes///GENSCAN00000005751 // ensembl // 4 // Cross Hyb Matching Probes///…	BC001032(11),BC001955(11),BC005012(11),BC070235(11),BC071946(11),BC073799(11),ENST00000326199(11),ENST00000344700(11),ENST00000464218(11),ENST00000467531(11),ENST00000494077(11),NM_001014(11),NM_001203245(11),NM_001204091(11),U14972(11)	Hs.76230	chr6p21.31	46450478	chr11	96.13	46450152	-		ENSG00000124614///ENSG00000244313///OTTHUMG00000014546///OTTHUMG00000158376	ribosomal protein S10	Human Genome U133 Plus 2.0 Array	February 2009 (Genome Reference Consortium GRCh37)	GO:0000184|GO:0006412|GO:0006412|GO:0006413|GO:0006414|GO:0006415|GO:0006614|GO:0010467|GO:0016032|GO:0016070|GO:0016071|GO:0019058|GO:0019083|GO:0044267|GO:0005634|GO:0005730|GO:0005737|GO:0005829|GO:0005840|GO:0022627|GO:0030529|GO:0005515	IPR005326 // Plectin/S10, N-terminal // 9.2E-50///IPR005326 // Plectin/S10, N-terminal // 8.2E-50		603632///613308	Ribosomal_Proteins // GenMAPP	NP_001005///NP_001190174///NP_001191020	NM_001014///NM_001203245///NM_001204091	AA320764	GenBank
200096_s_at	4230.33	3691.39	3713.65	2974.26	3131.78	2855.01	0	0.0464888	-0.0986257	-0.22072	-0.0727835	-0.433711	P	P	P	P	P	P	ATP6V0E1	8992	0006810 // transport // inferred from electronic annotation///0006811 // ion transport // inferred from electronic annotation///0006879 // cellular iron ion homeostasis // traceable author statement///0007035 // vacuolar acidification // inferred from sequence or structural similarity///0008286 // insulin receptor signaling pathway // traceable author statement///0015991 // ATP hydrolysis coupled…	0005773 // vacuole // inferred from sequence or structural similarity///0010008 // endosome membrane // traceable author statement///0016020 // membrane // traceable author statement///0016021 // integral to membrane // inferred from electronic annotation///0030670 // phagocytic vesicle membrane // traceable author statement///0033179 // proton-transporting V-type ATPase, V0 domain // inferred fr…	0005215 // transporter activity // non-traceable author statement///0015078 // hydrogen ion transmembrane transporter activity // inferred from electronic annotation///0016787 // hydrolase activity // inferred from electronic annotation///0042625 // ATPase activity, coupled to transmembrane movement of ions // inferred from sequence or structural similarity///0046961 // proton-transporting ATPase…	chr5:172410783-172461897 (+) // 88.08 // q35.1	2013-10-23	This probe set was annotated using the Matching Probes based pipeline to a Entrez Gene identifier using 6 transcripts. // false // Matching Probes // A	CR456856 // gb // 5 // Cross Hyb Matching Probes///CR542131 // gb // 5 // Cross Hyb Matching Probes///ENST00000517669 // ensembl // 5 // Cross Hyb Matching Probes///OTTHUMT00000372564 // vega // 5 // Cross Hyb Matching Probes	BC119714(9),BC119715(9),ENST00000265093(10),ENST00000519374(11),ENST00000519911(11),NM_003945(11)	Hs.24322	chr5q35.1	172461897	chr5	88.08	172410783	+	EC:3.6.3.14	ENSG00000113732///OTTHUMG00000130518	ATPase, H+ transporting, lysosomal 9kDa, V0 subunit e1	Human Genome U133 Plus 2.0 Array	February 2009 (Genome Reference Consortium GRCh37)	GO:0006810|GO:0006811|GO:0006879|GO:0007035|GO:0008286|GO:0015991|GO:0015992|GO:0016049|GO:0033572|GO:0043200|GO:0051701|GO:0055085|GO:0090382|GO:0005773|GO:0010008|GO:0016020|GO:0016021|GO:0030670|GO:0033179|GO:0005215|GO:0015078|GO:0016787|GO:0042625|GO:0046961	IPR008389 // ATPase, V0 complex, subunit e1/e2 // 8.3E-31///IPR008389 // ATPase, V0 complex, subunit e1/e2 // 9.4E-17///IPR008389 // ATPase, V0 complex, subunit e1/e2 // 2.4E-11		603931		NP_003936	NM_003945	AI862255	GenBank
200097_s_at	3339.28	2351.64	2920.27	2808.13	3019.58	3531.79	0.104129	-0.158645	0	0.141722	0.319942	0.318556	P	P	P	P	P	P	HNRNPK///MIR7-1	3190///407043	0000398 // mRNA splicing, via spliceosome // inferred by curator///0000398 // mRNA splicing, via spliceosome // traceable author statement///0006351 // transcription, DNA-dependent // inferred from electronic annotation///0006355 // regulation of transcription, DNA-dependent // inferred from electronic annotation///0006396 // RNA processing // traceable author statement///0006397 // mRNA processi…	0000790 // nuclear chromatin // inferred from direct assay///0002102 // podosome // inferred from electronic annotation///0005634 // nucleus // inferred from direct assay///0005654 // nucleoplasm // traceable author statement///0005681 // spliceosomal complex // inferred from electronic annotation///0005730 // nucleolus // inferred from direct assay///0005737 // cytoplasm // inferred from electro…	0000978 // RNA polymerase II core promoter proximal region sequence-specific DNA binding // inferred from mutant phenotype///0001077 // RNA polymerase II core promoter proximal region sequence-specific DNA binding transcription factor activity involved in positive regulation of transcription // inferred from mutant phenotype///0003676 // nucleic acid binding // inferred from electronic annotation…	chr9:86583208-86595530 (-) // 97.54 // q21.32	2013-10-23	This probe set was annotated using the Matching Probes based pipeline to a Entrez Gene identifier using 11 transcripts. // true // Matching Probes // A		uc011lsw.2(11),uc004and.4(11),uc004anf.4(11),uc004ang.4(11),uc004anh.4(11),uc011lsx.2(11),uc004anl.4(11),uc004anm.4(11),NM_031263(11),NM_031262(11),NM_002140(11),ENST00000376281(11),ENST00000351839(11),ENST00000376264(11),ENST00000376263(11),OTTHUMT00000052855(11),OTTHUMT00000052847(11),OTTHUMT00000052856(11),OTTHUMT00000052845(11)	Hs.129548	chr9q21.32///chr9q21.32-q21.33	86595530	chr9	97.54	86583208	-		ENSG00000165119///OTTHUMG00000020107	heterogeneous nuclear ribonucleoprotein K///microRNA 7-1	Human Genome U133 Plus 2.0 Array	February 2009 (Genome Reference Consortium GRCh37)	GO:0000398|GO:0000398|GO:0006351|GO:0006355|GO:0006396|GO:0006397|GO:0007165|GO:0008380|GO:0010467|GO:0010988|GO:0019048|GO:0042981|GO:0045716|GO:0045944|GO:0048260|GO:0072369|GO:0000790|GO:0002102|GO:0005634|GO:0005654|GO:0005681|GO:0005730|GO:0005737|GO:0019013|GO:0030054|GO:0030529|GO:0042995|GO:0071013|GO:0000978|GO:0001077|GO:0003676|GO:0003677|GO:0003697|GO:0003723|GO:0005515	IPR004088 // K Homology domain, type 1 // 3.6E-14///IPR004088 // K Homology domain, type 1 // 8.3E-14///IPR004088 // K Homology domain, type 1 // 2.7E-22///IPR012987 // ROK, N-terminal // 5.0E-23		600712///615239		NP_002131///NP_112552///NP_112553	NM_002140///NM_031262///NM_031263///NR_029605	AI701949	GenBank
200098_s_at	1331.16	993.22	1079.79	1273.37	1022.02	1245.21	0.179399	0	-0.0332208	0.402886	0.159143	0.21667	P	P	P	P	P	P	ANAPC5	51433	0000075 // cell cycle checkpoint // traceable author statement///0000086 // G2/M transition of mitotic cell cycle // traceable author statement///0000090 // mitotic anaphase // traceable author statement///0000278 // mitotic cell cycle // traceable author statement///0006511 // ubiquitin-dependent protein catabolic process // traceable author statement///0007049 // cell cycle // inferred from ele…	0005634 // nucleus // inferred from direct assay///0005654 // nucleoplasm // traceable author statement///0005680 // anaphase-promoting complex // inferred from direct assay///0005829 // cytosol // traceable author statement	0004842 // ubiquitin-protein ligase activity // traceable author statement///0005515 // protein binding // inferred from electronic annotation///0019903 // protein phosphatase binding // inferred from physical interaction	chr12:121746049-121785686 (-) // 95.39 // q24.31	2013-10-23	This probe set was annotated using the Matching Probes based pipeline to a Entrez Gene identifier using 20 transcripts. // false // Matching Probes // A	AF191339 // gb // 8 // Cross Hyb Matching Probes///GENSCAN00000035658 // ensembl // 8 // Cross Hyb Matching Probes///ENST00000344395 // ensembl // 8 // Cross Hyb Matching Probes///BC020340 // gb // 11 // Negative Strand Matching Probes	AK294139(11),AK301197(11),BC001081(11),BC001950(11),BC003095(11),BC006301(11),BC045686(11),BX537687(11),ENST00000261819(11),ENST00000422342(11),ENST00000441917(11),ENST00000534976(11),ENST00000535482(11),ENST00000535641(11),ENST00000539079(11),ENST00000541887(11),ENST00000543649(11),ENST00000544314(11),NM_001137559(11),NM_016237(11)	Hs.7101	chr12q24.31	121785686	chr12	95.39	121746049	-		ENSG00000089053///OTTHUMG00000169157	anaphase promoting complex subunit 5	Human Genome U133 Plus 2.0 Array	February 2009 (Genome Reference Consortium GRCh37)	GO:0000075|GO:0000086|GO:0000090|GO:0000278|GO:0006511|GO:0007049|GO:0007067|GO:0007094|GO:0016567|GO:0031145|GO:0051301|GO:0051436|GO:0051437|GO:0051439|GO:0070979|GO:0005634|GO:0005654|GO:0005680|GO:0005829|GO:0004842|GO:0005515|GO:0019903			606948		NP_001131031///NP_057321	NM_001137559///NM_016237	T33068	GenBank
200099_s_at	9696.05	9615.37	10492.2	11962.5	9509.32	11097.7	-0.203154	0.027885	0	0.387418	0.129796	0.125199	P	P	P	P	P	P	RPS3A///SNORD73A	6189///8944	0000184 // nuclear-transcribed mRNA catabolic process, nonsense-mediated decay // traceable author statement///0006412 // translation // inferred by curator///0006412 // translation // inferred from mutant phenotype///0006412 // translation // non-traceable author statement///0006412 // translation // traceable author statement///0006413 // translational initiation // traceable author statement//…	0005622 // intracellular // inferred from electronic annotation///0005634 // nucleus // inferred from sequence or structural similarity///0005730 // nucleolus // inferred from direct assay///0005737 // cytoplasm // inferred from direct assay///0005829 // cytosol // inferred from sequence or structural similarity///0005829 // cytosol // traceable author statement///0005840 // ribosome // inferred …	0003723 // RNA binding // non-traceable author statement///0003735 // structural constituent of ribosome // inferred from electronic annotation///0005515 // protein binding // inferred from physical interaction	chr10:86320198-86321019 (+) // 100.0 // q23.1	2013-10-23	This probe set was annotated using the Matching Probes based pipeline to a Entrez Gene identifier using 40 transcripts. // true // Matching Probes // A	n385361 // noncode // 6 // Cross Hyb Matching Probes///BC065737 // gb // 5 // Cross Hyb Matching Probes///NM_001267699 // refseq // 8 // Cross Hyb Matching Probes///GENSCAN00000000974 // ensembl // 4 // Cross Hyb Matching Probes///GENSCAN00000003971 // ensembl // 7 // Cross Hyb Matching Probes///GENSCAN00000004733 // ensembl // 4 // Cross Hyb Matching Probes///GENSCAN00000018960 // ensembl // 2 /…	uc011cie.1(11),uc003ilz.3(11),BC007607(11),BC011660(11),BC021075(11),BC036712(11),BC045105(11),BC094829(11),BC099924(11),AK291075(11),AK296121(11),BC000204(11),BC001708(11),BC004981(11),BC006298(11),BC009219(11),BC009404(11),BC017123(11),BC019072(11),BC030161(11),BC066926(11),BC070211(11),BC071916(11),L13802(11),M77234(11),M84711(11),NM_001006(11),GENSCAN00000000827(11),GENSCAN00000013768(11),GEN…	Hs.307132	chr4q31.2-q31.3///chr4q31.3	86321019	chr10	100	86320198	+		ENSG00000145425///ENSG00000178429///ENSG00000213757///ENSG00000214389///ENSG00000234797///OTTHUMG00000018642///OTTHUMG00000154287///OTTHUMG00000157775///OTTHUMG00000157954///OTTHUMG00000161445	ribosomal protein S3A///small nucleolar RNA, C/D box 73A	Human Genome U133 Plus 2.0 Array	February 2009 (Genome Reference Consortium GRCh37)	GO:0000184|GO:0006412|GO:0006412|GO:0006412|GO:0006412|GO:0006413|GO:0006414|GO:0006415|GO:0006614|GO:0006917|GO:0010467|GO:0016032|GO:0016070|GO:0016071|GO:0019058|GO:0019083|GO:0030154|GO:0044267|GO:0097194|GO:0005622|GO:0005634|GO:0005730|GO:0005737|GO:0005829|GO:0005829|GO:0005840|GO:0022627|GO:0030529|GO:0003723|GO:0003735|GO:0005515	IPR001593 // Ribosomal protein S3Ae // 1.1E-88///IPR001593 // Ribosomal protein S3Ae // 3.0E-44///IPR001593 // Ribosomal protein S3Ae // 2.2E-30///IPR001593 // Ribosomal protein S3Ae // 3.7E-75///IPR001593 // Ribosomal protein S3Ae // 2.8E-72///IPR001593 // Ribosomal protein S3Ae // 3.4E-49///IPR001593 // Ribosomal protein S3Ae // 3.3E-68///IPR001593 // Ribosomal protein S3Ae // 2.1E-75///IPR0015…		180478///603568	Ribosomal_Proteins // GenMAPP	NP_000997///NP_001254628	NM_001006///NM_001267699///NR_000007	AL356115	GenBank
200593_s_at	1016.1	1035.4	1045.8	1009.34	1258.62	1194.16	-0.130869	0.139371	0	0.147016	0.53893	0.235655	P	P	P	P	P	P	HNRNPU	3192	0000398 // mRNA splicing, via spliceosome // inferred by curator///0000398 // mRNA splicing, via spliceosome // traceable author statement///0006396 // RNA processing // traceable author statement///0006397 // mRNA processing // inferred from electronic annotation///0008380 // RNA splicing // traceable author statement///0010467 // gene expression // traceable author statement///0070934 // CRD-me…	0005634 // nucleus // inferred from electronic annotation///0005654 // nucleoplasm // traceable author statement///0005681 // spliceosomal complex // inferred from electronic annotation///0005737 // cytoplasm // inferred from electronic annotation///0009986 // cell surface // inferred from electronic annotation///0019013 // viral nucleocapsid // inferred from electronic annotation///0030529 // ri…	0000166 // nucleotide binding // inferred from electronic annotation///0003676 // nucleic acid binding // inferred from electronic annotation///0003677 // DNA binding // inferred from electronic annotation///0003723 // RNA binding // inferred from electronic annotation///0005515 // protein binding // inferred from physical interaction///0005524 // ATP binding // inferred from electronic annotatio…	chr1:245017707-245027760 (-) // 97.69 // q44	2013-10-23	This probe set was annotated using the Matching Probes based pipeline to a Entrez Gene identifier using 12 transcripts. // false // Matching Probes // A	GENSCAN00000026161 // ensembl // 3 // Cross Hyb Matching Probes///GENSCAN00000026172 // ensembl // 4 // Cross Hyb Matching Probes///GENSCAN00000042344 // ensembl // 2 // Cross Hyb Matching Probes///ENST00000554987 // ensembl // 2 // Cross Hyb Matching Probes///ENST00000475997 // ensembl // 2 // Cross Hyb Matching Probes///ENST00000489705 // ensembl // 2 // Cross Hyb Matching Probes///OTTHUMT00000…	AF068846(11),AF461014(11),AK297119(11),BC003367(11),BC003621(11),BC015782(11),BC024767(11),ENST00000283179(11),ENST00000366525(11),ENST00000444376(11),NM_004501(11),NM_031844(11)	Hs.103804	chr1q44	245027760	chr1	97.69	245017707	-		ENSG00000153187///OTTHUMG00000040396	heterogeneous nuclear ribonucleoprotein U (scaffold attachment factor A)	Human Genome U133 Plus 2.0 Array	February 2009 (Genome Reference Consortium GRCh37)	GO:0000398|GO:0000398|GO:0006396|GO:0006397|GO:0008380|GO:0010467|GO:0070934|GO:0005634|GO:0005654|GO:0005681|GO:0005737|GO:0009986|GO:0019013|GO:0030529|GO:0070937|GO:0071013|GO:0000166|GO:0003676|GO:0003677|GO:0003723|GO:0005515|GO:0005524|GO:0016301	IPR003034 // SAP domain // 5.9E-14///IPR003034 // SAP domain // 6.0E-14///IPR003877 // SPla/RYanodine receptor SPRY // 3.3E-27///IPR003877 // SPla/RYanodine receptor SPRY // 3.4E-27///IPR010488 // Zeta toxin domain // 1.8E-8///IPR010488 // Zeta toxin domain // 1.9E-8		602869	mRNA_processing_Reactome // GenMAPP	NP_004492///NP_114032	NM_004501///NM_031844	BC003621	GenBank
200594_x_at	2561.01	2317.61	2427.23	2274.37	2618.13	2660.49	-0.0119061	0.0871148	0	0.10437	0.38092	0.176641	P	P	P	P	P	P	HNRNPU	3192	0000398 // mRNA splicing, via spliceosome // inferred by curator///0000398 // mRNA splicing, via spliceosome // traceable author statement///0006396 // RNA processing // traceable author statement///0006397 // mRNA processing // inferred from electronic annotation///0008380 // RNA splicing // traceable author statement///0010467 // gene expression // traceable author statement///0070934 // CRD-me…	0005634 // nucleus // inferred from electronic annotation///0005654 // nucleoplasm // traceable author statement///0005681 // spliceosomal complex // inferred from electronic annotation///0005737 // cytoplasm // inferred from electronic annotation///0009986 // cell surface // inferred from electronic annotation///0019013 // viral nucleocapsid // inferred from electronic annotation///0030529 // ri…	0000166 // nucleotide binding // inferred from electronic annotation///0003676 // nucleic acid binding // inferred from electronic annotation///0003677 // DNA binding // inferred from electronic annotation///0003723 // RNA binding // inferred from electronic annotation///0005515 // protein binding // inferred from physical interaction///0005524 // ATP binding // inferred from electronic annotatio…	chr1:245016989-245027651 (-) // 98.91 // q44	2013-10-23	This probe set was annotated using the Matching Probes based pipeline to a Entrez Gene identifier using 7 transcripts. // false // Matching Probes // A	AF461014 // gb // 2 // Cross Hyb Matching Probes///AK297119 // gb // 2 // Cross Hyb Matching Probes///BC024767 // gb // 2 // Cross Hyb Matching Probes///ENST00000366525 // ensembl // 2 // Cross Hyb Matching Probes///OTTHUMT00000097165 // vega // 2 // Cross Hyb Matching Probes	AF068846(11),BC003367(11),BC015782(11),ENST00000283179(11),ENST00000444376(11),NM_004501(11),NM_031844(11)	Hs.103804	chr1q44	245027651	chr1	98.91	245016989	-		ENSG00000153187///OTTHUMG00000040396	heterogeneous nuclear ribonucleoprotein U (scaffold attachment factor A)	Human Genome U133 Plus 2.0 Array	February 2009 (Genome Reference Consortium GRCh37)	GO:0000398|GO:0000398|GO:0006396|GO:0006397|GO:0008380|GO:0010467|GO:0070934|GO:0005634|GO:0005654|GO:0005681|GO:0005737|GO:0009986|GO:0019013|GO:0030529|GO:0070937|GO:0071013|GO:0000166|GO:0003676|GO:0003677|GO:0003723|GO:0005515|GO:0005524|GO:0016301	IPR003034 // SAP domain // 5.9E-14///IPR003034 // SAP domain // 6.0E-14///IPR003877 // SPla/RYanodine receptor SPRY // 3.3E-27///IPR003877 // SPla/RYanodine receptor SPRY // 3.4E-27///IPR010488 // Zeta toxin domain // 1.8E-8///IPR010488 // Zeta toxin domain // 1.9E-8		602869	mRNA_processing_Reactome // GenMAPP	NP_004492///NP_114032	NM_004501///NM_031844	NM_004501	GenBank
200595_s_at	2066.72	1750.18	1832.26	1458.17	1518.95	1515.04	0	0.00325775	-0.0844111	-0.215667	-0.0832605	-0.314422	P	P	P	P	P	P	EIF3A	8661	0001731 // formation of translation preinitiation complex // inferred from electronic annotation///0001732 // formation of translation initiation complex // inferred from direct assay///0006412 // translation // traceable author statement///0006413 // translational initiation // inferred by curator///0006413 // translational initiation // traceable author statement///0006446 // regulation of tran…	0005634 // nucleus // inferred from direct assay///0005730 // nucleolus // inferred from direct assay///0005737 // cytoplasm // inferred from direct assay///0005737 // cytoplasm // non-traceable author statement///0005829 // cytosol // traceable author statement///0005852 // eukaryotic translation initiation factor 3 complex // inferred from direct assay///0016282 // eukaryotic 43S preinitiation …	0003743 // translation initiation factor activity // inferred by curator///0003743 // translation initiation factor activity // inferred from direct assay///0005198 // structural molecule activity // non-traceable author statement///0005515 // protein binding // inferred from physical interaction	chr10:120794556-120840301 (-) // 98.23 // q26.11	2013-10-23	This probe set was annotated using the Matching Probes based pipeline to a Entrez Gene identifier using 4 transcripts. // false // Matching Probes // A	BC114429 // gb // 4 // Cross Hyb Matching Probes///ENST00000478852 // ensembl // 4 // Cross Hyb Matching Probes///OTTHUMT00000050636 // vega // 4 // Cross Hyb Matching Probes///DQ786252 // gb // 11 // Negative Strand Matching Probes	ENST00000369144(11),NM_003750(11),U58046(11),U78311(11)	Hs.198899	chr10q26	120840301	chr10	98.23	120794556	-		ENSG00000107581///OTTHUMG00000019144	eukaryotic translation initiation factor 3, subunit A	Human Genome U133 Plus 2.0 Array	February 2009 (Genome Reference Consortium GRCh37)	GO:0001731|GO:0001732|GO:0006412|GO:0006413|GO:0006413|GO:0006446|GO:0010467|GO:0044267|GO:0005634|GO:0005730|GO:0005737|GO:0005737|GO:0005829|GO:0005852|GO:0016282|GO:0033290|GO:0003743|GO:0003743|GO:0005198|GO:0005515	IPR000717 // Proteasome component (PCI) domain // 7.0E-28		602039	Translation_Factors // GenMAPP	NP_003741	NM_003750	NM_003750	GenBank
200596_s_at	1009.47	733.657	875.741	603.469	645.76	516.817	0.115715	-0.101612	0	-0.339014	-0.167812	-0.716594	P	P	P	P	P	P	EIF3A	8661	0001731 // formation of translation preinitiation complex // inferred from electronic annotation///0001732 // formation of translation initiation complex // inferred from direct assay///0006412 // translation // traceable author statement///0006413 // translational initiation // inferred by curator///0006413 // translational initiation // traceable author statement///0006446 // regulation of tran…	0005634 // nucleus // inferred from direct assay///0005730 // nucleolus // inferred from direct assay///0005737 // cytoplasm // inferred from direct assay///0005737 // cytoplasm // non-traceable author statement///0005829 // cytosol // traceable author statement///0005852 // eukaryotic translation initiation factor 3 complex // inferred from direct assay///0016282 // eukaryotic 43S preinitiation …	0003743 // translation initiation factor activity // inferred by curator///0003743 // translation initiation factor activity // inferred from direct assay///0005198 // structural molecule activity // non-traceable author statement///0005515 // protein binding // inferred from physical interaction	chr10:120793185-120840332 (-) // 97.84 // q26.11	2013-10-23	This probe set was annotated using the Matching Probes based pipeline to a Entrez Gene identifier using 8 transcripts. // false // Matching Probes // A	GENSCAN00000021070 // ensembl // 2 // Cross Hyb Matching Probes	AK302575(10),BC114429(11),ENST00000369144(11),ENST00000541549(11),JX312508(10),NM_003750(11),U58046(11),U78311(11)	Hs.198899	chr10q26	120840332	chr10	97.84	120793185	-		ENSG00000107581///OTTHUMG00000019144	eukaryotic translation initiation factor 3, subunit A	Human Genome U133 Plus 2.0 Array	February 2009 (Genome Reference Consortium GRCh37)	GO:0001731|GO:0001732|GO:0006412|GO:0006413|GO:0006413|GO:0006446|GO:0010467|GO:0044267|GO:0005634|GO:0005730|GO:0005737|GO:0005737|GO:0005829|GO:0005852|GO:0016282|GO:0033290|GO:0003743|GO:0003743|GO:0005198|GO:0005515	IPR000717 // Proteasome component (PCI) domain // 7.0E-28///IPR000717 // Proteasome component (PCI) domain // 6.7E-28		602039	Translation_Factors // GenMAPP	NP_003741	NM_003750	BE614908	GenBank
200597_at	290.729	210.644	227.789	194.498	162.571	184.044	0.221777	0	-0.0408931	-0.0706234	-0.25583	-0.304284	P	P	P	P	P	P	EIF3A	8661	0001731 // formation of translation preinitiation complex // inferred from electronic annotation///0001732 // formation of translation initiation complex // inferred from direct assay///0006412 // translation // traceable author statement///0006413 // translational initiation // inferred by curator///0006413 // translational initiation // traceable author statement///0006446 // regulation of tran…	0005634 // nucleus // inferred from direct assay///0005730 // nucleolus // inferred from direct assay///0005737 // cytoplasm // inferred from direct assay///0005737 // cytoplasm // non-traceable author statement///0005829 // cytosol // traceable author statement///0005852 // eukaryotic translation initiation factor 3 complex // inferred from direct assay///0016282 // eukaryotic 43S preinitiation …	0003743 // translation initiation factor activity // inferred by curator///0003743 // translation initiation factor activity // inferred from direct assay///0005198 // structural molecule activity // non-traceable author statement///0005515 // protein binding // inferred from physical interaction	chr10:120793185-120840332 (-) // 97.84 // q26.11	2013-10-23	This probe set was annotated using the Genome Target Overlap based pipeline to a Entrez Gene identifier using 10 transcripts. // false // Genome Target Overlap // B	uc009xzf.1 // ucsc_genes // 11 // Negative Strand Matching Probes///NM_199461 // refseq // 11 // Negative Strand Matching Probes///ENST00000425699 // ensembl // 11 // Negative Strand Matching Probes	AK302575,AK309542,BC114429,ENST00000369144,ENST00000478852,ENST00000541549,JX312508,NM_003750,U58046,U78311	Hs.198899	chr10q26	120840332	chr10	97.84	120793185	-		ENSG00000107581///OTTHUMG00000019144	eukaryotic translation initiation factor 3, subunit A	Human Genome U133 Plus 2.0 Array	February 2009 (Genome Reference Consortium GRCh37)	GO:0001731|GO:0001732|GO:0006412|GO:0006413|GO:0006413|GO:0006446|GO:0010467|GO:0044267|GO:0005634|GO:0005730|GO:0005737|GO:0005737|GO:0005829|GO:0005852|GO:0016282|GO:0033290|GO:0003743|GO:0003743|GO:0005198|GO:0005515	IPR000717 // Proteasome component (PCI) domain // 7.0E-28///IPR000717 // Proteasome component (PCI) domain // 6.7E-28		602039	Translation_Factors // GenMAPP	NP_003741	NM_003750	AI123320	GenBank
200598_s_at	6019.48	3874.37	4518.28	3713.9	4369.79	3994.75	0.324557	-0.0680261	0	-0.08463	0.223485	-0.133411	P	P	P	P	P	P	HSP90B1///MIR3652	7184///100500842	0001666 // response to hypoxia // inferred from direct assay///0002224 // toll-like receptor signaling pathway // traceable author statement///0006457 // protein folding // inferred from electronic annotation///0006950 // response to stress // inferred from electronic annotation///0006987 // activation of signaling protein activity involved in unfolded protein response // traceable author stateme…	0005576 // extracellular region // traceable author statement///0005783 // endoplasmic reticulum // inferred from direct assay///0005783 // endoplasmic reticulum // traceable author statement///0005788 // endoplasmic reticulum lumen // inferred from direct assay///0005788 // endoplasmic reticulum lumen // traceable author statement///0005789 // endoplasmic reticulum membrane // inferred from dire…	0000166 // nucleotide binding // inferred from electronic annotation///0003723 // RNA binding // inferred from direct assay///0005509 // calcium ion binding // traceable author statement///0005515 // protein binding // inferred from physical interaction///0005524 // ATP binding // inferred from electronic annotation///0019903 // protein phosphatase binding // inferred from direct assay///0046790 …	chr12:104324159-104341704 (+) // 88.64 // q23.3	2013-10-23	This probe set was annotated using the Matching Probes based pipeline to a Entrez Gene identifier using 8 transcripts. // true // Matching Probes // A	NR_073383 // refseq // 2 // Cross Hyb Matching Probes///AK298996 // gb // 1 // Cross Hyb Matching Probes///ENST00000559111 // ensembl // 2 // Cross Hyb Matching Probes///OTTHUMT00000407352 // vega // 1 // Cross Hyb Matching Probes///OTTHUMT00000415747 // vega // 2 // Cross Hyb Matching Probes	uc001tkb.1(11),uc009zui.1(11),AB209534(11),BC009195(11),BC066656(11),NM_003299(11),GENSCAN00000027099(11),ENST00000299767(11),ENST00000548462(11),OTTHUMT00000407349(11),OTTHUMT00000407353(11),OTTHUMT00000407354(11)	Hs.82689	chr12q24.2-q24.3	104341704	chr12	88.64	104324159	+		ENSG00000166598///OTTHUMG00000170118	heat shock protein 90kDa beta (Grp94), member 1///microRNA 3652	Human Genome U133 Plus 2.0 Array	February 2009 (Genome Reference Consortium GRCh37)	GO:0001666|GO:0002224|GO:0006457|GO:0006950|GO:0006987|GO:0015031|GO:0030433|GO:0030968|GO:0031247|GO:0043066|GO:0043066|GO:0043666|GO:0044267|GO:0045087|GO:0051208|GO:0071318|GO:0005576|GO:0005783|GO:0005783|GO:0005788|GO:0005788|GO:0005789|GO:0005829|GO:0005886|GO:0030496|GO:0042470|GO:0044459|GO:0048471|GO:0071682|GO:0000166|GO:0003723|GO:0005509|GO:0005515|GO:0005524|GO:0019903|GO:0046790|GO:…	IPR001404 // Heat shock protein Hsp90 // 3.8E-245///IPR003594 // Histidine kinase-like ATPase, ATP-binding domain // 7.0E-15		191175		NP_003290	NM_003299///NR_037425	AI582238	GenBank
200599_s_at	6030.39	3949.31	4574.27	4305.8	4525.75	4430.32	0.309401	-0.0581565	0	0.110949	0.256309	-0.00187302	P	P	P	P	P	P	HSP90B1///MIR3652	7184///100500842	0001666 // response to hypoxia // inferred from direct assay///0002224 // toll-like receptor signaling pathway // traceable author statement///0006457 // protein folding // inferred from electronic annotation///0006950 // response to stress // inferred from electronic annotation///0006987 // activation of signaling protein activity involved in unfolded protein response // traceable author stateme…	0005576 // extracellular region // traceable author statement///0005783 // endoplasmic reticulum // inferred from direct assay///0005783 // endoplasmic reticulum // traceable author statement///0005788 // endoplasmic reticulum lumen // inferred from direct assay///0005788 // endoplasmic reticulum lumen // traceable author statement///0005789 // endoplasmic reticulum membrane // inferred from dire…	0000166 // nucleotide binding // inferred from electronic annotation///0003723 // RNA binding // inferred from direct assay///0005509 // calcium ion binding // traceable author statement///0005515 // protein binding // inferred from physical interaction///0005524 // ATP binding // inferred from electronic annotation///0019903 // protein phosphatase binding // inferred from direct assay///0046790 …	chr12:104324188-104341703 (+) // 93.24 // q23.3	2013-10-23	This probe set was annotated using the Matching Probes based pipeline to a Entrez Gene identifier using 9 transcripts. // true // Matching Probes // A	uc001fqu.3 // ucsc_genes // 1 // Cross Hyb Matching Probes///uc009zui.1 // ucsc_genes // 4 // Cross Hyb Matching Probes///NR_073383 // refseq // 4 // Cross Hyb Matching Probes///AF369794 // gb // 1 // Cross Hyb Matching Probes///AK090475 // gb // 1 // Cross Hyb Matching Probes///AY956768 // gb // 1 // Cross Hyb Matching Probes///BC009195 // gb // 4 // Cross Hyb Matching Probes///NM_031281 // refs…	uc001tkb.1(11),uc010swg.1(11),AK295262(10),AK300521(11),AB209534(11),BC066656(11),NM_003299(11),ENST00000299767(11),ENST00000548462(11),OTTHUMT00000407349(11),OTTHUMT00000407354(11)	Hs.82689	chr12q24.2-q24.3	104341703	chr12	93.24	104324188	+		ENSG00000166598///OTTHUMG00000170118	heat shock protein 90kDa beta (Grp94), member 1///microRNA 3652	Human Genome U133 Plus 2.0 Array	February 2009 (Genome Reference Consortium GRCh37)	GO:0001666|GO:0002224|GO:0006457|GO:0006950|GO:0006987|GO:0015031|GO:0030433|GO:0030968|GO:0031247|GO:0043066|GO:0043066|GO:0043666|GO:0044267|GO:0045087|GO:0051208|GO:0071318|GO:0005576|GO:0005783|GO:0005783|GO:0005788|GO:0005788|GO:0005789|GO:0005829|GO:0005886|GO:0030496|GO:0042470|GO:0044459|GO:0048471|GO:0071682|GO:0000166|GO:0003723|GO:0005509|GO:0005515|GO:0005524|GO:0019903|GO:0046790|GO:…	IPR001404 // Heat shock protein Hsp90 // 3.8E-245///IPR003594 // Histidine kinase-like ATPase, ATP-binding domain // 7.0E-15		191175		NP_003290	NM_003299///NR_037425	NM_003299	GenBank
200600_at	5620.48	4621.99	4832.14	6389.52	4861.8	5849.26	0.0390844	0	-0.0896401	0.511616	0.190883	0.230212	P	P	P	P	P	P	MSN	4478	0006928 // cellular component movement // traceable author statement///0007159 // leukocyte cell-cell adhesion // inferred from expression pattern///0022614 // membrane to membrane docking // inferred from expression pattern///0050900 // leukocyte migration // inferred from expression pattern///2000401 // regulation of lymphocyte migration // inferred from mutant phenotype	0001931 // uropod // inferred from electronic annotation///0005634 // nucleus // inferred from direct assay///0005730 // nucleolus // inferred from direct assay///0005737 // cytoplasm // inferred from direct assay///0005856 // cytoskeleton // traceable author statement///0005886 // plasma membrane // inferred from direct assay///0005902 // microvillus // inferred from direct assay///0005925 // fo…	0003779 // actin binding // inferred from electronic annotation///0005102 // receptor binding // inferred from physical interaction///0005200 // structural constituent of cytoskeleton // traceable author statement///0005515 // protein binding // inferred from physical interaction///0008092 // cytoskeletal protein binding // inferred from electronic annotation///0019901 // protein kinase binding /…	chrX:64887615-64961792 (+) // 96.42 // q12	2013-10-23	This probe set was annotated using the Matching Probes based pipeline to a Entrez Gene identifier using 4 transcripts. // false // Matching Probes // A	ENST00000486030 // ensembl // 2 // Cross Hyb Matching Probes///OTTHUMT00000056982 // vega // 2 // Cross Hyb Matching Probes	BC017293(11),ENST00000360270(11),M69066(11),NM_002444(11)	Hs.170328	chrXq11.1	64961792	chrX	96.42	64887615	+		ENSG00000147065///OTTHUMG00000021723	moesin	Human Genome U133 Plus 2.0 Array	February 2009 (Genome Reference Consortium GRCh37)	GO:0006928|GO:0007159|GO:0022614|GO:0050900|GO:2000401|GO:0001931|GO:0005634|GO:0005730|GO:0005737|GO:0005856|GO:0005886|GO:0005902|GO:0005925|GO:0009898|GO:0009986|GO:0016020|GO:0016323|GO:0016324|GO:0019898|GO:0030175|GO:0030667|GO:0031527|GO:0031528|GO:0042995|GO:0045177|GO:0070062|GO:0003779|GO:0005102|GO:0005200|GO:0005515|GO:0008092|GO:0019901|GO:0050839	IPR011259 // Ezrin/radixin/moesin, C-terminal // 4.3E-78///IPR018979 // FERM, N-terminal // 7.3E-23///IPR018980 // FERM, C-terminal PH-like domain // 3.9E-36///IPR019748 // FERM central domain // 1.2E-27		309845		NP_002435	NM_002444	NM_002444	GenBank
200601_at	540.955	600.568	615.781	547.014	730.99	417.326	-0.276217	0.117697	0	0.0273733	0.51913	-0.516984	P	P	P	P	P	P	ACTN4	81	0001666 // response to hypoxia // inferred from electronic annotation///0002576 // platelet degranulation // traceable author statement///0006810 // transport // inferred from electronic annotation///0007596 // blood coagulation // traceable author statement///0015031 // protein transport // inferred from electronic annotation///0030168 // platelet activation // traceable author statement///00324…	0001725 // stress fiber // inferred from electronic annotation///0005576 // extracellular region // traceable author statement///0005634 // nucleus // inferred from direct assay///0005737 // cytoplasm // inferred from direct assay///0030018 // Z disc // inferred from electronic annotation///0030529 // ribonucleoprotein complex // inferred from direct assay///0030863 // cortical cytoskeleton // in…	0001882 // nucleoside binding // inferred from direct assay///0003779 // actin binding // traceable author statement///0005178 // integrin binding // traceable author statement///0005509 // calcium ion binding // inferred from electronic annotation///0005515 // protein binding // inferred from physical interaction///0032403 // protein complex binding // inferred from electronic annotation///00428…	chr19:39138080-39220730 (+) // 97.32 // q13.2	2013-10-23	This probe set was annotated using the Matching Probes based pipeline to a Entrez Gene identifier using 6 transcripts. // false // Matching Probes // A	ENST00000589528 // ensembl // 1 // Cross Hyb Matching Probes///ENST00000497637 // ensembl // 6 // Cross Hyb Matching Probes///OTTHUMT00000459236 // vega // 1 // Cross Hyb Matching Probes///OTTHUMT00000268095 // vega // 6 // Cross Hyb Matching Probes	AK304554(10),BC005033(10),ENST00000252699(10),ENST00000440400(10),NM_004924(10),U48734(11)	Hs.182485	chr19q13	39220730	chr19	97.32	39138080	+		ENSG00000130402///OTTHUMG00000137382	actinin, alpha 4	Human Genome U133 Plus 2.0 Array	February 2009 (Genome Reference Consortium GRCh37)	GO:0001666|GO:0002576|GO:0006810|GO:0007596|GO:0015031|GO:0030168|GO:0032417|GO:0042981|GO:0048549|GO:0051017|GO:0051271|GO:0051272|GO:0051272|GO:0051764|GO:0001725|GO:0005576|GO:0005634|GO:0005737|GO:0030018|GO:0030529|GO:0030863|GO:0031093|GO:0031143|GO:0043234|GO:0048471|GO:0070062|GO:0001882|GO:0003779|GO:0005178|GO:0005509|GO:0005515|GO:0032403|GO:0042803|GO:0046872|GO:0047485|GO:0051015	IPR001715 // Calponin homology domain // 3.4E-21///IPR001715 // Calponin homology domain // 2.7E-26///IPR002017 // Spectrin repeat // 4.0E-19///IPR002017 // Spectrin repeat // 1.6E-27///IPR002017 // Spectrin repeat // 2.0E-20///IPR002017 // Spectrin repeat // 7.2E-18///IPR002017 // Spectrin repeat // 3.1E-10///IPR002017 // Spectrin repeat // 8.8E-19///IPR014837 // EF-hand, Ca insensitive // 1.3E-…		603278///604638	Striated_muscle_contraction // GenMAPP	NP_004915	NM_004924	U48734	GenBank
200602_at	4538.36	3332.21	4019.44	2262.65	2547.51	2461.82	0.0858693	-0.116727	0	-0.630768	-0.386212	-0.663014	P	P	P	P	P	P	APP	351	0000085 // G2 phase of mitotic cell cycle // inferred from sequence or structural similarity///0001967 // suckling behavior // inferred from electronic annotation///0002576 // platelet degranulation // traceable author statement///0006378 // mRNA polyadenylation // inferred from sequence or structural similarity///0006417 // regulation of translation // inferred from sequence or structural simila…	0005576 // extracellular region // traceable author statement///0005737 // cytoplasm // inferred from direct assay///0005737 // cytoplasm // inferred from sequence or structural similarity///0005794 // Golgi apparatus // inferred from direct assay///0005794 // Golgi apparatus // inferred from sequence or structural similarity///0005829 // cytosol // traceable author statement///0005886 // plasma …	0003677 // DNA binding // inferred from sequence or structural similarity///0004867 // serine-type endopeptidase inhibitor activity // inferred from direct assay///0005102 // receptor binding // inferred from physical interaction///0005515 // protein binding // inferred from physical interaction///0008201 // heparin binding // inferred from electronic annotation///0008233 // peptidase activity //…	chr21:27252861-27543085 (-) // 95.14 // q21.3	2013-10-23	This probe set was annotated using the Matching Probes based pipeline to a Entrez Gene identifier using 17 transcripts. // false // Matching Probes // A	BC018937 // gb // 6 // Cross Hyb Matching Probes///AF282245 // gb // 6 // Cross Hyb Matching Probes	BC065529(11),ENST00000346798(11),ENST00000348990(11),ENST00000354192(11),ENST00000357903(11),ENST00000358918(11),ENST00000359726(11),NM_000484(11),NM_001136016(11),NM_001136129(11),NM_001136130(11),NM_001136131(11),NM_001204301(11),NM_001204302(11),NM_001204303(11),NM_201413(11),NM_201414(11)	Hs.177486	chr21q21.3	27543085	chr21	95.14	27252861	-		ENSG00000142192///OTTHUMG00000078438	amyloid beta (A4) precursor protein	Human Genome U133 Plus 2.0 Array	February 2009 (Genome Reference Consortium GRCh37)	GO:0000085|GO:0001967|GO:0002576|GO:0006378|GO:0006417|GO:0006468|GO:0006508|GO:0006878|GO:0006897|GO:0006915|GO:0006917|GO:0006979|GO:0007155|GO:0007176|GO:0007219|GO:0007409|GO:0007596|GO:0007617|GO:0007626|GO:0008088|GO:0008203|GO:0008219|GO:0008344|GO:0008542|GO:0010466|GO:0010468|GO:0010952|GO:0010971|GO:0016199|GO:0016322|GO:0016358|GO:0030168|GO:0030198|GO:0030900|GO:0031175|GO:0035235|GO:…	IPR002223 // Proteinase inhibitor I2, Kunitz metazoa // 9.6E-23///IPR002223 // Proteinase inhibitor I2, Kunitz metazoa // 9.3E-23///IPR002223 // Proteinase inhibitor I2, Kunitz metazoa // 9.4E-23///IPR013803 // Amyloidogenic glycoprotein, amyloid-beta peptide // 1.4E-31///IPR013803 // Amyloidogenic glycoprotein, amyloid-beta peptide // 8.4E-32///IPR013803 // Amyloidogenic glycoprotein, amyloid-be…		104300///104760///605714		NP_000475///NP_001129488///NP_001129601///NP_001129602///NP_001129603///NP_001191230///NP_001191231///NP_001191232///NP_958816///NP_958817	NM_000484///NM_001136016///NM_001136129///NM_001136130///NM_001136131///NM_001204301///NM_001204302///NM_001204303///NM_201413///NM_201414	NM_000484	GenBank
200603_at	4090.7	3057.57	4050.22	3234.97	2802.26	3351.79	0	-0.176869	0.0749612	-0.0510764	-0.184753	-0.15385	P	P	P	P	P	P	PRKAR1A	5573	0001707 // mesoderm formation // inferred from electronic annotation///0001932 // regulation of protein phosphorylation // inferred from electronic annotation///0006112 // energy reserve metabolic process // traceable author statement///0006357 // regulation of transcription from RNA polymerase II promoter // traceable author statement///0006469 // negative regulation of protein kinase activity /…	0005737 // cytoplasm // inferred from electronic annotation///0005829 // cytosol // traceable author statement///0005886 // plasma membrane // inferred from electronic annotation///0005952 // cAMP-dependent protein kinase complex // inferred from electronic annotation///0016020 // membrane // inferred from electronic annotation///0031588 // AMP-activated protein kinase complex // inferred from di…	0000166 // nucleotide binding // inferred from electronic annotation///0004862 // cAMP-dependent protein kinase inhibitor activity // inferred from direct assay///0005515 // protein binding // inferred from physical interaction///0008603 // cAMP-dependent protein kinase regulator activity // inferred from electronic annotation///0016301 // kinase activity // inferred from electronic annotation///…	chr17:66508579-66529568 (+) // 97.56 // q24.2	2013-10-23	This probe set was annotated using the Matching Probes based pipeline to a Entrez Gene identifier using 11 transcripts. // false // Matching Probes // A	n334200 // noncode // 4 // Cross Hyb Matching Probes///S54711 // gb // 3 // Cross Hyb Matching Probes	BC036285(11),BC093042(11),ENST00000358598(11),ENST00000392710(11),ENST00000392711(11),ENST00000536854(11),ENST00000589228(11),NM_001276289(11),NM_002734(11),NM_212471(11),NM_212472(11)	Hs.183037	chr17q23-q24	66529568	chr17	97.56	66508579	+	EC:2.7.11.1	ENSG00000108946///OTTHUMG00000180128	protein kinase, cAMP-dependent, regulatory, type I, alpha	Human Genome U133 Plus 2.0 Array	February 2009 (Genome Reference Consortium GRCh37)	GO:0001707|GO:0001932|GO:0006112|GO:0006357|GO:0006469|GO:0006833|GO:0007143|GO:0007165|GO:0007173|GO:0007202|GO:0007507|GO:0007596|GO:0008543|GO:0016310|GO:0034199|GO:0035556|GO:0044281|GO:0045087|GO:0045214|GO:0045835|GO:0045859|GO:0048011|GO:0050796|GO:0055085|GO:0060038|GO:0071377|GO:2000480|GO:0005737|GO:0005829|GO:0005886|GO:0005952|GO:0016020|GO:0031588|GO:0031594|GO:0043234|GO:0000166|GO:…	IPR000595 // Cyclic nucleotide-binding domain // 1.7E-24///IPR000595 // Cyclic nucleotide-binding domain // 3.7E-25///IPR003117 // cAMP-dependent protein kinase, regulatory subunit, type I/II alpha/beta // 2.3E-19///IPR003117 // cAMP-dependent protein kinase, regulatory subunit, type I/II alpha/beta // 1.0E-17		101800///160980///188550///188830///255960///610489	Calcium_regulation_in_cardiac_cells // GenMAPP///G_Protein_Signaling // GenMAPP///Smooth_muscle_contraction // GenMAPP	NP_001263218///NP_001263219///NP_001265362///NP_002725///NP_997636///NP_997637	NM_001276289///NM_001276290///NM_001278433///NM_002734///NM_212471///NM_212472	AL050038	GenBank
200604_s_at	1704.2	1517.35	1474.14	1849.82	1426.67	1797.07	0	0.075552	-0.119913	0.405813	0.104558	0.210123	P	P	P	P	P	P	PRKAR1A	5573	0001707 // mesoderm formation // inferred from electronic annotation///0001932 // regulation of protein phosphorylation // inferred from electronic annotation///0006112 // energy reserve metabolic process // traceable author statement///0006357 // regulation of transcription from RNA polymerase II promoter // traceable author statement///0006469 // negative regulation of protein kinase activity /…	0005737 // cytoplasm // inferred from electronic annotation///0005829 // cytosol // traceable author statement///0005886 // plasma membrane // inferred from electronic annotation///0005952 // cAMP-dependent protein kinase complex // inferred from electronic annotation///0016020 // membrane // inferred from electronic annotation///0031588 // AMP-activated protein kinase complex // inferred from di…	0000166 // nucleotide binding // inferred from electronic annotation///0004862 // cAMP-dependent protein kinase inhibitor activity // inferred from direct assay///0005515 // protein binding // inferred from physical interaction///0008603 // cAMP-dependent protein kinase regulator activity // inferred from electronic annotation///0016301 // kinase activity // inferred from electronic annotation///…	chr17:66508593-66526805 (+) // 99.05 // q24.2	2013-10-23	This probe set was annotated using the Matching Probes based pipeline to a Entrez Gene identifier using 16 transcripts. // false // Matching Probes // A	NM_001276290 // refseq // 4 // Cross Hyb Matching Probes///GENSCAN00000002952 // ensembl // 8 // Cross Hyb Matching Probes///ENST00000585981 // ensembl // 2 // Cross Hyb Matching Probes///ENST00000588188 // ensembl // 4 // Cross Hyb Matching Probes///ENST00000586541 // ensembl // 8 // Cross Hyb Matching Probes///ENST00000585907 // ensembl // 5 // Cross Hyb Matching Probes///OTTHUMT00000449890 // …	AK097580(11),BC036285(11),BC093042(11),ENST00000358598(11),ENST00000392710(11),ENST00000392711(11),ENST00000536854(11),ENST00000586397(11),ENST00000589228(11),ENST00000592800(11),M18468(11),M33336(11),NM_001276289(11),NM_002734(11),NM_212471(11),NM_212472(11)	Hs.183037	chr17q23-q24	66526805	chr17	99.05	66508593	+	EC:2.7.11.1	ENSG00000108946///OTTHUMG00000180128	protein kinase, cAMP-dependent, regulatory, type I, alpha	Human Genome U133 Plus 2.0 Array	February 2009 (Genome Reference Consortium GRCh37)	GO:0001707|GO:0001932|GO:0006112|GO:0006357|GO:0006469|GO:0006833|GO:0007143|GO:0007165|GO:0007173|GO:0007202|GO:0007507|GO:0007596|GO:0008543|GO:0016310|GO:0034199|GO:0035556|GO:0044281|GO:0045087|GO:0045214|GO:0045835|GO:0045859|GO:0048011|GO:0050796|GO:0055085|GO:0060038|GO:0071377|GO:2000480|GO:0005737|GO:0005829|GO:0005886|GO:0005952|GO:0016020|GO:0031588|GO:0031594|GO:0043234|GO:0000166|GO:…	IPR000595 // Cyclic nucleotide-binding domain // 1.7E-24///IPR000595 // Cyclic nucleotide-binding domain // 3.7E-25///IPR000595 // Cyclic nucleotide-binding domain // 6.3E-13///IPR000595 // Cyclic nucleotide-binding domain // 6.4E-15///IPR003117 // cAMP-dependent protein kinase, regulatory subunit, type I/II alpha/beta // 2.3E-19///IPR003117 // cAMP-dependent protein kinase, regulatory subunit, t…		101800///160980///188550///188830///255960///610489	Calcium_regulation_in_cardiac_cells // GenMAPP///G_Protein_Signaling // GenMAPP///Smooth_muscle_contraction // GenMAPP	NP_001263218///NP_001263219///NP_001265362///NP_002725///NP_997636///NP_997637	NM_001276289///NM_001276290///NM_001278433///NM_002734///NM_212471///NM_212472	M18468	GenBank
200605_s_at	3885.89	3150.68	3644.08	3173.02	3068.76	3318.01	0.00338221	-0.0561013	0	-0.00148582	0.0237966	-0.0909777	P	P	P	P	P	P	PRKAR1A	5573	0001707 // mesoderm formation // inferred from electronic annotation///0001932 // regulation of protein phosphorylation // inferred from electronic annotation///0006112 // energy reserve metabolic process // traceable author statement///0006357 // regulation of transcription from RNA polymerase II promoter // traceable author statement///0006469 // negative regulation of protein kinase activity /…	0005737 // cytoplasm // inferred from electronic annotation///0005829 // cytosol // traceable author statement///0005886 // plasma membrane // inferred from electronic annotation///0005952 // cAMP-dependent protein kinase complex // inferred from electronic annotation///0016020 // membrane // inferred from electronic annotation///0031588 // AMP-activated protein kinase complex // inferred from di…	0000166 // nucleotide binding // inferred from electronic annotation///0004862 // cAMP-dependent protein kinase inhibitor activity // inferred from direct assay///0005515 // protein binding // inferred from physical interaction///0008603 // cAMP-dependent protein kinase regulator activity // inferred from electronic annotation///0016301 // kinase activity // inferred from electronic annotation///…	chr17:66508608-66528398 (+) // 97.69 // q24.2	2013-10-23	This probe set was annotated using the Matching Probes based pipeline to a Entrez Gene identifier using 12 transcripts. // false // Matching Probes // A		BC036285(11),BC093042(11),ENST00000358598(11),ENST00000392710(11),ENST00000392711(11),ENST00000536854(11),ENST00000589228(11),M33336(11),NM_001276289(11),NM_002734(11),NM_212471(11),NM_212472(11)	Hs.183037	chr17q23-q24	66528398	chr17	97.69	66508608	+	EC:2.7.11.1	ENSG00000108946///OTTHUMG00000180128	protein kinase, cAMP-dependent, regulatory, type I, alpha	Human Genome U133 Plus 2.0 Array	February 2009 (Genome Reference Consortium GRCh37)	GO:0001707|GO:0001932|GO:0006112|GO:0006357|GO:0006469|GO:0006833|GO:0007143|GO:0007165|GO:0007173|GO:0007202|GO:0007507|GO:0007596|GO:0008543|GO:0016310|GO:0034199|GO:0035556|GO:0044281|GO:0045087|GO:0045214|GO:0045835|GO:0045859|GO:0048011|GO:0050796|GO:0055085|GO:0060038|GO:0071377|GO:2000480|GO:0005737|GO:0005829|GO:0005886|GO:0005952|GO:0016020|GO:0031588|GO:0031594|GO:0043234|GO:0000166|GO:…	IPR000595 // Cyclic nucleotide-binding domain // 1.7E-24///IPR000595 // Cyclic nucleotide-binding domain // 3.7E-25///IPR003117 // cAMP-dependent protein kinase, regulatory subunit, type I/II alpha/beta // 2.3E-19///IPR003117 // cAMP-dependent protein kinase, regulatory subunit, type I/II alpha/beta // 1.0E-17		101800///160980///188550///188830///255960///610489	Calcium_regulation_in_cardiac_cells // GenMAPP///G_Protein_Signaling // GenMAPP///Smooth_muscle_contraction // GenMAPP	NP_001263218///NP_001263219///NP_001265362///NP_002725///NP_997636///NP_997637	NM_001276289///NM_001276290///NM_001278433///NM_002734///NM_212471///NM_212472	NM_002734	GenBank
[truncated: 54,480 more rows]
[truncated: 9 more columns]
